# Supplementary material for: Selective formation of phthalimides from amines, aldehydes and CO by Pd-catalyzed oxidative C–H aminocarbonylation
Source: Royal Society of Chemistry journal article supplement (doi:10.1039/c8qo00282g), 2018-01-01
Supplement: c8qo00282g1.pdf [file c8qo00282g1.pdf]

# Supporting Information

## Selectively Forming Phthalimides from Amines, Aldehydes and CO by Pd-Catalyzed Oxidative C-H Aminocarbonylation

*Renyi Shi, Fan Liao, Huiying Niu and Aiwen Lei*

*College of Chemistry and Molecular Sciences, the Institute for Advanced Studies (IAS), Wuhan*

*University, Wuhan, Hubei 430072, P. R. China*

*National Research Center for Carbohydrate Synthesis, Jiangxi Normal University, Nanchang  
330022, P. R. China*

E-mail: [aiwenlei@whu.edu.cn](mailto:aiwenlei@whu.edu.cn)

### Table of Contents

|                                                        |     |
|--------------------------------------------------------|-----|
| 1. General                                             | S2  |
| 2. Pd-catalyzed aerobic C-H bond aminocarbonylation    | S2  |
| 3. Preparation of <i>d</i> <sup>5</sup> -benzaldehyde  | S2  |
| 4. Preparation of 2-( <i>p</i> -tolyl)isoindolin-1-one | S2  |
| 5. Optimization of reaction conditions                 | S2  |
| 6. Scale-up experiment                                 | S4  |
| 7. Proposed mechanism from <b>V</b> to <b>3a</b>       | S5  |
| 8. Analytical Data of Substrates and Products          | S5  |
| 9. NMR Spectra of Substrates and Products              | S13 |
| 10. References                                         | S47 |

## 1. General

All reactions were carried out in oven-dried Schlenk tube under a mixed oxygen and carbon monoxide atmosphere with a balloon. Toluene and DMA were dried by molecular sieve. Unless otherwise noted, materials were obtained from commercial suppliers and used without further purification. Thin layer chromatography (TLC) employed glass 0.25 mm silica gel plates. GC yields were recorded with a SHIMADZU GC-2014 gas chromatograph instrument with a FID detector and biphenyl was added as an internal standard.  $^1\text{H}$  and  $^{13}\text{C}$  NMR data were recorded with Bruker Advanced II (400 MHz) spectrometers with tetramethylsilane as an internal standard. All chemical shifts ( $\delta$ ) are reported in ppm and coupling constants ( $J$ ) in Hz. All chemical shifts are reported relative to tetramethylsilane or  $d^6$ -DMSO and d-solvent peaks (77.00 ppm, chloroform; 39.60 ppm,  $d^6$ -DMSO), respectively. High resolution massspectra (HRMS) were measured with a Bruker UltiMate3000 & Compact instrument and accurate masses were reported for the molecular ion  $[\text{M}-\text{H}]^-$  or  $[\text{M}+\text{Na}]^+$ .

## 2. Pd-catalyzed aerobic imine-directed C-H bond carbonylation

General Procedure: In an oven-dried Schlenk tube equipped with a stir-bar,  $\text{PdCl}_2$  (3.6 mg, 10 mol%), dppf (5.54 mg, 5 mol%),  $\text{Cu}(\text{OPiv})_2$  (10.6 mg, 20 mol%), amine (0.2 mmol, if it is solid.) were combined. A balloon filled with CO and oxygen (the ratio is 1:7 which beyond the explosion limit) was connected to the Schlenk tube via the side tube, then evacuated and refilled three times. **All these operations involving CO must be in the fumehood with max air draft.** Then DMSO (0.05 mL) and toluene (2.0 mL) were added to the tube via a syringe. At last, aldehyde (6 eq., If the amine is liquid, it will be injected together) was added to the tube. The Schlenk tube was heated at 110 °C for 24 hours and then cooled to room temperature. After the balloon gas was released **carefully in the fumehood**, the reaction was quenched by water and extracted with  $\text{CH}_2\text{Cl}_2$  three times. The combined organic layers were dried over anhydrous  $\text{Na}_2\text{SO}_4$  and evaporated in vacuum. The desired products were obtained in the corresponding yields after purification by flash chromatography on silica gel with hexane and ethyl acetate(10/1).

## 3. Preparation of $d^5$ -benzaldehyde

General Procedure<sup>[11]</sup>: Hexadeuterobenzene (0.84 g, 10 mmol) was added to the mixture of butyllithium (10 mmol) and potassium *tert*-butoxide (10 mmol) in hcxane (4 mL). After 1 h of vigorous stirring, DMF (10 mmol) was added and the products isolated by extraction and fractional distillation.

## 4. Preparation of 2-(*p*-tolyl)isoindolin-1-one

General Procedure<sup>[10]</sup>: *o*-Phthalaldehyde (10 mmol) and *p*-toluidine (10 mmol) were placed in a flame-dried round-bottomed flask, 15 mL of  $\text{CH}_3\text{CN}/\text{DMF}$  ( $\text{CH}_3\text{CN}:\text{DMF} = 2:1$ ) was used as reaction medium, 8 mmol  $\text{TMSCl}$  was added, and the mixture was stirred for 7-9 h at room temperature. The completion of reactions was determined by TLC. The mixture was extracted with (3\*10 mL) acetate ester. The combined organic layer was evaporated in vacuum, and the residue was obtained as analytically pure product. An additional recrystallization with ethanol was carried out when necessary.

## 5. Optimization of reaction conditions

### Optimization of ligands:

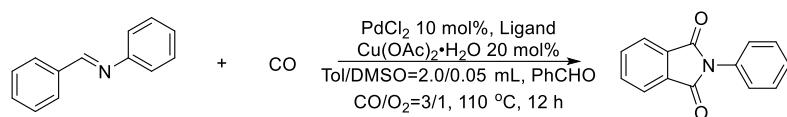

| Entry | Ligand                                        | Yield% | Con. % |
|-------|-----------------------------------------------|--------|--------|
| 1     | none                                          | 43     | 100    |
| 2     | dppm 5 mol%                                   | 43     | 93     |
| 3     | dppe 5 mol%                                   | 23     | 53     |
| 4     | dppp 5 mol%                                   | 29     | 77     |
| 5     | dppb 5 mol%                                   | 34     | 78     |
| 6     | dppf 5 mol%                                   | 50     | 97     |
| 7     | Xantphos 5 mol%                               | 35     | 79     |
| 8     | DPEPhos 5 mol%                                | 41     | 88     |
| 9     | 1,10-phenanthroline 5 mol%                    | 0      | 0      |
| 10    | PPh <sub>3</sub> 10 mol%                      | 32     | 85     |
| 11    | tris(2,4-di-tert-butylphenyl)phosphite 5 mol% | 7      | 27     |
| 12    | di-tert-butylphenylphosphine 5 mol%           | 34     | 80     |
| 13    | PCy <sub>3</sub> 5 mol%                       | 24     | 65     |
| 14    | Ad <sub>2</sub> PBu 5 mol%                    | 24     | 64     |

### Optimization of reaction time:

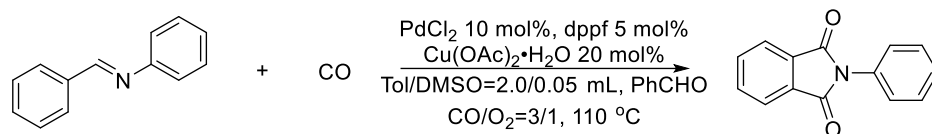

| Entry | Reaction time | Yield% | Con. % |
|-------|---------------|--------|--------|
| 1     | 12 h          | 27     | 82     |
| 2     | 18 h          | 37     | 90     |
| 3     | 24 h          | 48     | 100    |

### Optimization of copper catalysts:

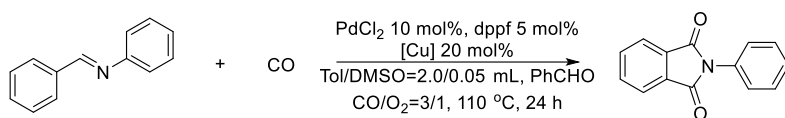

| Entry | [Cu]                                                 | Yield% | Con.% |
|-------|------------------------------------------------------|--------|-------|
| 1     | Cu(OAc) <sub>2</sub> ·H <sub>2</sub> O               | 52     | 100   |
| 2     | Cu( <i>i</i> -PrCOO) <sub>2</sub>                    | 52     | 100   |
| 3     | Cu(EtCOO) <sub>2</sub>                               | 47     | 100   |
| 4     | Cu(C <sub>5</sub> H <sub>11</sub> COO) <sub>2</sub>  | 58     | 100   |
| 5     | Cu(C <sub>11</sub> H <sub>23</sub> COO) <sub>2</sub> | 59     | 100   |
| 6     | Cu(OPiv) <sub>2</sub>                                | 63     | 100   |
| 7     | Cu(PrCOO) <sub>2</sub>                               | 51     | 100   |
| 8     | CuBr <sub>2</sub>                                    | 43     | 100   |
| 9     | CuCl                                                 | 28     | 65    |
| 10    | CuBr                                                 | 40     | 96    |
| 11    | CuI                                                  | 3      | 15    |

After small adjustment of solvent, we get 74% GC yield(84% isolated yield) with the combination of PdCl<sub>2</sub> (10 mol%), dppf (5 mol%) and Cu(OPiv)<sub>2</sub> (20 mol%) in a mixture of toluene and DMSO (2.0/0.05 mL) under the atmosphere of CO/O<sub>2</sub>(the ratio is 1/7 which beyond the explosion limit, this operation must be fumehood) at 110 °C for 24 h.

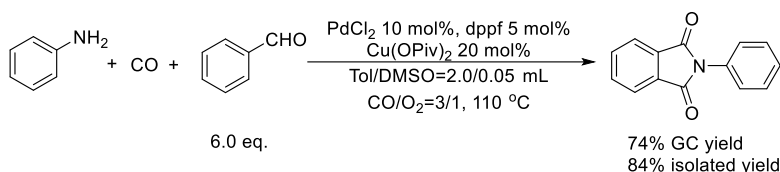

## 6. Scale-up experiment

General Procedure: In an oven-dried Schlenk tube equipped with a stir-bar, PdCl<sub>2</sub> (3.6 mg, 2 mol%), dppf (5.54 mg, 1 mol%), Cu(OPiv)<sub>2</sub> (10.6 mg, 4 mol%), p-toluidine (1 mmol) were combined. A balloon filled with CO and oxygen (the ratio is 1:7 which beyond the explosion limit) was connected to the Schlenk tube via the side tube, then evacuated and refilled three times. **All these operations involving CO must be in the fumehood with max air draft.** Then DMSO (0.05 mL) and toluene (2.0 mL) were added to the tube via a syringe. At last, aldehyde (6 eq.) was added to the tube. The Schlenk tube was heated at 110 °C for 24 hours and then cooled to room temperature. After the balloon gas was released **carefully in the fumehood**, the reaction was quenched by water and extracted with CH<sub>2</sub>Cl<sub>2</sub> three times. The combined organic layers were dried over anhydrous Na<sub>2</sub>SO<sub>4</sub> and evaporated in vacuum. The desired products were obtained in the corresponding yields after purification by flash chromatography on silica gel with hexane and ethyl acetate(10/1).

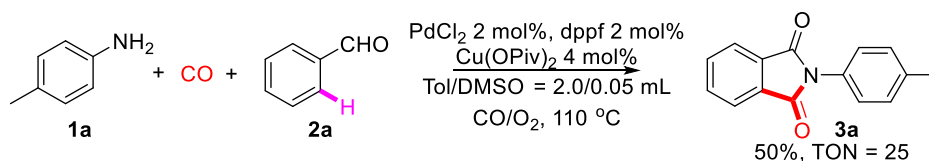

## 7. Proposed mechanism from V to 3a

Cu<sup>I</sup> intermediate reacts with O<sub>2</sub> to generate **A** where Cl<sup>-</sup> plays as a ligand.<sup>[13]</sup> Then **A** reacts with intermediate **V** to give **VI** and Pd<sup>0</sup>. **VI** smoothly runs elimination to give desired product **3a**. On the other hand, Pd<sup>0</sup> would be oxidized by Cu<sup>II</sup>/O<sub>2</sub> to obtain Pd<sup>II</sup>.<sup>[14]</sup>

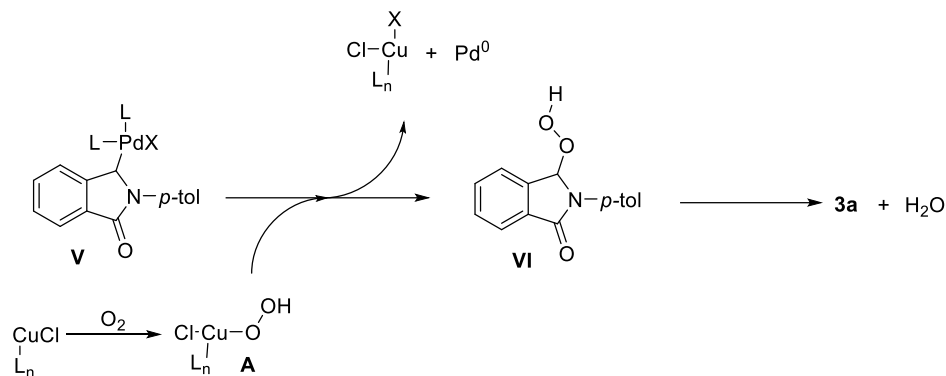

## 8. Analytical Data of Products

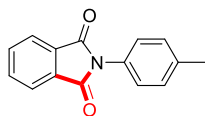

**3a**<sup>[1]</sup> **2-(*p*-tolyl)isoindoline-1, 3-dione**: white solid with 92% isolated yield(hexane/EA = 10/1).

<sup>1</sup>H NMR (400 MHz, *d*<sup>6</sup>-DMSO) δ 7.96-7.93 (m, 2H), 7.91-7.88 (m, 2H), 7.32 (t, *J* = 8.6 Hz, 4H), 2.37 (s, 3H).

<sup>13</sup>C NMR (101 MHz, *d*<sup>6</sup>-DMSO) δ 167.27, 137.77, 134.81, 131.68, 129.48, 129.38, 127.38, 123.51, 20.90.

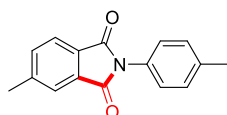

**3b**<sup>[8]</sup> **5-methyl-2-(*p*-tolyl)isoindoline-1,3-dione**: white solid with 70% isolated yield(hexane/EA = 10/1).

<sup>1</sup>H NMR (400 MHz, *d*<sup>6</sup>-DMSO) δ 7.83 (d, *J* = 7.6 Hz, 1H), 7.77 (s, 1H), 7.39 (d, *J* = 7.6 Hz, 1H), 7.33-7.28 (m, 4H), 2.51 (s, 3H), 2.37 (s, 3H).

<sup>13</sup>C NMR (101 MHz, *d*<sup>6</sup>-DMSO) δ 167.26, 167.17, 145.72, 137.61, 135.11, 131.98, 129.40(2C), 129.01, 127.26, 123.87, 123.40, 21.51, 20.85.

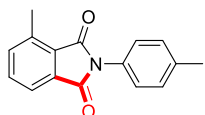

**3c** **4-methyl-2-(*p*-tolyl)isoindoline-1, 3-dione**: white solid with 85% isolated yield(hexane/EA = 10/1).

<sup>1</sup>H NMR (400 MHz, *d*<sup>6</sup>-DMSO) δ 7.76-7.74 (m, 2H), 7.69-7.56 (m, 1H), 7.33-7.28 (m, 4H), 2.65 (s, 3H), 2.37 (s, 3H).

<sup>13</sup>C NMR (101 MHz, *d*<sup>6</sup>-DMSO) δ 167.89, 167.11, 137.67, 137.58, 136.82, 134.27, 132.05, 129.44, 129.37, 128.25, 127.43, 121.13, 20.89, 17.33.

HRMS (ESI) calcd for C<sub>16</sub>H<sub>13</sub>NNaO<sub>2</sub> [M+Na]<sup>+</sup>: 274.0838; Found: 274.0832.

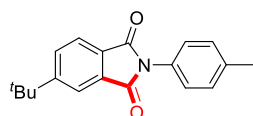

**3e 5-(tert-butyl)-2-(p-tolyl)isoindoline-1, 3-dione:** white solid with 67% isolated yield(hexane/EA = 10/1).

$^1\text{H}$  NMR (400 MHz,  $d^6$ -DMSO)  $\delta$  7.93-7.91 (m, 2H), 7.87 (d,  $J$  = 8.4 Hz, 1H), 7.33-7.28 (m, 4H), 2.37 (s, 3H), 1.37 (s, 9H).

$^{13}\text{C}$  NMR (101 MHz,  $d^6$ -DMSO)  $\delta$  167.36, 167.05, 158.49, 137.64, 131.93, 131.60, 129.45, 129.42, 129.14, 127.32, 123.40, 120.30, 35.63, 30.90, 20.86.

HRMS (ESI) calcd for  $\text{C}_{19}\text{H}_{19}\text{NNaO}_2$   $[\text{M}+\text{Na}]^+$ : 316.1308; Found: 316.1319.

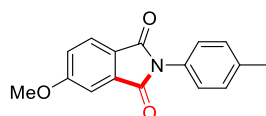

**3f 5-methoxy-2-(p-tolyl)isoindoline-1, 3-dione:** white solid with 58% isolated yield(hexane/EA = 10/1).

$^1\text{H}$  NMR (400 MHz,  $d^6$ -DMSO)  $\delta$  7.86 (dd,  $J$  = 8.2 Hz, 1.0 Hz 1H), 7.45-7.44 (m, 1H), 7.37-7.35 (m, 1H), 7.33-7.28 (m, 4H), 3.94 (s, 3H), 2.36 (s, 3H).

$^{13}\text{C}$  NMR (101 MHz,  $d^6$ -DMSO)  $\delta$  166.83(2C), 164.64, 137.58, 134.27, 129.45, 129.41, 127.22, 125.37, 123.38, 120.25, 108.45, 56.45, 40.23, 40.02, 20.86.

HRMS (ESI) calcd for  $\text{C}_{16}\text{H}_{13}\text{NNaO}_3$   $[\text{M}+\text{Na}]^+$ : 290.0788; Found: 290.0787.

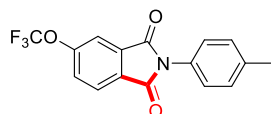

**3h 2-(p-tolyl)-5-(trifluoromethoxy)isoindoline-1, 3-dione:** white solid with 70% isolated yield(hexane/EA = 10/1).

$^1\text{H}$  NMR (400 MHz,  $d^6$ -DMSO)  $\delta$  8.10 (d,  $J$  = 8.0 Hz, 1H), 7.95 (s, 1H), 7.88-7.87 (m, 1H), 7.35-7.30 (m, 4H), 2.37 (s, 3H).

$^{13}\text{C}$  NMR (101 MHz,  $d^6$ -DMSO)  $\delta$  166.12, 165.84, 152.51, 137.98, 134.38, 130.55, 129.51, 129.21, 127.33, 127.09, 125.91, 119.99 (q,  $J$  = 259.27 Hz), 116.33, 20.90.

$^{19}\text{F}$  NMR (377 MHz, DMSO)  $\delta$  -56.89.

HRMS (ESI) calcd for  $\text{C}_{16}\text{H}_9\text{F}_3\text{NO}_3$   $[\text{M}-\text{H}]^-$ : 320.0540; Found: 320.0551.

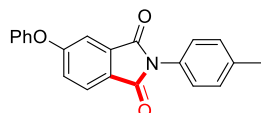

**3i 5-phenoxy-2-(p-tolyl)isoindoline-1, 3-dione:** white solid with 67% isolated yield(hexane/EA = 10/1).

$^1\text{H}$  NMR (400 MHz,  $d^6$ -DMSO)  $\delta$  7.95 (d,  $J$  = 8.0 Hz, 1H), 7.52 (t,  $J$  = 8.0 Hz, 2H), 7.41 (dd,  $J$  = 8.2, 2.2 Hz, 1H), 7.33-7.27 (m, 6H), 7.20 (d,  $J$  = 7.6 Hz, 2H), 2.36 (s, 3H).

$^{13}\text{C}$  NMR (101 MHz,  $d^6$ -DMSO)  $\delta$  166.61, 166.47, 162.89, 154.78, 137.76, 134.37, 130.75, 129.47, 129.34, 127.28, 125.96, 125.54, 125.47, 122.94, 120.41, 111.56, 20.89.

HRMS (ESI) calcd for  $\text{C}_{21}\text{H}_{15}\text{NNaO}_3$   $[\text{M}+\text{Na}]^+$ : 352.0944; Found: 352.0946.

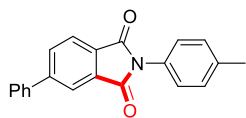

**3j 5-phenyl-2-(p-tolyl)isoindoline-1,3-dione:** white solid with 74% isolated yield(hexane/EA = 10/1).

$^1\text{H}$  NMR (400 MHz,  $\text{CDCl}_3$ )  $\delta$  8.19 (d,  $J$  = 1.2 Hz, 1H), 8.05-8.00 (m, 2H), 7.71-7.69 (m, 2H), 7.57-7.48 (m, 3H), 7.38-7.34 (m, 4H), 2.45 (s, 3H).

$^{13}\text{C}$  NMR (101 MHz,  $\text{CDCl}_3$ )  $\delta$  167.37, 167.28, 147.72, 138.92, 138.15, 132.83, 132.61, 130.14, 129.75, 129.18, 128.94, 128.88, 127.31, 126.41, 124.11, 122.19, 21.20.

HRMS (ESI) calcd for  $\text{C}_{21}\text{H}_{15}\text{NNaO}_2$   $[\text{M}+\text{Na}]^+$ : 336.0995; Found: 336.1000.

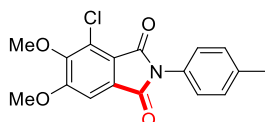

**3k 4-chloro-5,6-dimethoxy-2-(p-tolyl)isoindoline-1,3-dione:** white solid with 48% isolated yield(hexane/EA = 10/1).

$^1\text{H}$  NMR (400 MHz,  $d^6$ -DMSO)  $\delta$  7.60 (s, 1H), 7.33-7.27 (m, 4H), 4.04 (s, 3H), 3.86 (s, 3H), 2.37 (s, 3H).

$^{13}\text{C}$  NMR (101 MHz,  $d^6$ -DMSO)  $\delta$  165.73, 164.78, 158.59, 149.65, 137.81, 129.47, 129.29, 128.80, 127.41, 124.43, 120.19, 106.85, 60.91, 57.42, 20.90.

HRMS (ESI) calcd for  $\text{C}_{17}\text{H}_{14}\text{ClNNaO}_4$   $[\text{M}+\text{Na}]^+$ : 354.0504; Found: 354.0508.

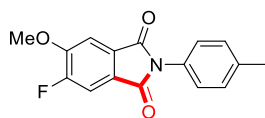

**3l 5-fluoro-6-methoxy-2-(p-tolyl)isoindoline-1,3-dione:** white solid with 50% isolated yield(hexane/EA = 10/1).

$^1\text{H}$  NMR (400 MHz,  $d^6$ -DMSO)  $\delta$  7.88 (d,  $J$  = 9.6 Hz, 1H), 7.74 (d,  $J$  = 7.2 Hz, 1H), 7.33-7.28 (m, 4H), 4.04 (s, 3H), 2.36 (s, 3H).

$^{13}\text{C}$  NMR (101 MHz,  $d^6$ -DMSO)  $\delta$  166.45, 166.19, 155.14 (d,  $J$  = 254.82), 152.83 (d,  $J$  = 11.31 Hz), 137.72, 129.48, 129.37, 129.19 (d,  $J$  = 3.13 Hz), 127.24, 124.20 (d,  $J$  = 8.69 Hz), 111.65 (d,  $J$  = 21.92 Hz), 108.87 (d,  $J$  = 2.83 Hz), 57.32, 20.89.

$^{19}\text{F}$  NMR (377 MHz, DMSO)  $\delta$  -124.82.

HRMS (ESI) calcd for  $\text{C}_{16}\text{H}_{12}\text{FNNaO}_3$   $[\text{M}+\text{Na}]^+$ : 308.0693; Found: 308.0693.

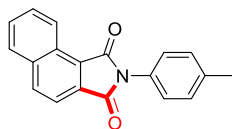

**3m<sup>[12]</sup> 2-(p-tolyl)-1H-benzo[e]isoindole-1,3(2H)-dione:** white solid with 45% isolated yield(hexane/EA = 10/1).

$^1\text{H}$  NMR (400 MHz,  $d^6$ -DMSO)  $\delta$  8.83 (d,  $J$  = 8.4 Hz, 1H), 8.44 (d,  $J$  = 8.0 Hz, 1H), 8.20 (d,  $J$  = 8.4 Hz, 1H), 7.85 (d,  $J$  = 7.6 Hz, 1H), 7.84 (t,  $J$  = 7.4 Hz, 1H), 7.77 (t,  $J$  = 7.6 Hz, 1H), 7.39-7.33 (m, 4H), 2.39 (s, 3H).

$^{13}\text{C}$  NMR (101 MHz,  $d^6$ -DMSO)  $\delta$  168.43, 167.67, 137.64, 136.35, 135.66, 131.13, 130.03, 129.49, 129.36, 129.34, 129.01, 127.44, 127.41, 126.65, 124.11, 118.73, 20.92.

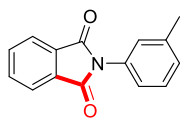

**4a<sup>[2]</sup> 2-(*m*-tolyl)isoindoline-1, 3-dione:** white solid with 91% isolated yield(hexane/EA = 10/1).

<sup>1</sup>H NMR (400 MHz, *d*<sup>6</sup>-DMSO) δ 7.96-7.93 (m, 2H), 7.92-7.89 (m, 2H), 7.41 (t, *J* = 7.8 Hz, 1H), 7.25 (t, *J* = 9.2 Hz, 3H), 2.36 (s, 3H).

<sup>13</sup>C NMR (101 MHz, *d*<sup>6</sup>-DMSO) δ 167.17, 138.46, 134.83, 131.91, 131.63, 128.89, 128.81, 127.96, 124.65, 123.52, 20.99.

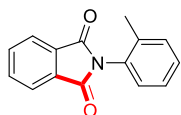

**4b<sup>[1]</sup> 2-(*o*-tolyl)isoindoline-1, 3-dione:** white solid with 92% isolated yield(hexane/EA = 10/1).

<sup>1</sup>H NMR (400 MHz, *d*<sup>6</sup>-DMSO) δ 7.99-7.96 (m, 2H), 7.94-7.91 (m, 2H), 7.41 (dd, *J* = 4.4 Hz, 2.0 Hz, 2H), 7.38-7.33 (m, 2H), 2.12 (s, 3H).

<sup>13</sup>C NMR (101 MHz, *d*<sup>6</sup>-DMSO) δ 167.15, 136.44, 134.90, 131.76, 131.07, 130.80, 129.36, 129.30, 126.79, 123.68, 17.56.

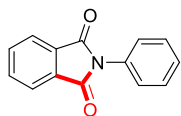

**4c<sup>[1]</sup> 2-phenylisoindoline-1, 3-dione:** white solid with 86% isolated yield(hexane/EA = 10/1).

<sup>1</sup>H NMR (400 MHz, *d*<sup>6</sup>-DMSO) δ 7.98-7.95 (m, 2H), 7.92-7.89 (m, 2H), 7.55-7.51 (m, 2H), 7.46-7.42 (m, 3H).

<sup>13</sup>C NMR (101 MHz, *d*<sup>6</sup>-DMSO) δ 167.15, 134.83, 132.01, 131.65, 128.98, 128.20, 127.53, 123.55.

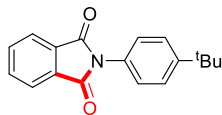

**4d<sup>[1]</sup> 2-(4-(*tert*-butyl)phenyl)isoindoline-1, 3-dione:** white solid with 99% isolated yield(hexane/EA = 10/1).

<sup>1</sup>H NMR (400 MHz, *d*<sup>6</sup>-DMSO) δ 7.97-7.94 (m, 2H), 7.92-7.89 (m, 2H), 7.54 (d, *J* = 8.4 Hz, 2.0 Hz, 2H), 7.36 (d, *J* = 8.8 Hz, 2.0 Hz, 2H), 1.33 (s, 9H).

<sup>13</sup>C NMR (101 MHz, *d*<sup>6</sup>-DMSO) δ 167.20, 150.64, 134.75, 131.62, 129.33, 127.01, 125.74, 123.47, 34.54, 31.17.

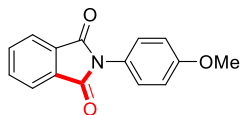

**4e<sup>[2]</sup> 2-(4-methoxyphenyl)isoindoline-1, 3-dione:** white solid with 70% isolated yield(hexane/EA = 10/1).

<sup>1</sup>H NMR (400 MHz, *d*<sup>6</sup>-DMSO) δ 7.96-7.93 (m, 2H), 7.91-7.88 (m, 2H), 7.35 (dt, *J* = 8.8 Hz, 2.6 Hz, 2H), 7.35 (dt, *J* = 12 Hz, 2.8 Hz, 2H), 3.81 (s, 3H).

<sup>13</sup>C NMR (101 MHz, *d*<sup>6</sup>-DMSO) δ 167.39, 158.97, 134.73, 131.69, 128.88, 124.51, 123.44, 114.23, 55.50.

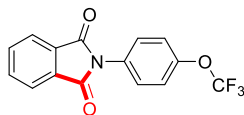



**4f<sup>[4]</sup> 2-(4-(trifluoromethoxy)phenyl)isoindoline-1, 3-dione:** white solid with 82% isolated yield(hexane/EA = 10/1).  
<sup>1</sup>H NMR (400 MHz, *d*<sup>6</sup>-DMSO) δ 8.00-7.97 (m, 2H), 7.94-7.90 (m, 2H), 7.62 (dt, *J* = 8.8 Hz, 2.4 Hz, 2H), 7.55 (d, *J* = 8.8 Hz, 2H).

<sup>13</sup>C NMR (101 MHz, *d*<sup>6</sup>-DMSO) δ 166.89, 147.57, 134.87, 131.62, 131.09, 129.37, 123.60, 121.69, 120.16 (t, *J* = 257.8 Hz).

<sup>19</sup>F NMR (377 MHz, DMSO) δ -56.88.

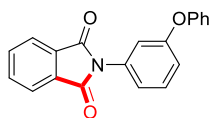

**4g 2-(3-phenoxyphenyl)isoindoline-1,3-dione:** white solid with 77% isolated yield(hexane/EA = 10/1).

<sup>1</sup>H NMR (400 MHz, *d*<sup>6</sup>-DMSO) δ 7.95-7.92 (m, 2H), 7.90-7.87 (m, 2H), 7.52 (t, *J* = 8.2 Hz, 1H), 7.42 (t, *J* = 8.0 Hz, 2H), 7.23 (dq, *J* = 8.0 Hz, 0.8 Hz, 1H), 7.19-7.14 (m, 2H), 7.10-7.05(m, 3H).

<sup>13</sup>C NMR (101 MHz, *d*<sup>6</sup>-DMSO) δ 166.93, 157.04, 156.10, 134.83, 133.41, 131.63, 130.31, 130.24, 124.08, 123.55, 122.26, 119.16, 117.86, 117.38.

HRMS (ESI) calcd for C<sub>20</sub>H<sub>13</sub>NNaO<sub>3</sub> [M+Na]<sup>+</sup>: 338.0788; Found: 338.0788.

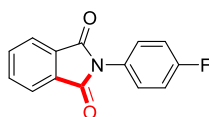

**4h<sup>[2]</sup> 2-(4-fluorophenyl)isoindoline-1, 3-dione:** white solid with 91% isolated yield(hexane/EA = 10/1).

<sup>1</sup>H NMR (400 MHz, *d*<sup>6</sup>-DMSO) δ 7.98-7.95 (m, 2H), 7.92-7.89 (m, 2H), 7.53-7.48 (m, 2H), 7.41-7.35 (m, 2H).

<sup>13</sup>C NMR (101 MHz, *d*<sup>6</sup>-DMSO) δ 167.14, 161.50 (d, *J* = 245.94 Hz), 134.85, 131.68, 129.78 (d, *J* = 8.89 Hz), 128.27 (d, *J* = 2.93 Hz), 123.57, 115.92 (d, *J* = 22.93 Hz).

<sup>19</sup>F NMR (377 MHz, DMSO) δ -113.51.

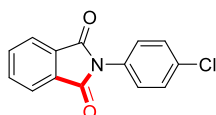

**4i<sup>[2]</sup> 2-(4-chlorophenyl)isoindoline-1, 3-dione:** white solid with 77% isolated yield(hexane/EA = 10/1).

<sup>1</sup>H NMR (400 MHz, *d*<sup>6</sup>-DMSO) δ 7.99-7.96 (m, 2H), 7.93-7.90 (m, 2H), 7.61 (dt, *J* = 8.8 Hz, 2.4 Hz, 2H), 7.50 (dt, *J* = 8.4 Hz, 2.4 Hz, 2H).

<sup>13</sup>C NMR (101 MHz, *d*<sup>6</sup>-DMSO) δ 166.93, 134.90, 132.66, 131.66, 130.93, 129.24, 129.04, 123.62.

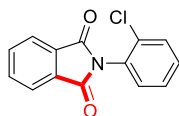

**4j<sup>[3]</sup> 2-(2-chlorophenyl)isoindoline-1, 3-dione:** white solid with 79% isolated yield(hexane/EA = 10/1).

<sup>1</sup>H NMR (400 MHz, *d*<sup>6</sup>-DMSO) δ 8.04-7.99 (m, 2H), 7.97-7.93 (m, 2H), 7.72-7.70 (m, 1H), 7.65-7.63 (m, 1H), 7.59-7.51 (m, 2H).

<sup>13</sup>C NMR (101 MHz, *d*<sup>6</sup>-DMSO) δ 166.43, 135.17, 132.32, 131.57, 131.47, 131.25, 129.96, 129.70, 128.27, 123.87.

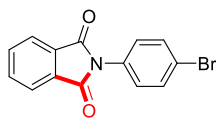

**4k<sup>[2]</sup> 2-(4-bromophenyl)isoindoline-1, 3-dione:** white solid with 75% isolated yield(hexane/EA = 10/1).

<sup>1</sup>H NMR (400 MHz, *d*<sup>6</sup>-DMSO)  $\delta$  7.98-7.95 (m, 2H), 7.93-7.89 (m, 2H), 7.74 (dt, *J* = 8.8 Hz, 2.4 Hz, 2H), 7.43 (dt, *J* = 8.4 Hz, 2.2 Hz, 2H).

<sup>13</sup>C NMR (101 MHz, *d*<sup>6</sup>-DMSO)  $\delta$  166.86, 134.89, 131.98, 131.63, 131.36, 129.51, 123.61, 121.13.

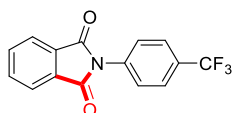

**4l<sup>[2]</sup> 2-(4-(trifluoromethyl)phenyl)isoindoline-1, 3-dione:** white solid with 57% isolated yield(hexane/EA = 10/1).

<sup>1</sup>H NMR (400 MHz, CDCl<sub>3</sub>)  $\delta$  8.00-7.97 (m, 2H), 7.84-7.82 (m, 2H), 7.78 (d, *J* = 8.4 Hz, 2H), 7.64 (d, *J* = 8.4 Hz, 2H).

<sup>13</sup>C NMR (101 MHz, CDCl<sub>3</sub>)  $\delta$  166.79, 134.78, 130.17 (q, *J* = 266.54 Hz), 130.95, 129.66, 128.85, 126.46, 126.25 (q, *J* = 3.8 Hz), 124.04.

<sup>19</sup>F NMR (377 MHz, CDCl<sub>3</sub>)  $\delta$  -62.60.

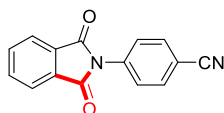

**4m<sup>[5]</sup> 4-(1, 3-dioxisoindolin-2-yl)benzonitrile:** white solid with 69% isolated yield(hexane/EA = 5/1).

<sup>1</sup>H NMR (400 MHz, *d*<sup>6</sup>-DMSO)  $\delta$  8.04-8.01 (m, 2H), 8.00-7.98 (m, 2H), 7.95-7.92 (m, 2H), 7.71 (d, *J* = 8.8 Hz, 2H).

<sup>13</sup>C NMR (101 MHz, *d*<sup>6</sup>-DMSO)  $\delta$  166.58, 136.32, 135.07, 133.11, 131.61, 127.92, 123.79, 118.63, 110.43.

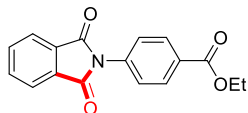

**4n<sup>[6]</sup> ethyl 4-(1, 3-dioxisoindolin-2-yl)benzoate:** white solid with 87% isolated yield(hexane/EA = 5/1).

<sup>1</sup>H NMR (400 MHz, *d*<sup>6</sup>-DMSO)  $\delta$  8.10 (d, *J* = 8.4 Hz, 2H), 8.00-7.96 (m, 2H), 7.93-7.90 (m, 2H), 7.64 (d, *J* = 8.4 Hz, 2H), 4.35 (q, *J* = 7.1 Hz, 2H), 1.34 (t, *J* = 7.2 Hz, 3H).

<sup>13</sup>C NMR (101 MHz, *d*<sup>6</sup>-DMSO)  $\delta$  166.77, 165.32, 136.27, 135.02, 131.61, 129.81, 129.12, 127.26, 123.71, 61.12, 14.31.

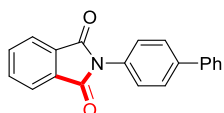

**4o<sup>[5]</sup> 2-([1, 1'-biphenyl]-4-yl)isoindoline-1,3-dione:** white solid with 60% isolated yield(hexane/EA = 10/1).

<sup>1</sup>H NMR (400 MHz, CDCl<sub>3</sub>)  $\delta$  8.00-7.96 (m, 2H), 7.83-7.80 (m, 2H), 7.73 (d, *J* = 8.4 Hz, 2H), 7.62 (d, *J* = 7.6 Hz, 2H), 7.53 (d, *J* = 8.4 Hz, 2H), 7.47 (t, *J* = 7.4 Hz, 2H), 7.38 (t, *J* = 7.6 Hz, 1H).

<sup>13</sup>C NMR (101 MHz, CDCl<sub>3</sub>)  $\delta$  167.32, 141.09, 134.45, 133.54, 131.76, 130.74, 128.84, 127.88, 127.61, 127.22, 126.76, 123.80.

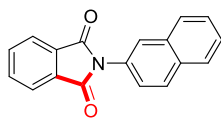

**4p<sup>[7]</sup> 2-(naphthalen-2-yl)isoindoline-1,3-dione:** white solid with 70% isolated yield(hexane/EA = 10/1).

<sup>1</sup>H NMR (400 MHz, *d*<sup>6</sup>-DMSO)  $\delta$  8.08 (d, *J* = 8.4 Hz, 1H), 8.04-7.97 (m, 5H), 7.96-7.94 (m, 2H), 7.64-7.60 (m, 3H).

<sup>13</sup>C NMR (101 MHz, *d*<sup>6</sup>-DMSO)  $\delta$  167.29, 134.91, 132.78, 132.23, 131.71, 129.55, 128.60, 128.05, 127.82, 126.92, 126.83, 126.18, 125.44, 123.61.

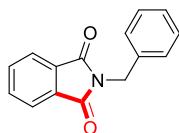

**4q<sup>[1]</sup> 2-benzylisoindoline-1,3-dione:** white solid with 51% isolated yield(hexane/EA = 10/1).

<sup>1</sup>H NMR (400 MHz, CDCl<sub>3</sub>)  $\delta$  7.84 (dd, *J* = 5.2 Hz, 3.2 Hz, 2H), 7.69 (dd, *J* = 5.2 Hz, 3.2 Hz, 2H), 7.46 (d, *J* = 7.2 Hz, 2H), 7.36-7.26 (m, 3H), 4.87 (s, 2H).

<sup>13</sup>C NMR (101 MHz, CDCl<sub>3</sub>)  $\delta$  167.84, 136.23, 133.81, 131.93, 128.51, 128.44, 127.66, 123.15, 41.44.

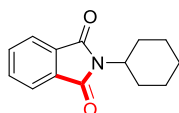

**4r<sup>[2]</sup> 2-cyclohexylisoindoline-1,3-dione:** white solid with 38% isolated yield(hexane/EA = 10/1).

<sup>1</sup>H NMR (400 MHz, CDCl<sub>3</sub>)  $\delta$  7.81-7.78 (m, 2H), 7.71-7.68 (m, 2H), 4.10 (tt, *J* = 5.2 Hz, 4 Hz, 1H), 2.20 (dq, *J* = 12.4 Hz, 3.0 Hz, 2H), 1.88-1.84 (m, 2H), 1.74-1.67 (m, 3H), 1.42-1.24 (m, 3H).

<sup>13</sup>C NMR (101 MHz, CDCl<sub>3</sub>)  $\delta$  168.34, 133.64, 131.92, 122.88, 50.73, 29.74, 25.90, 25.00.

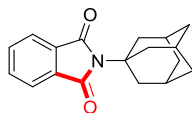

**4s<sup>[1]</sup> 2-((1S,3S)-adamantan-1-yl)isoindoline-1,3-dione:** white solid with 59% isolated yield(hexane/EA = 10/1).

<sup>1</sup>H NMR (400 MHz, CDCl<sub>3</sub>)  $\delta$  7.78-7.75 (m, 2H), 7.70-7.67 (m, 2H), 2.53 (d, *J* = 2.4 Hz, 6H), 2.18-2.07 (m, 3H), 1.83-1.71 (m, 6H).

<sup>13</sup>C NMR (101 MHz, CDCl<sub>3</sub>)  $\delta$  169.79, 133.58, 131.91, 122.46, 60.34, 40.15, 36.14, 29.74.

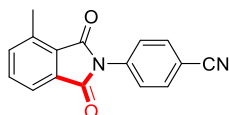

**4t<sup>[9]</sup> 4-(4-methyl-1,3-dioxoisindolin-2-yl)benzonitrile:** white solid with 80% isolated yield(hexane/EA = 10/1).

<sup>1</sup>H NMR (400 MHz, *d*<sup>6</sup>-DMSO)  $\delta$  8.02 (d, *J* = 8.4 Hz, 2H), 7.81-7.76 (m, 2H), 7.71-7.68 (m, 3H), 2.66 (s, 3H).

<sup>13</sup>C NMR (101 MHz, *d*<sup>6</sup>-DMSO)  $\delta$  167.16, 166.43, 137.89, 137.08, 136.31, 134.56, 133.05, 131.96, 128.20, 127.96, 121.44, 118.61, 110.38, 17.36.

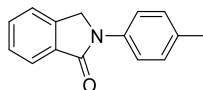

**7<sup>[10]</sup> 2-(*p*-tolyl)isoindolin-1-one**

<sup>1</sup>H NMR (400 MHz, CDCl<sub>3</sub>) δ 7.95 (d, *J* = 7.2 Hz, 1H), 7.77 (d, *J* = 8.4 Hz, 2H), 7.62 (d, *J* = 7.0 Hz, 1H), 7.53 (d, *J* = 7.2 Hz, 2H), 7.27 (d, *J* = 8.0 Hz, 1H), 4.86 (s, 2H), 2.39 (s, 3H).

<sup>13</sup>C NMR (101 MHz, CDCl<sub>3</sub>) δ 167.36, 140.10, 136.91, 134.18, 133.29, 131.88, 129.65, 128.30, 124.05, 122.55, 119.59, 50.85, 20.85.

## 9. NMR Spectra of Substrates and Products

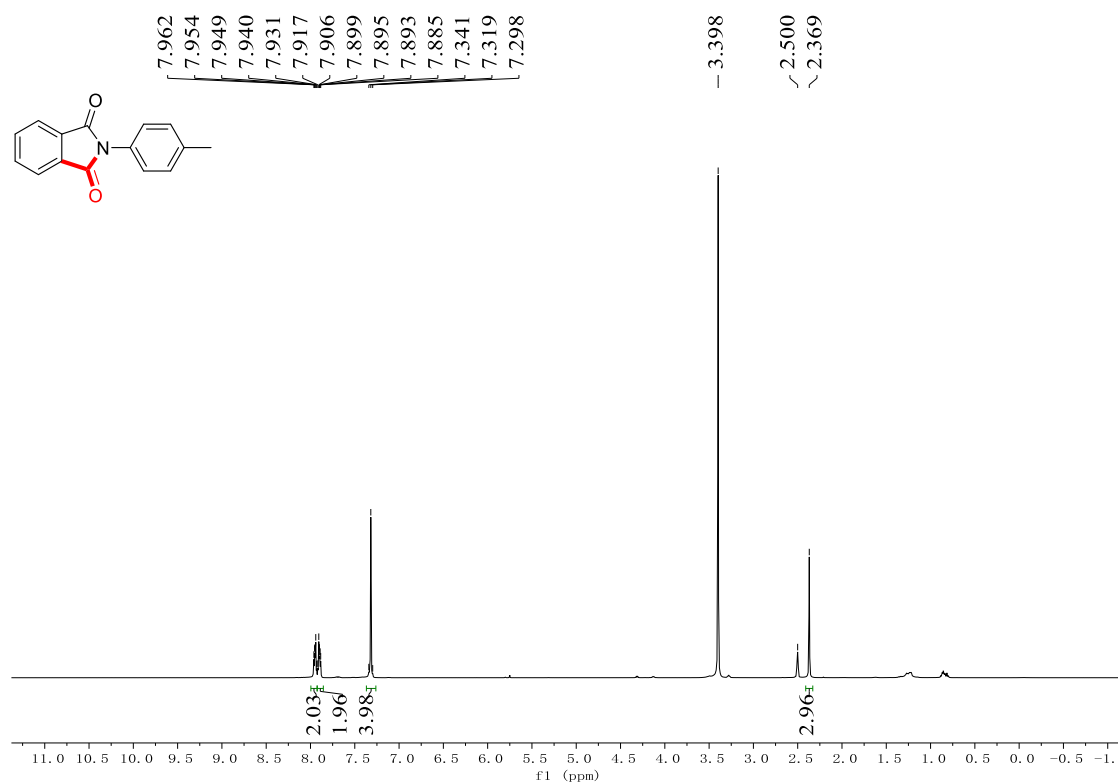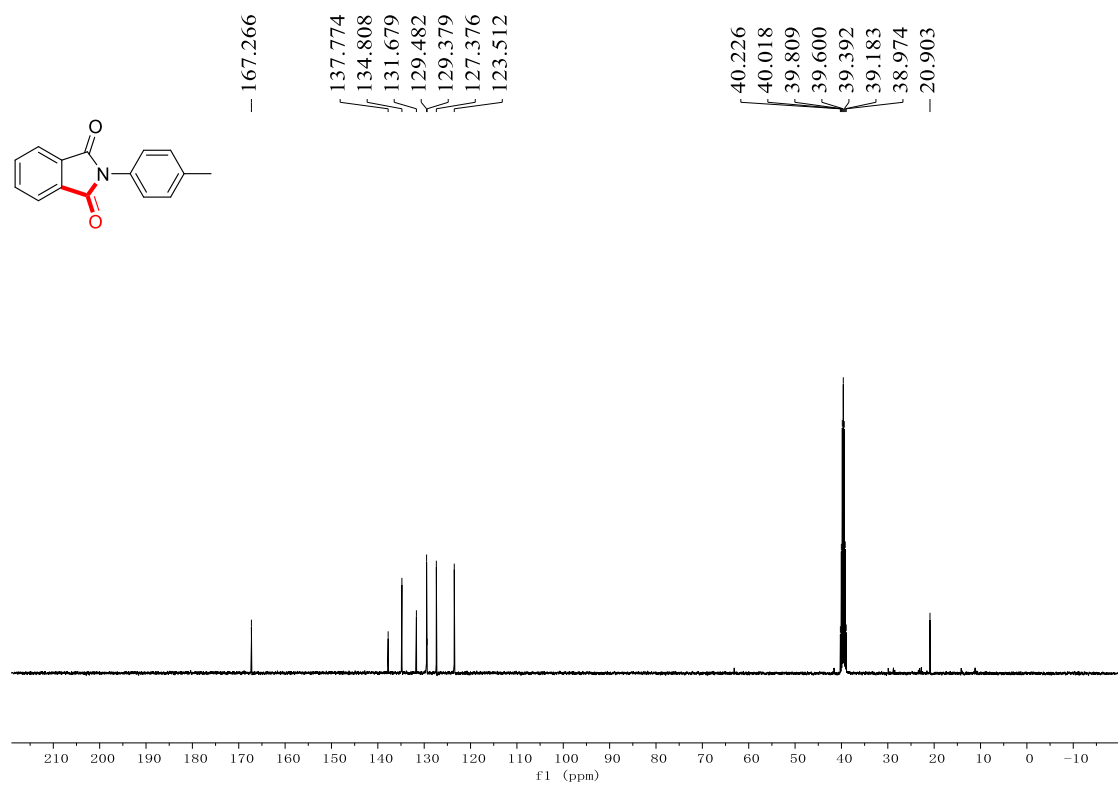

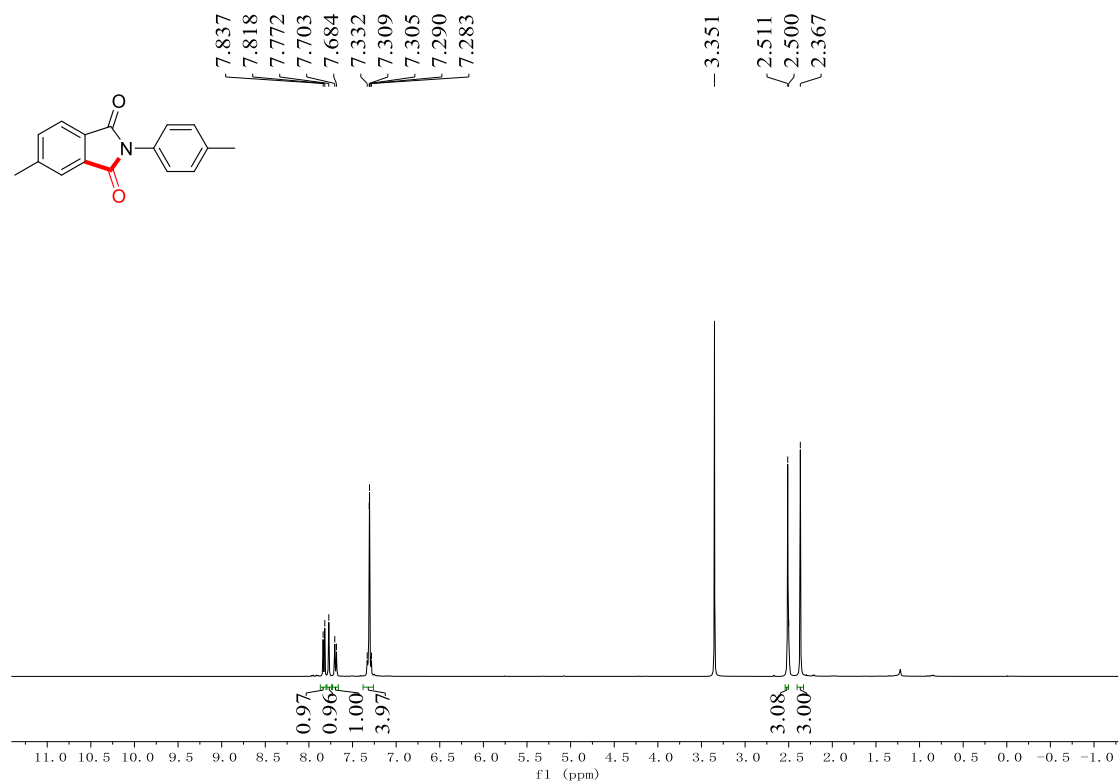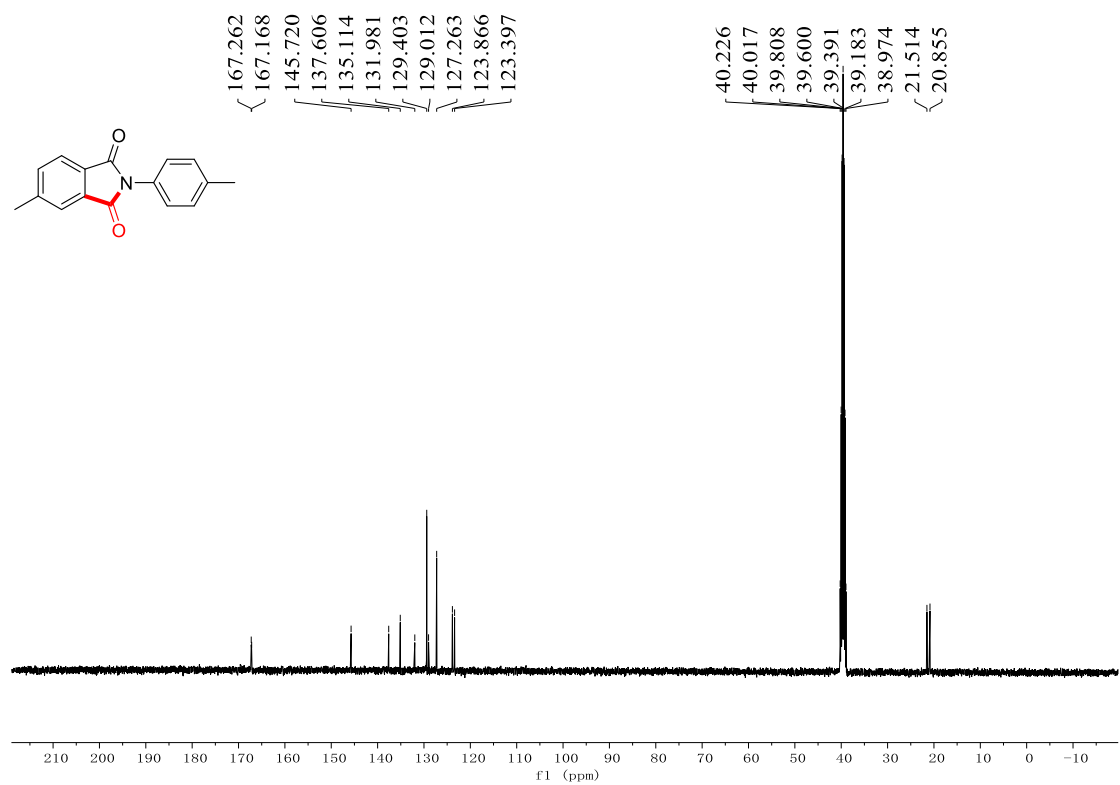

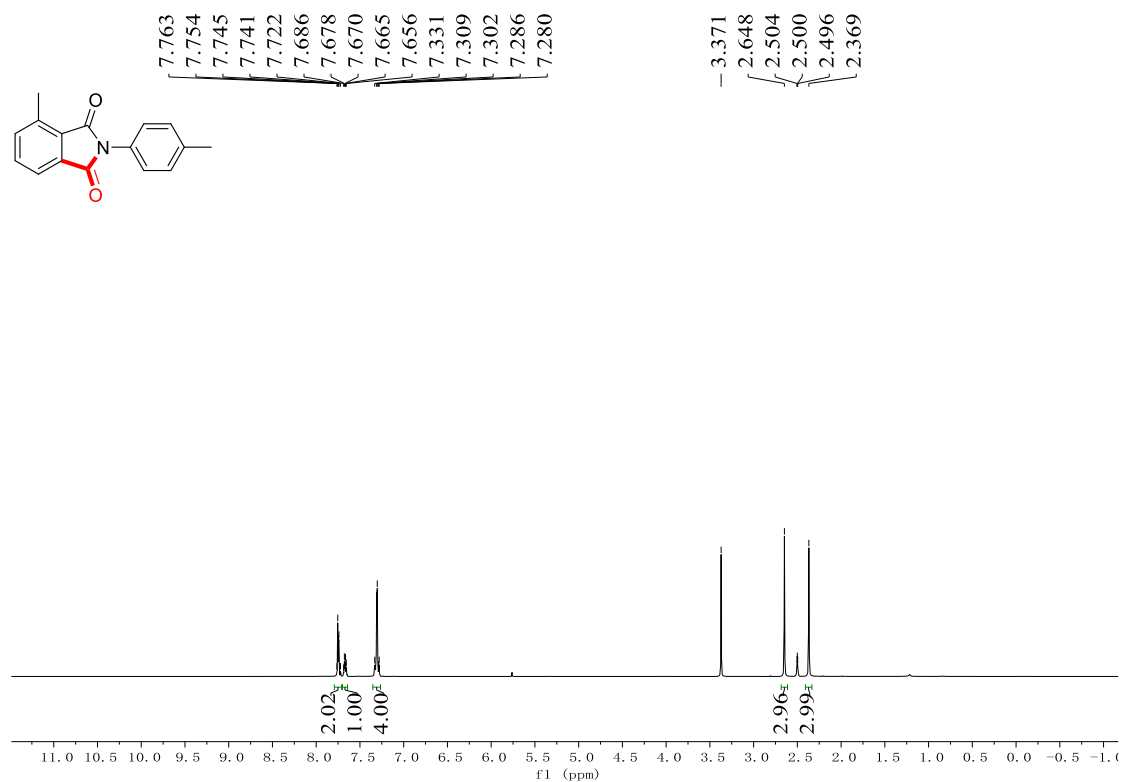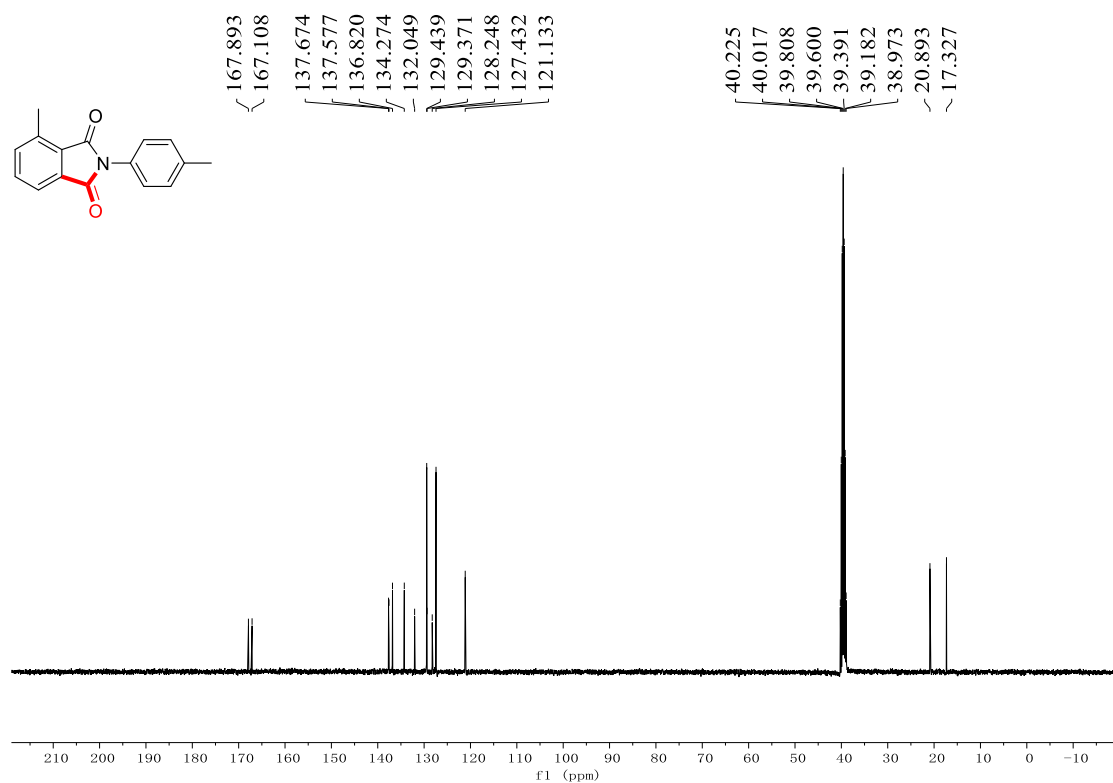

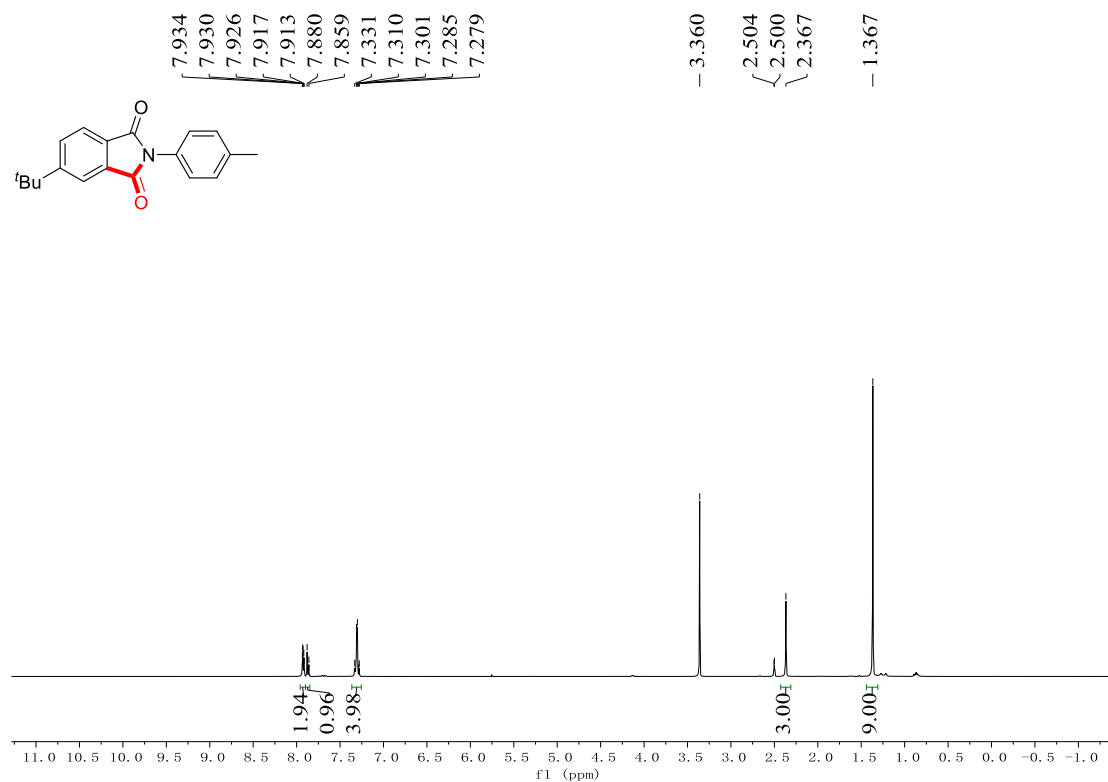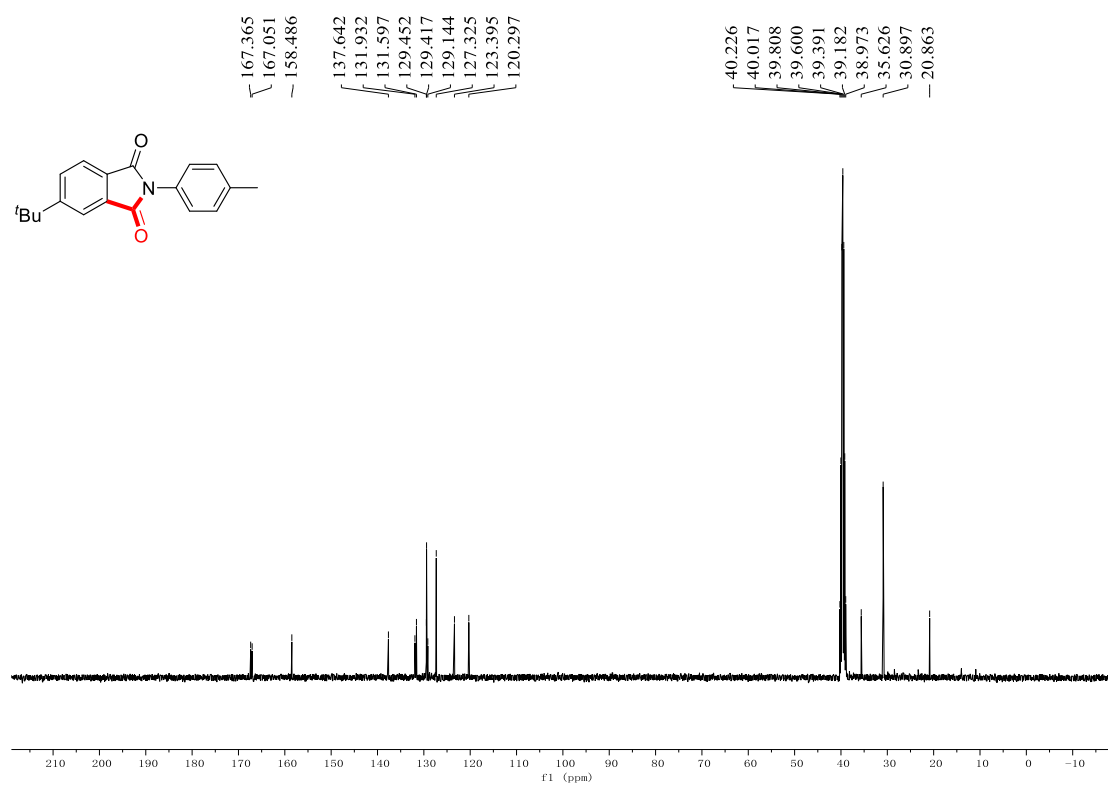



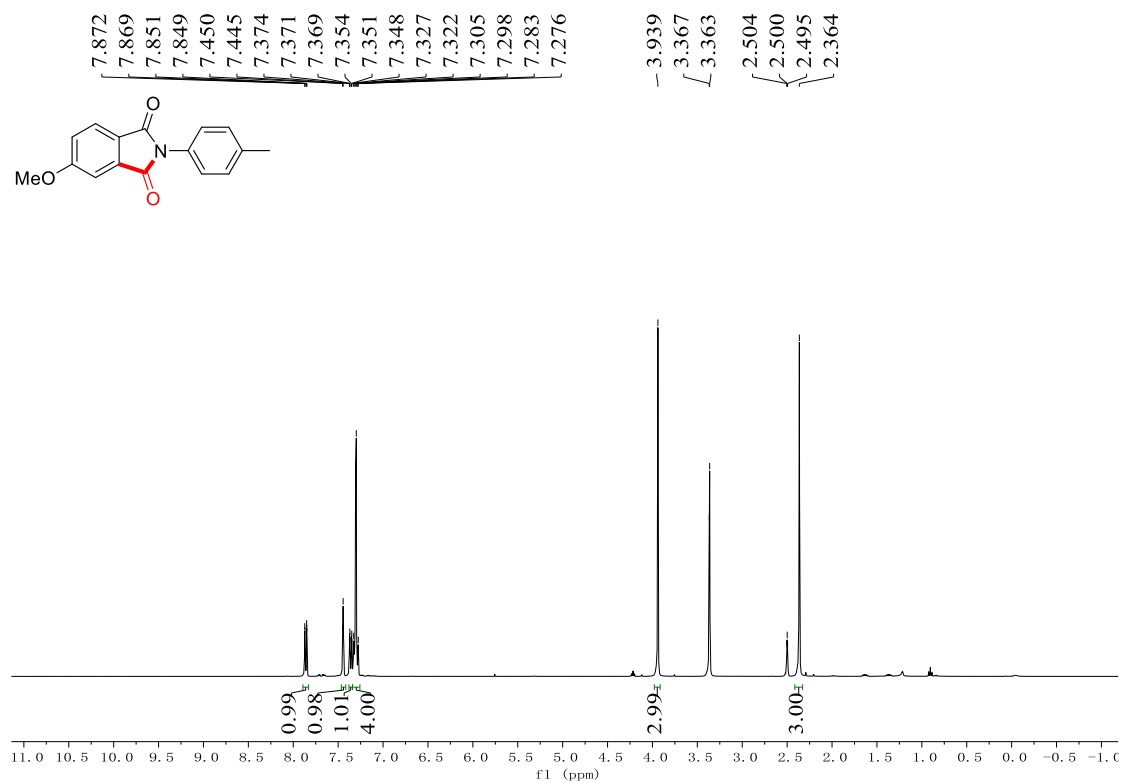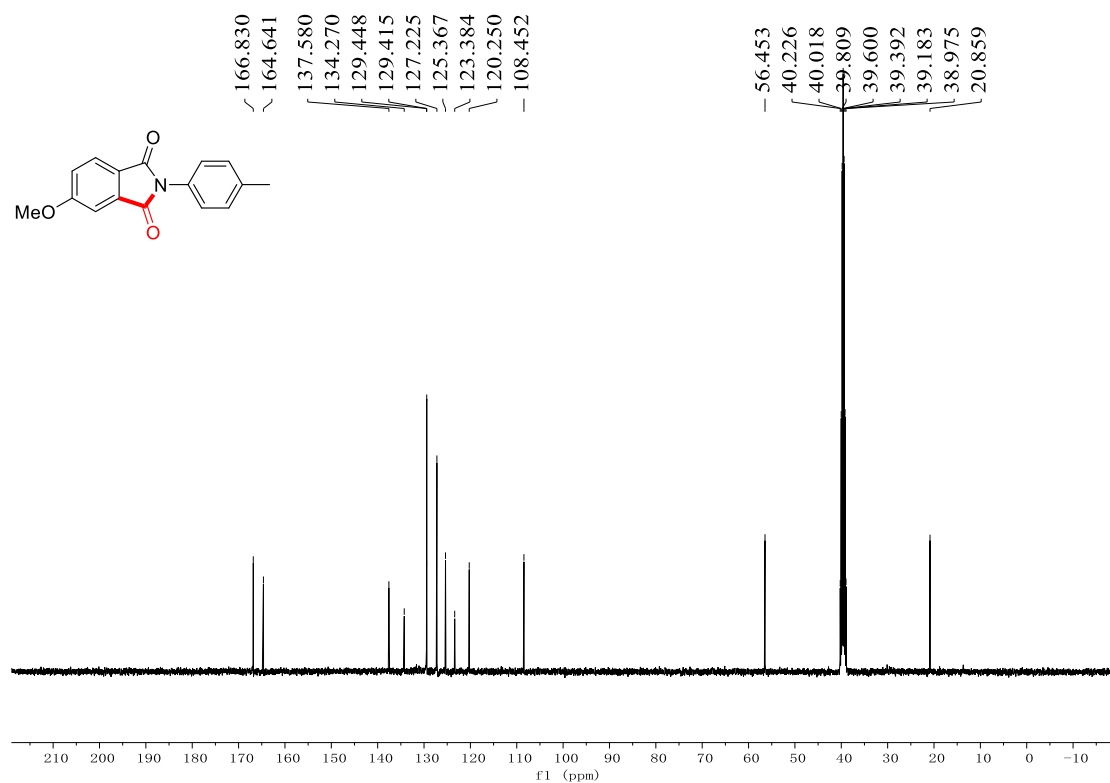

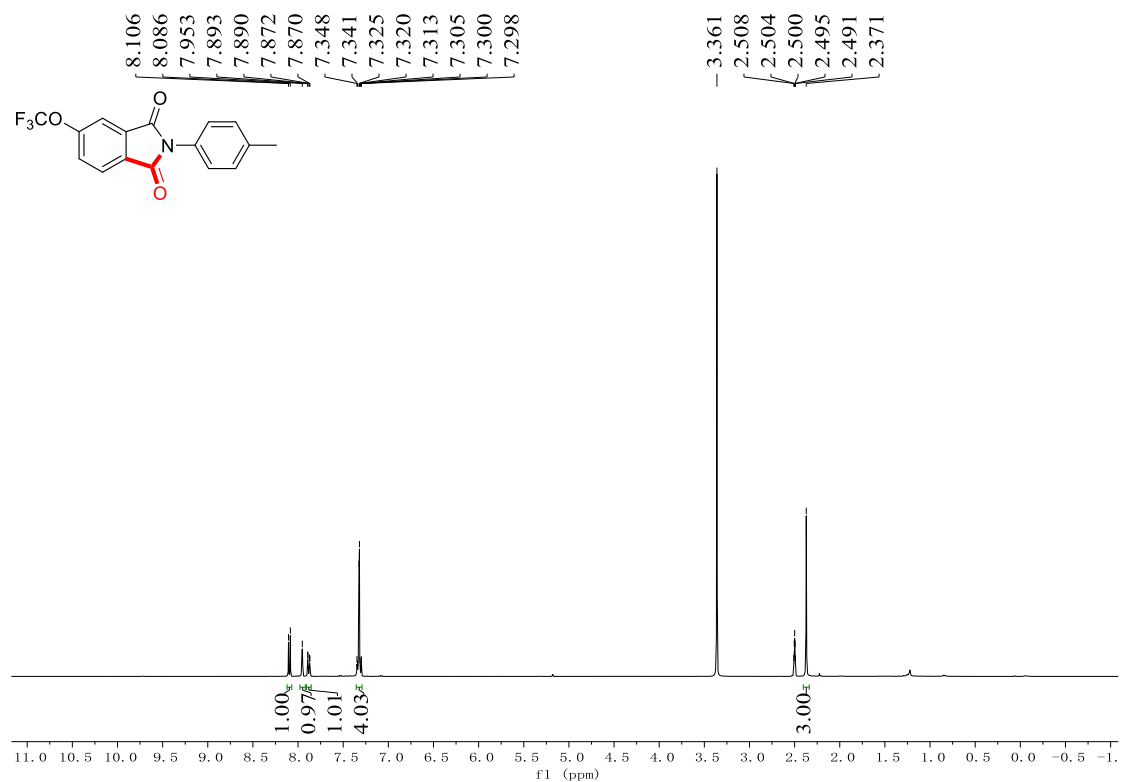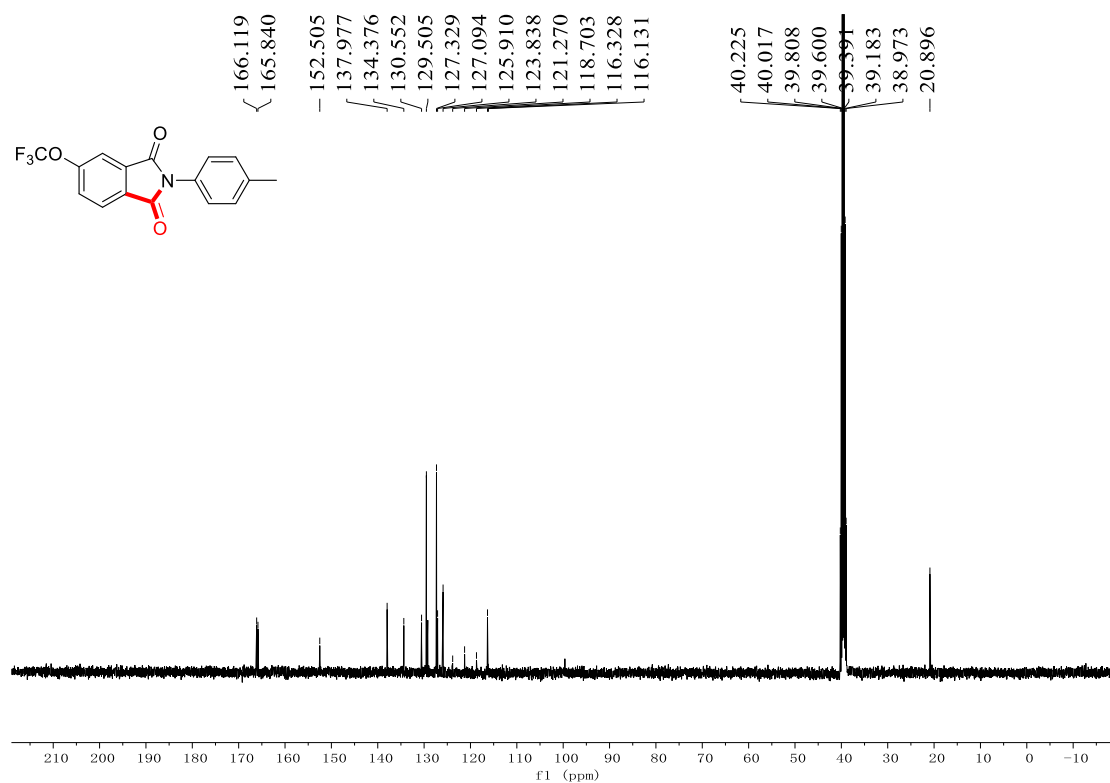

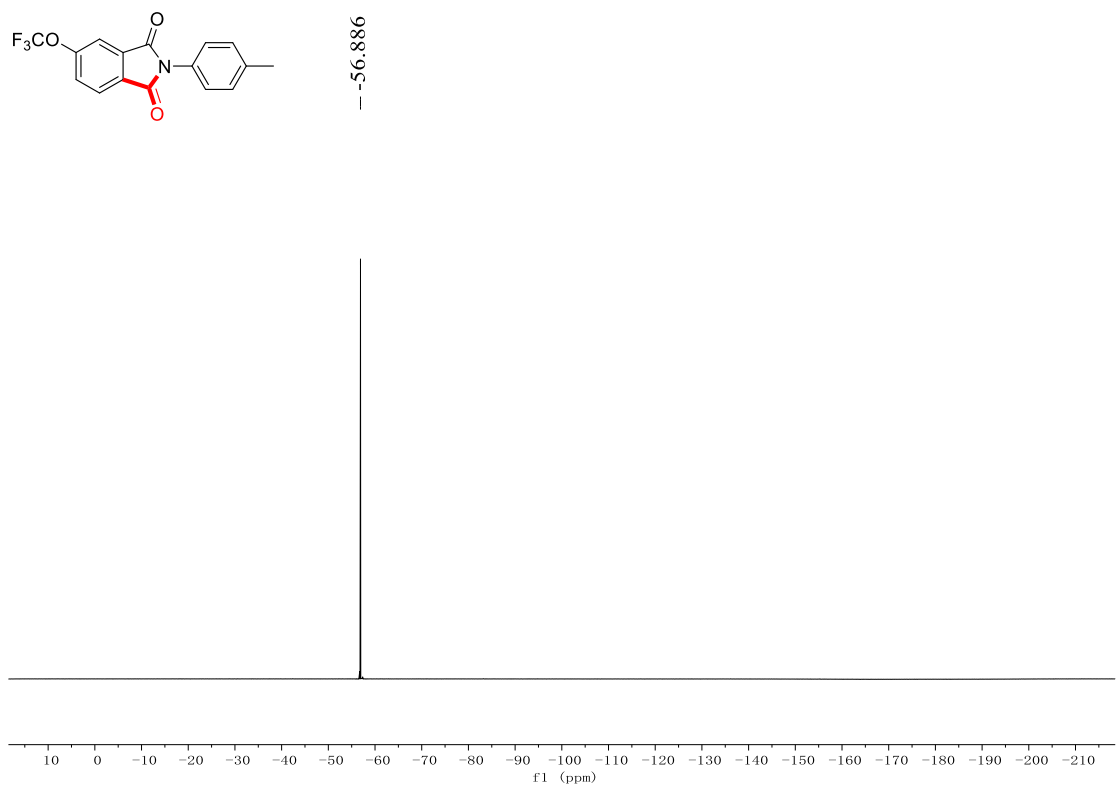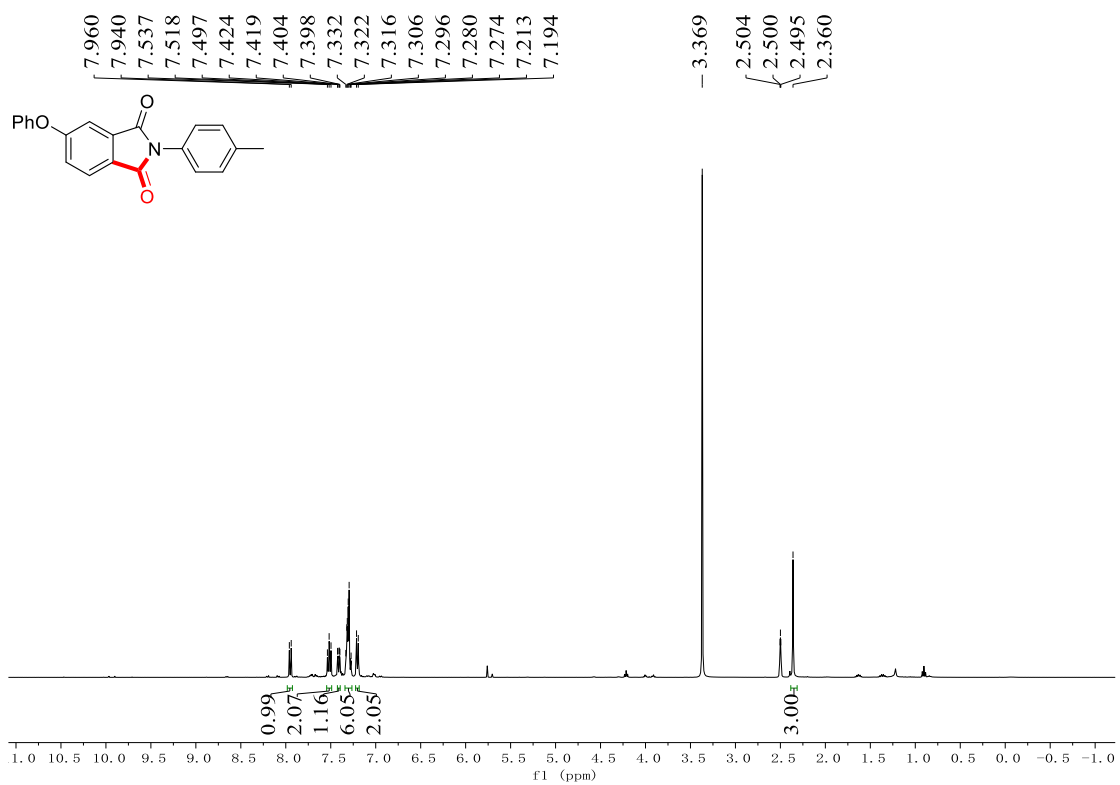

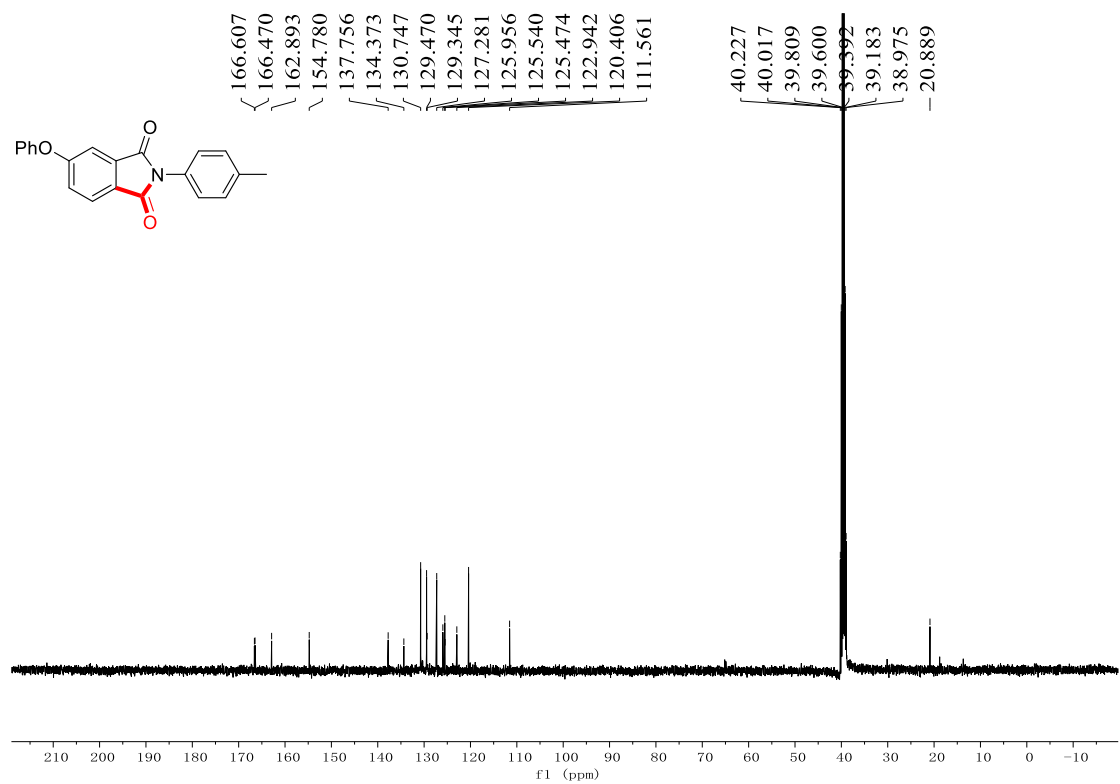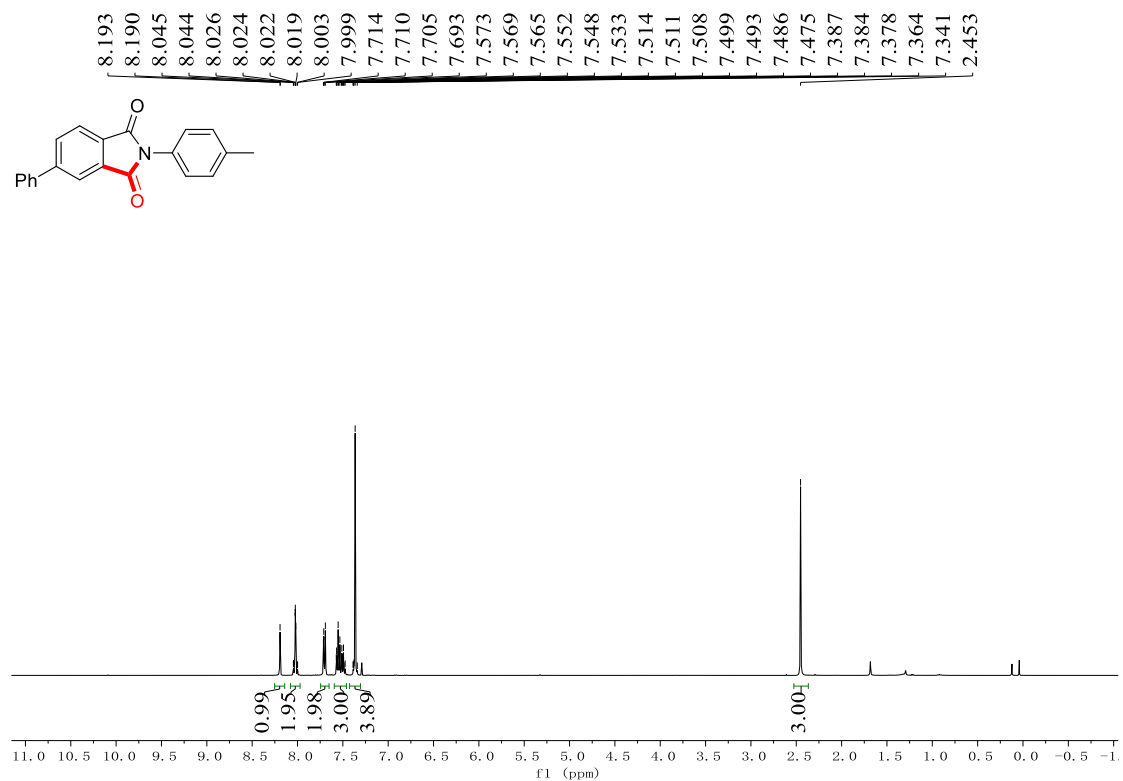

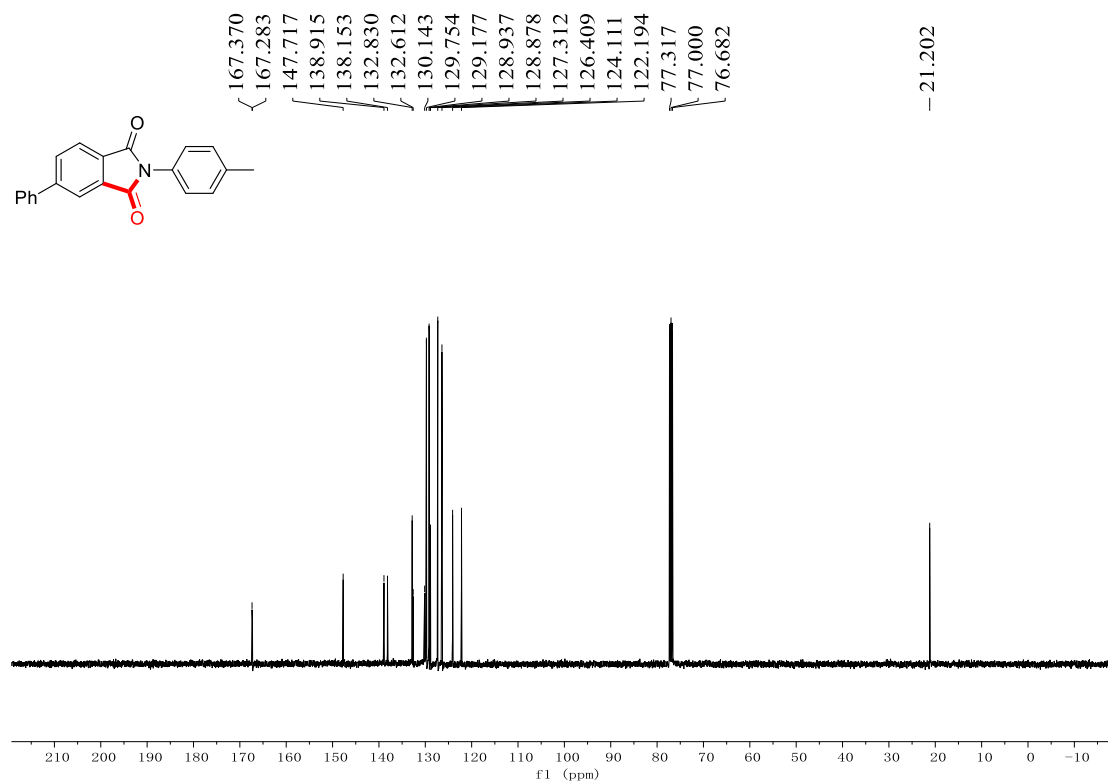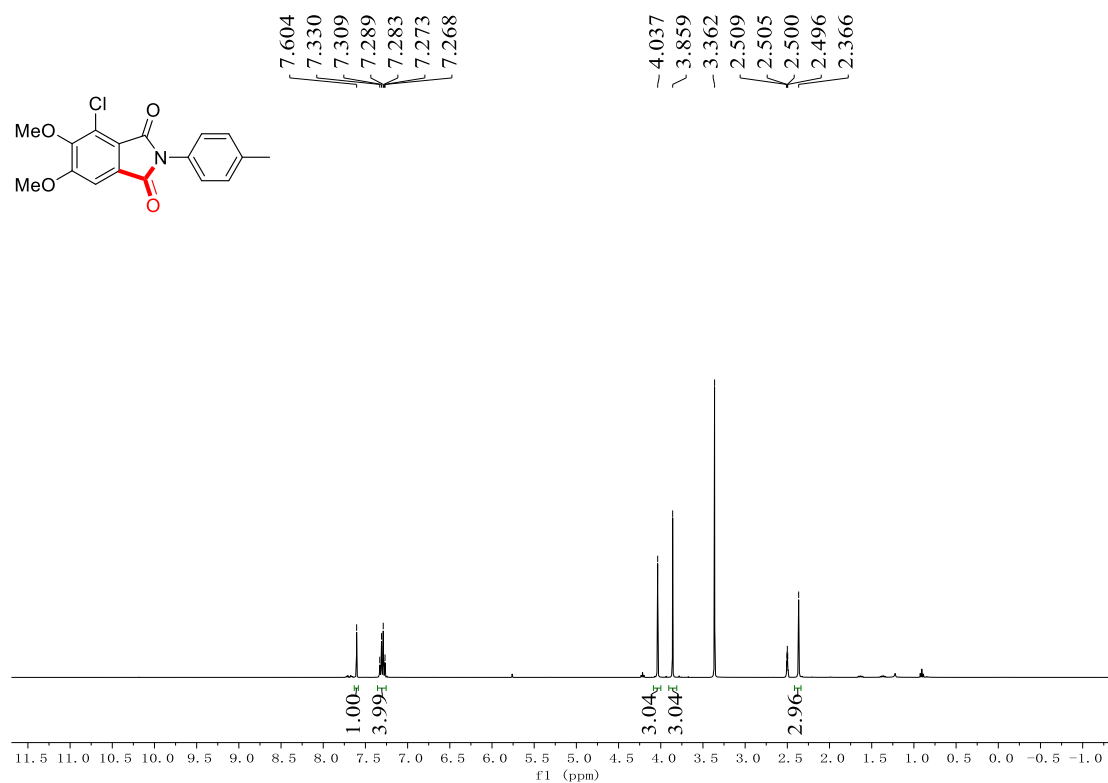

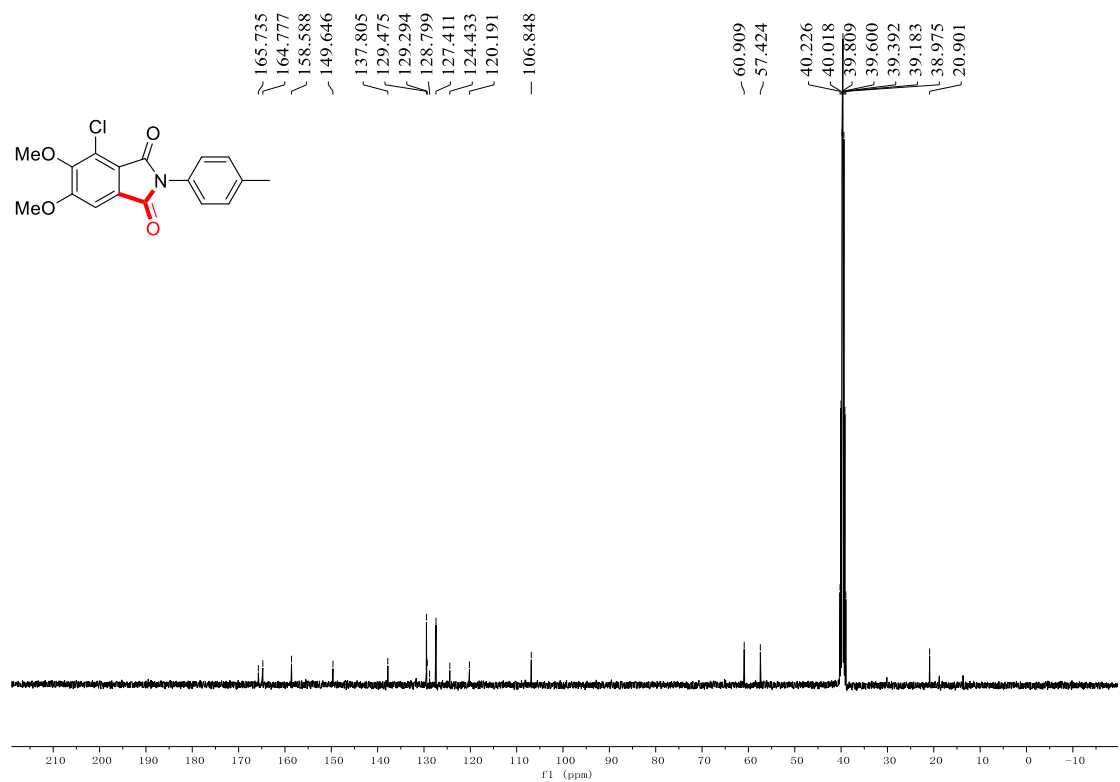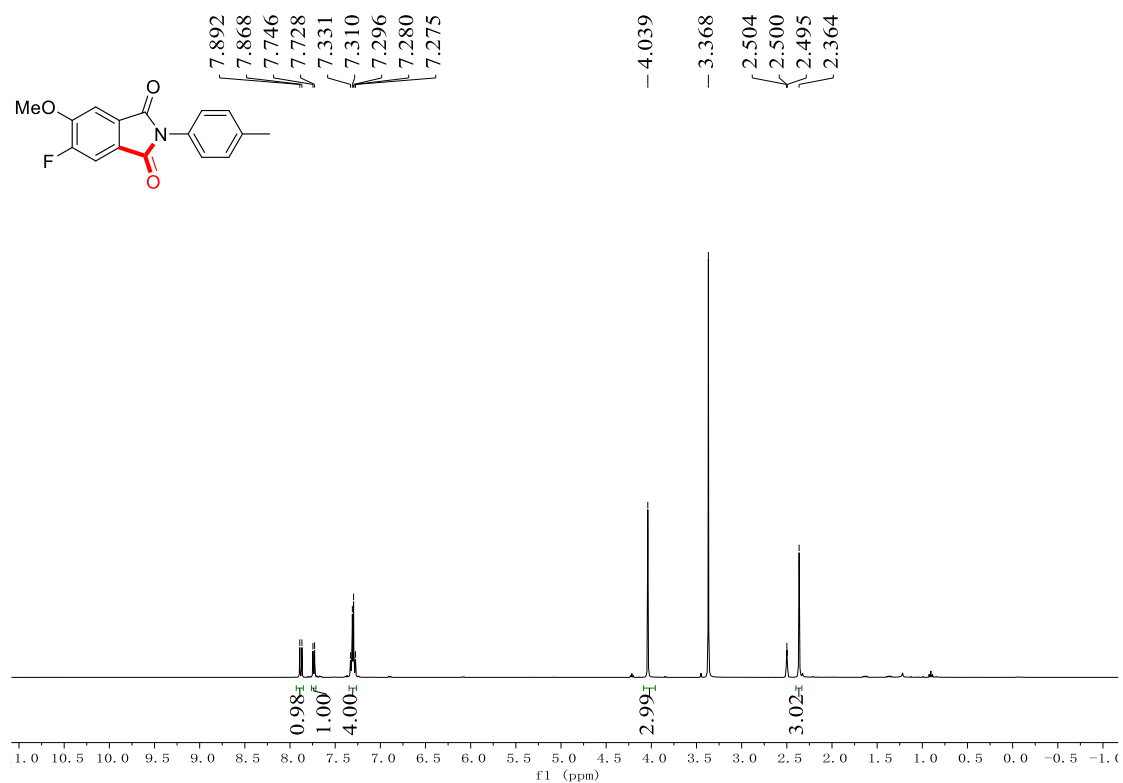

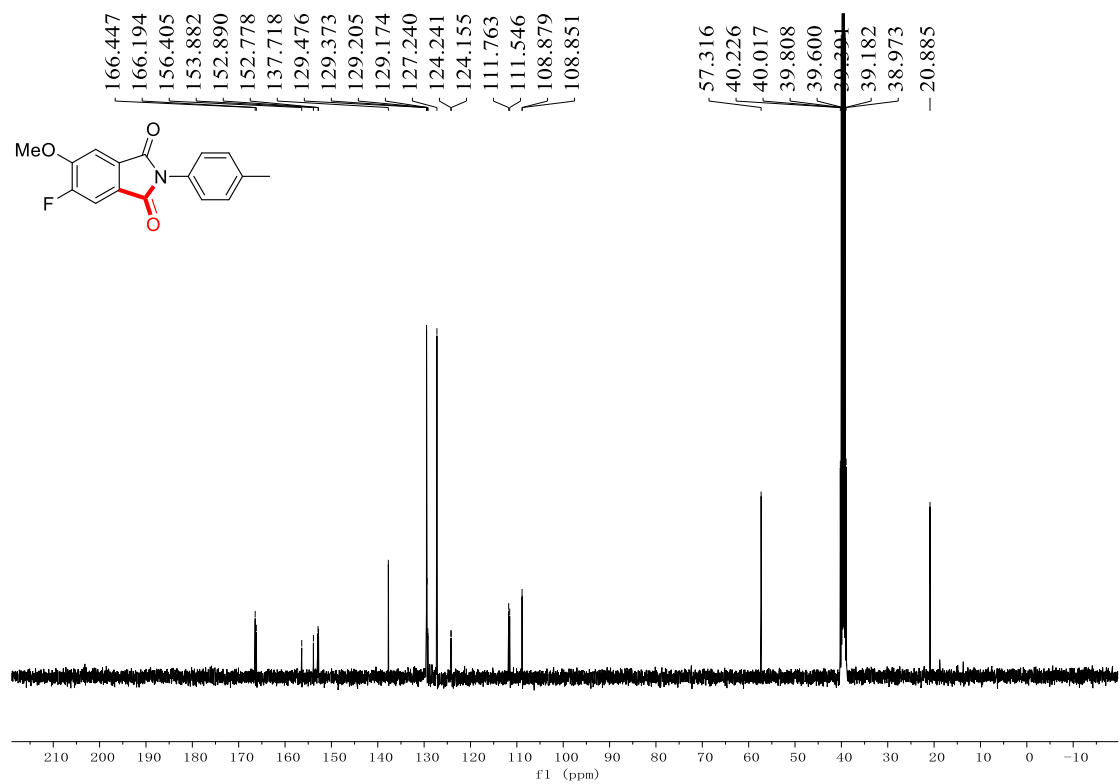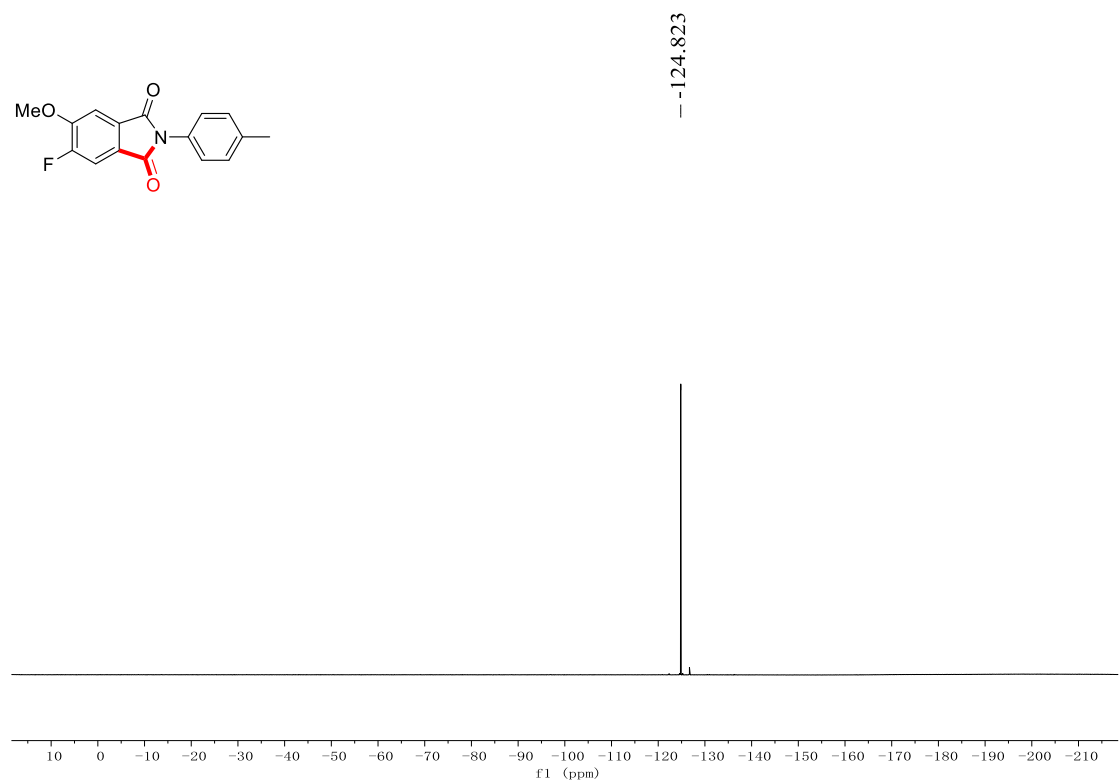

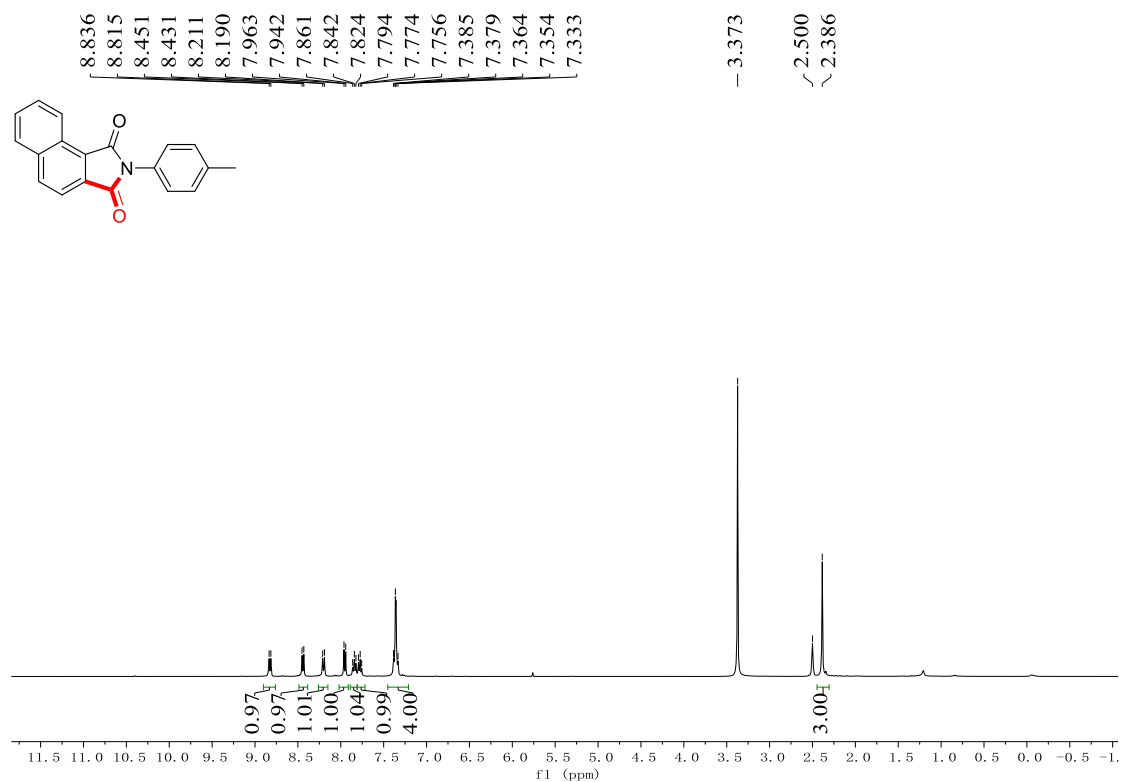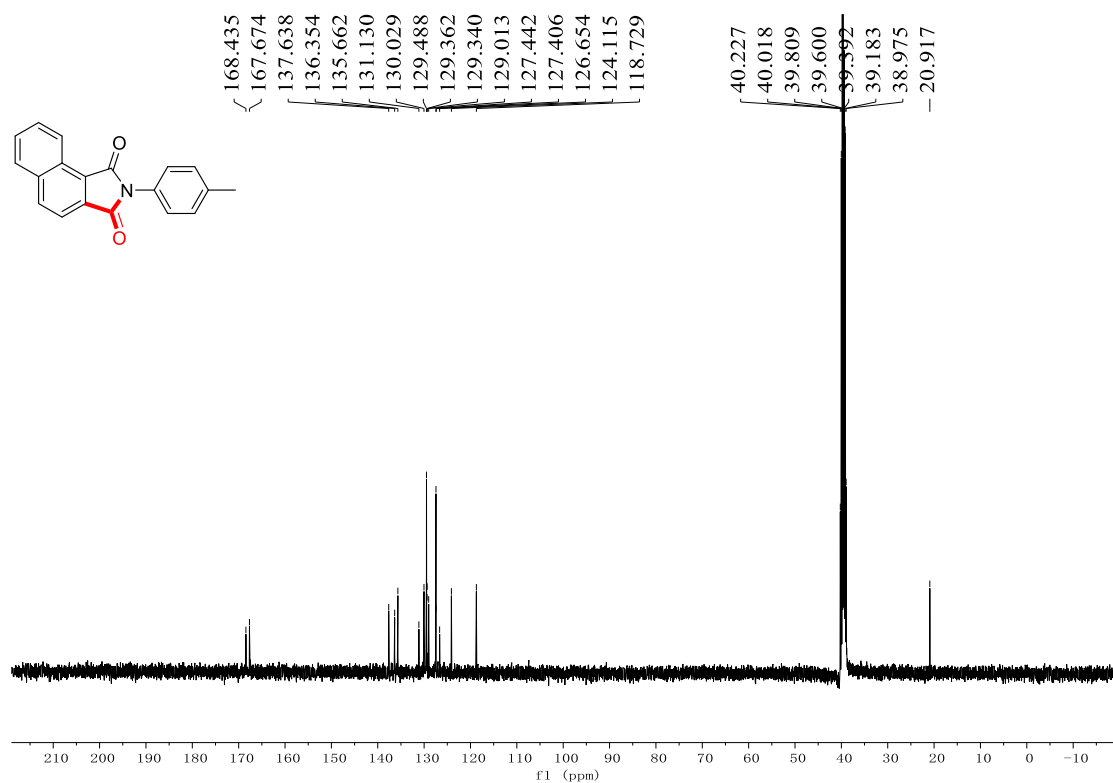



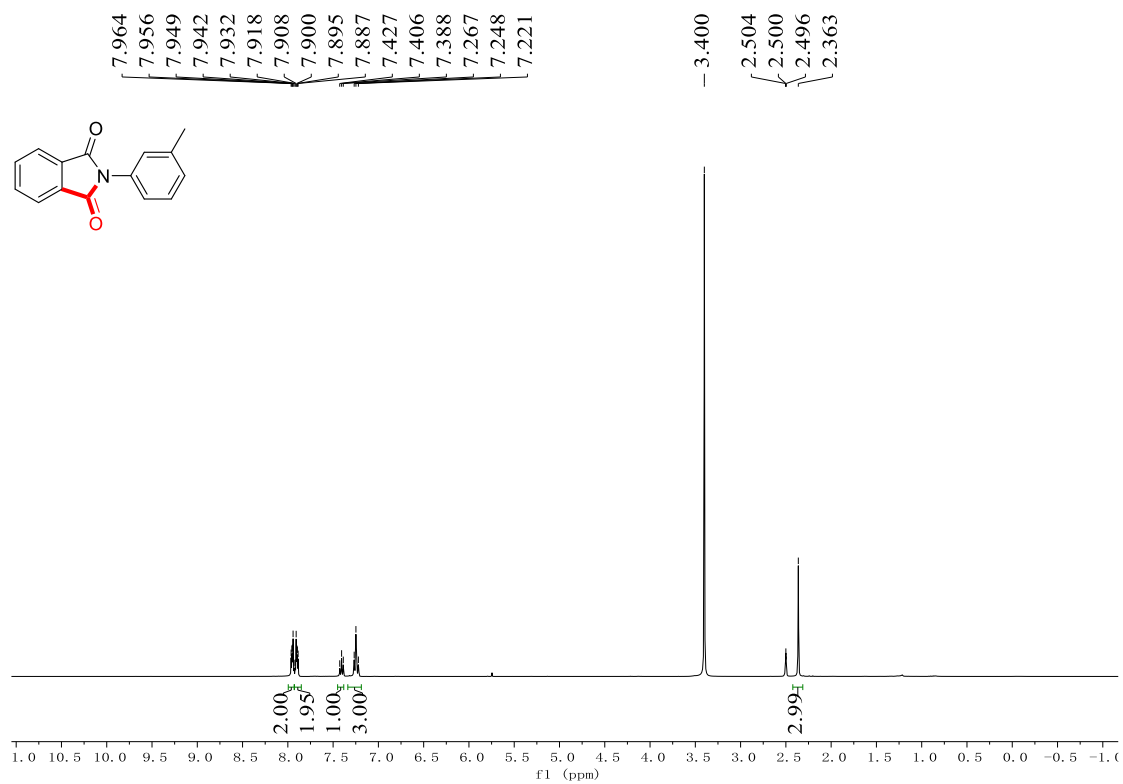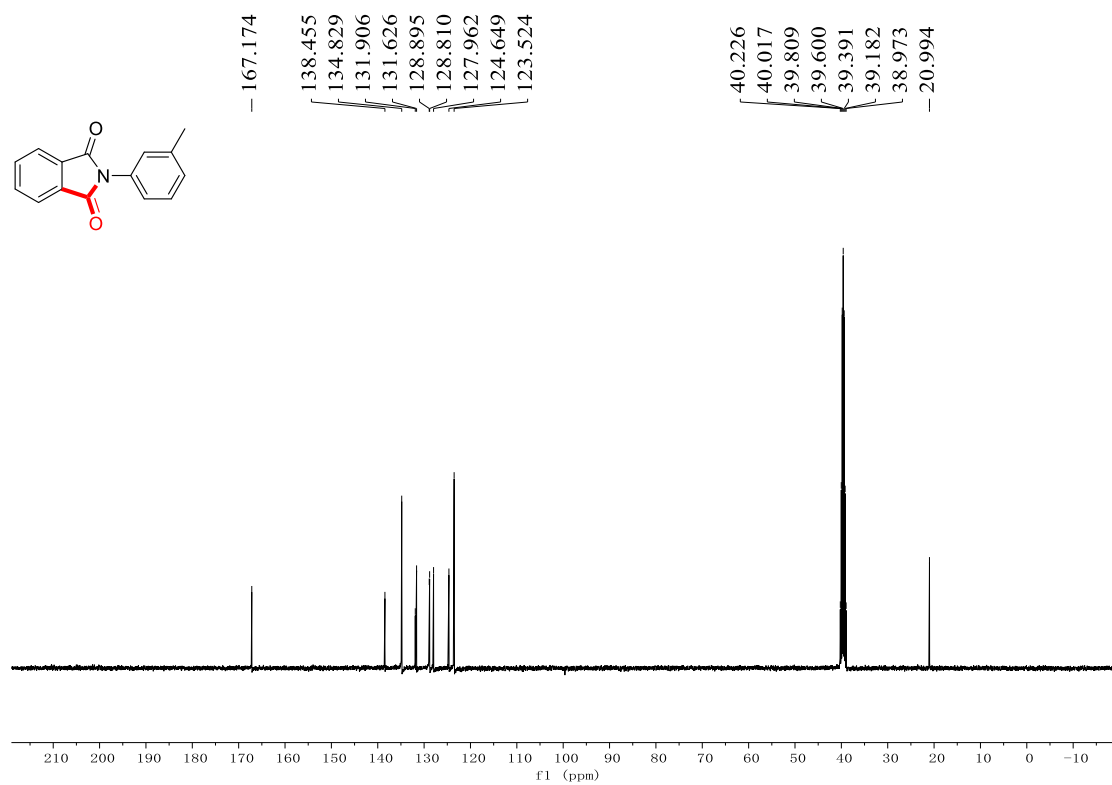

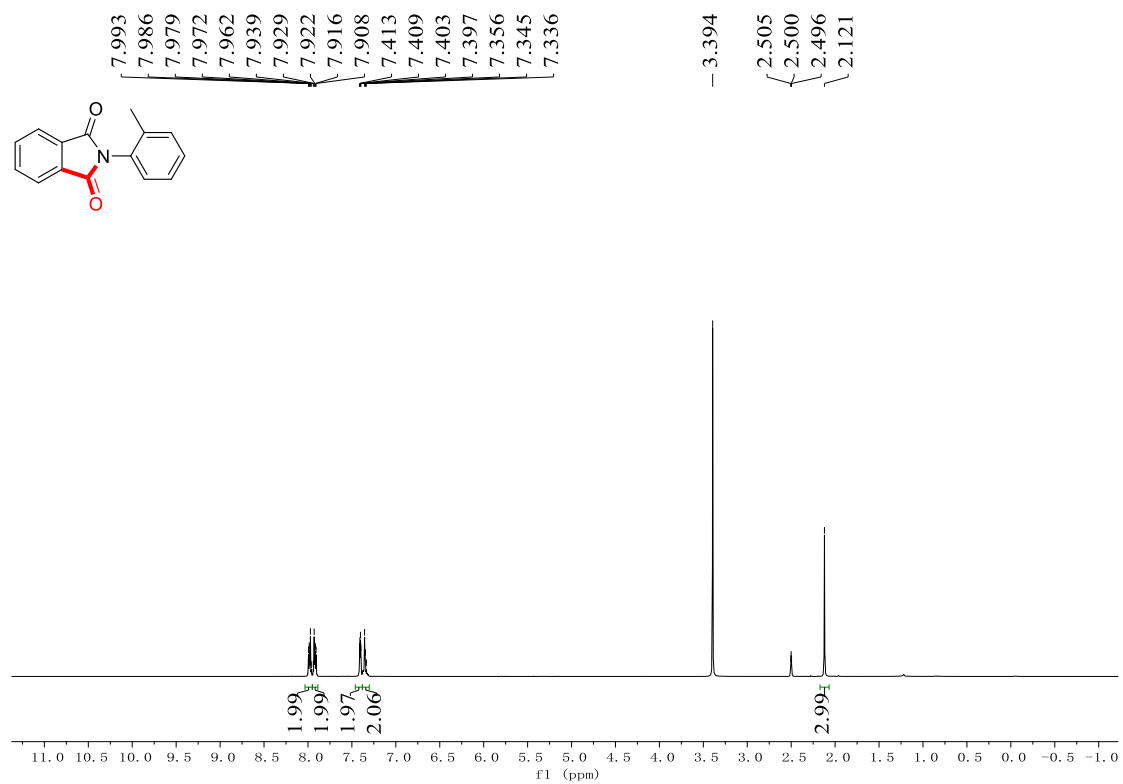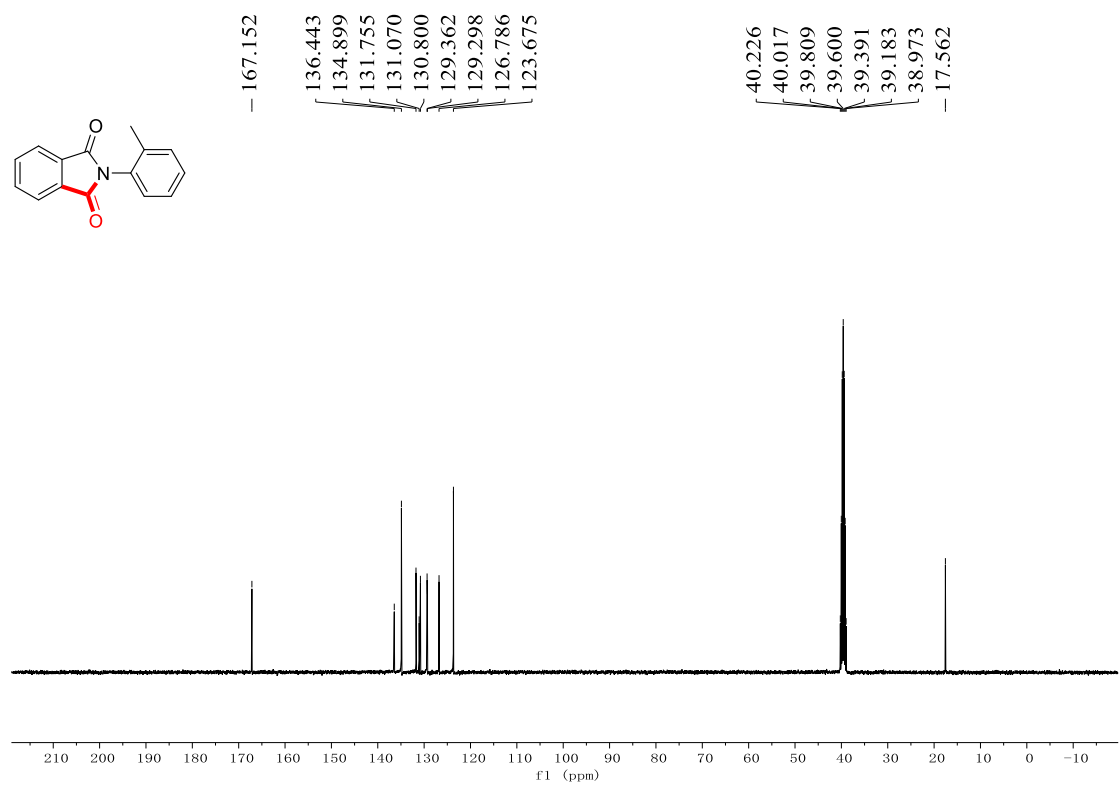

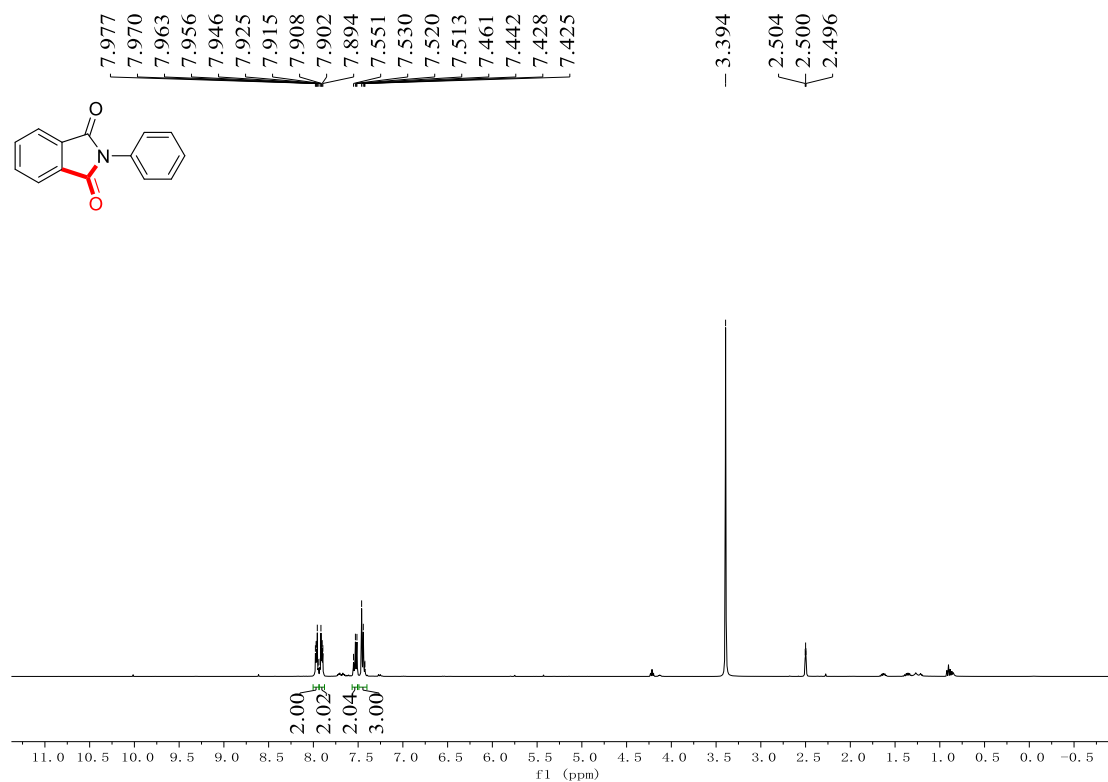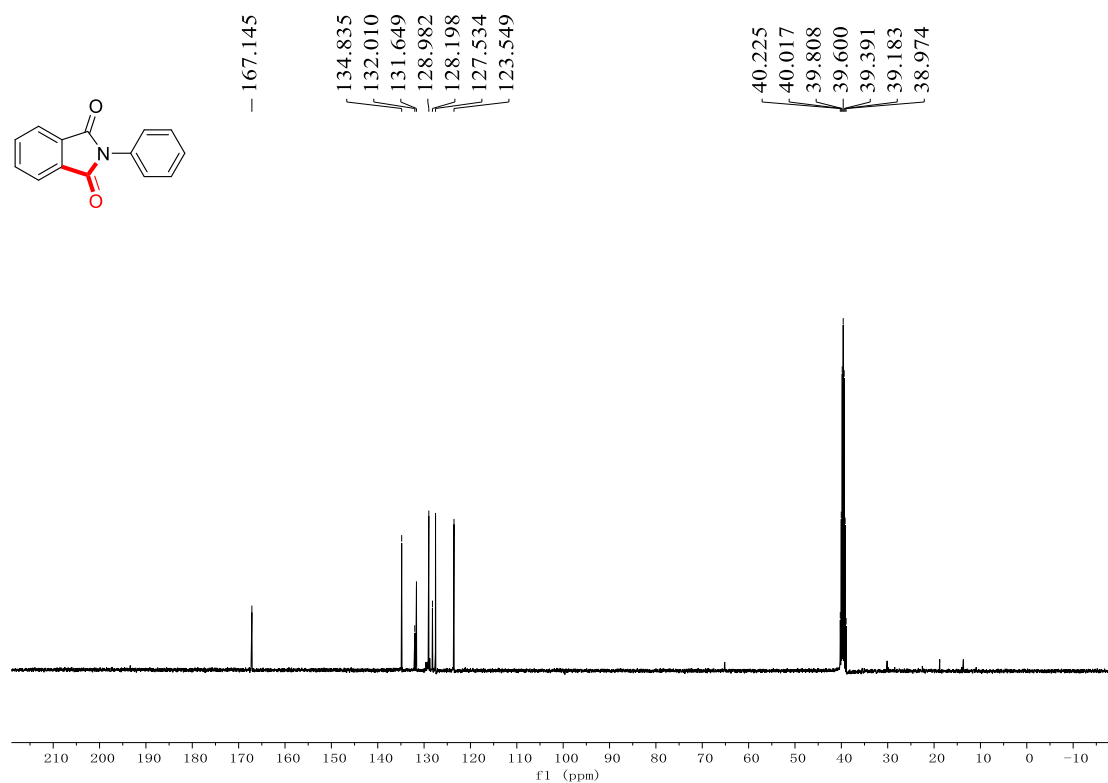

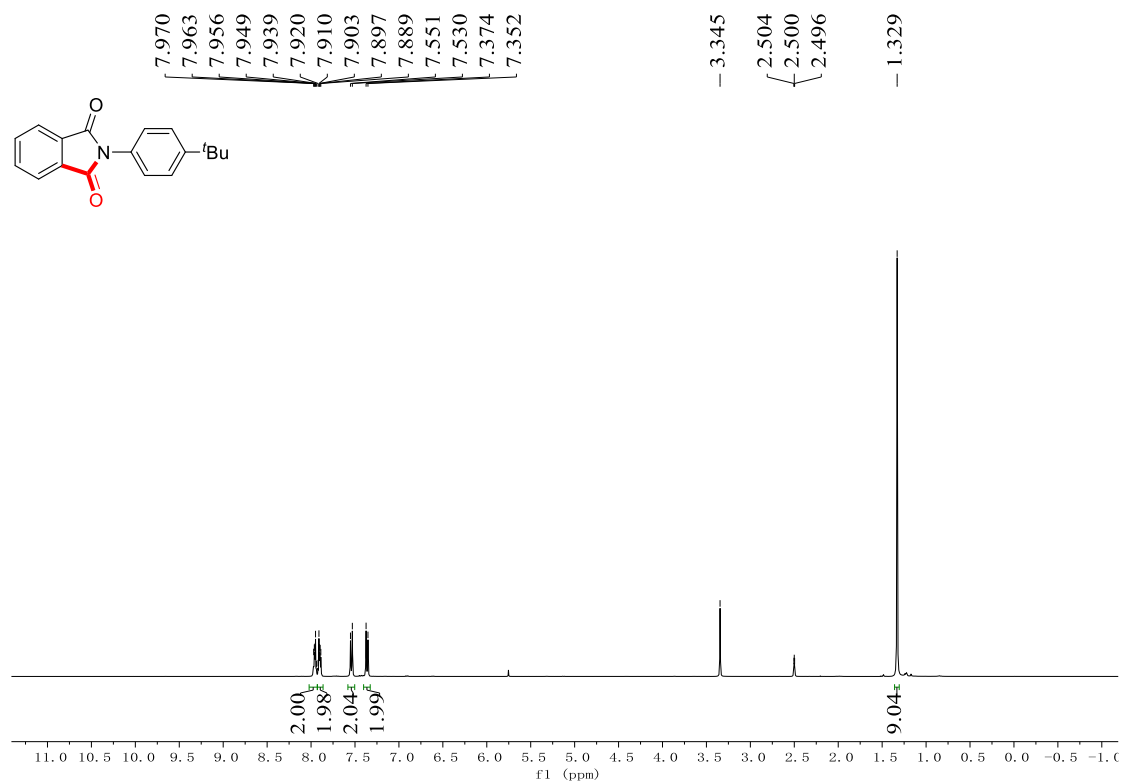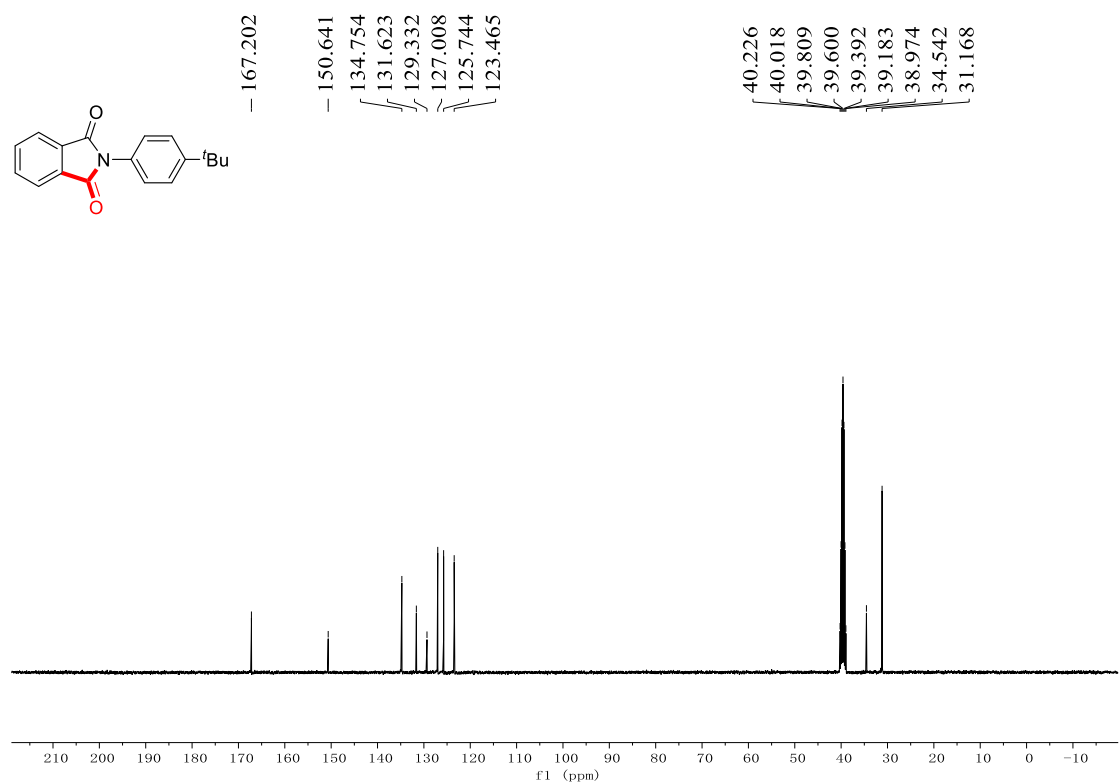

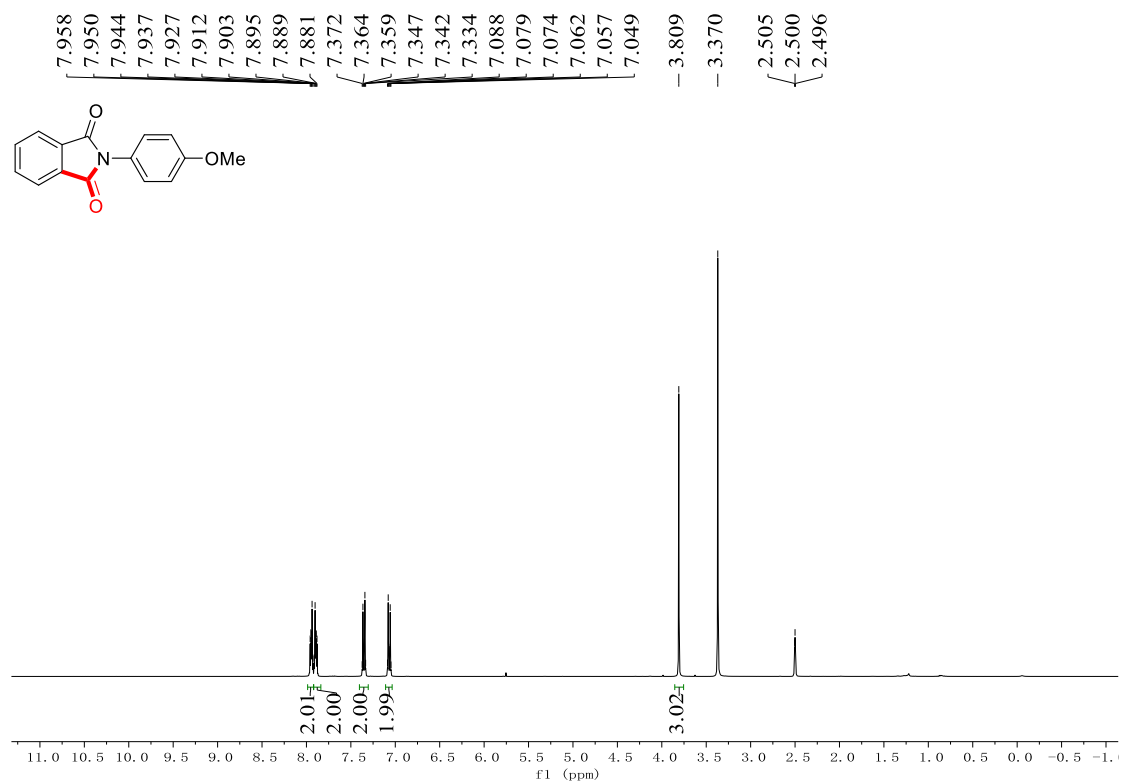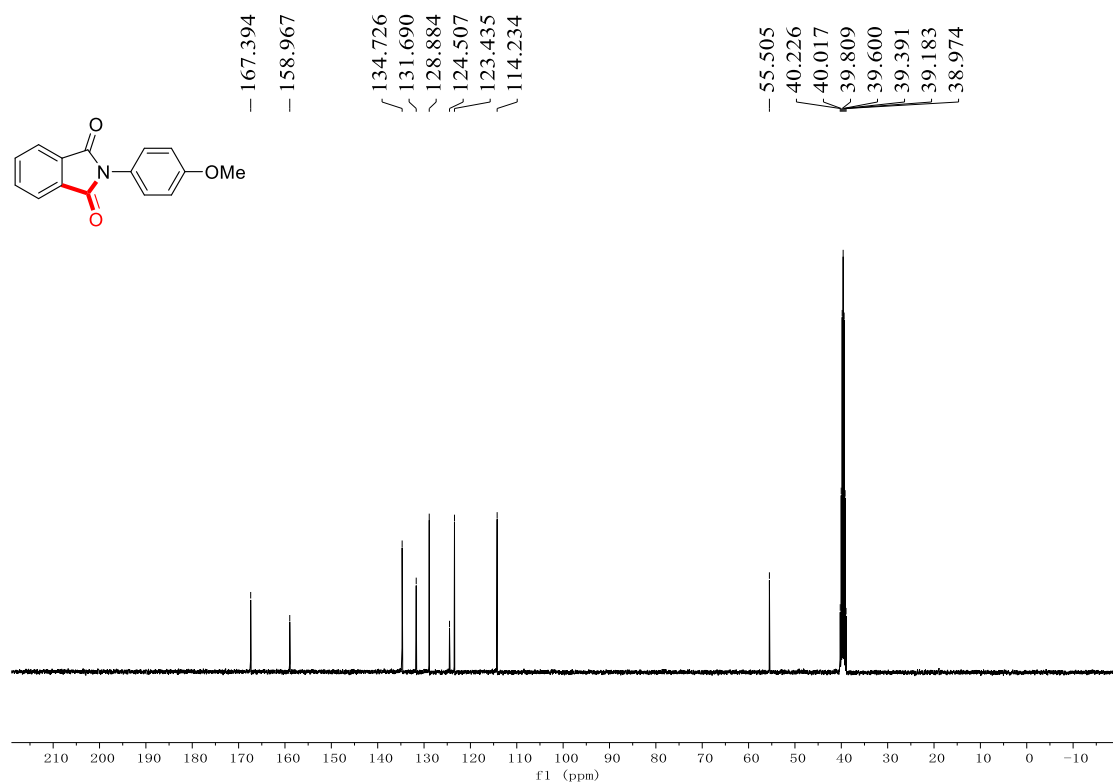

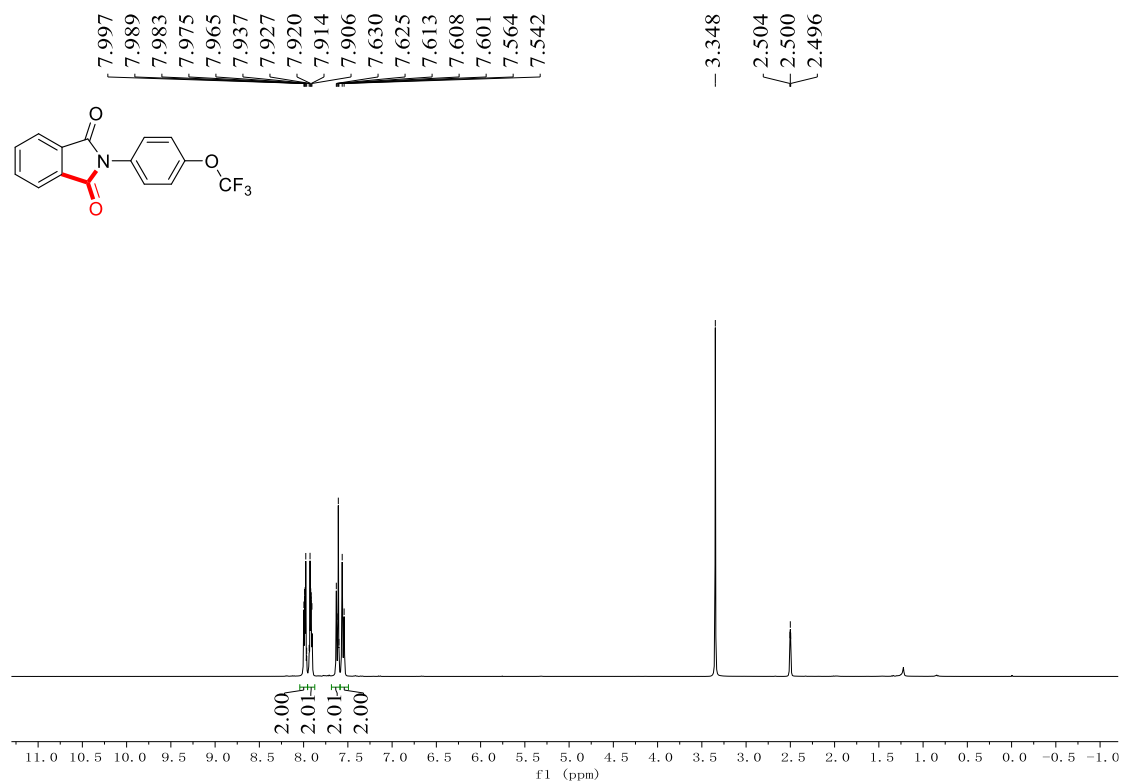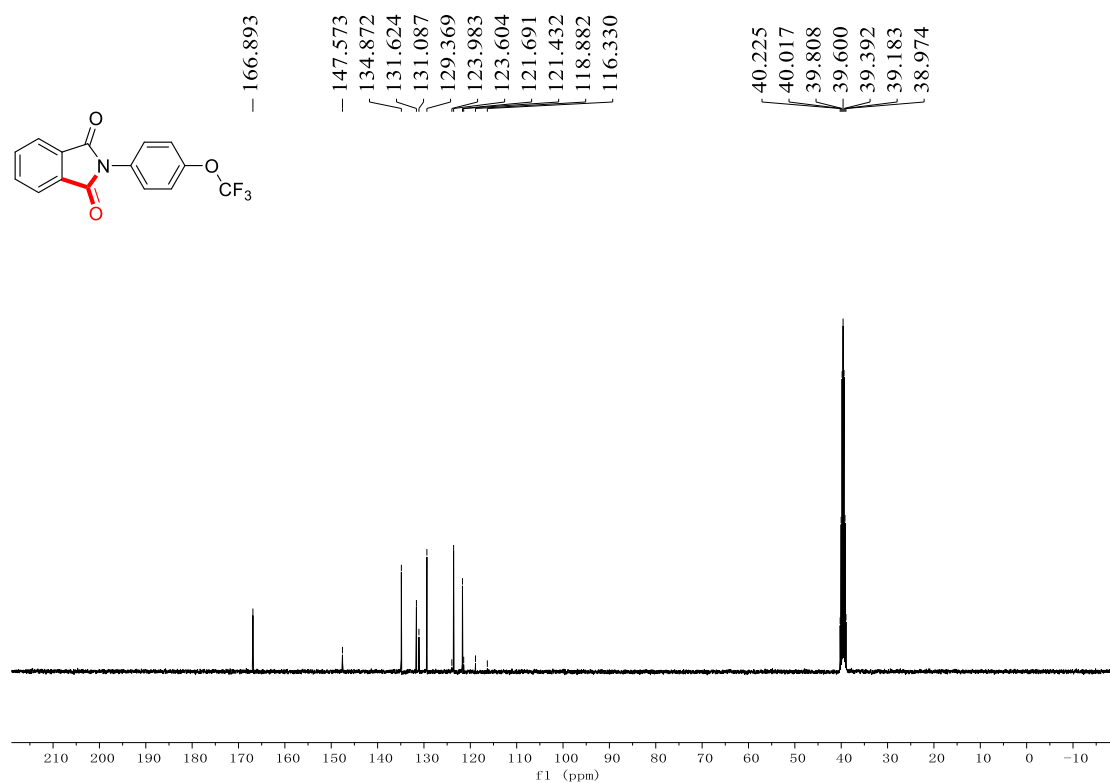

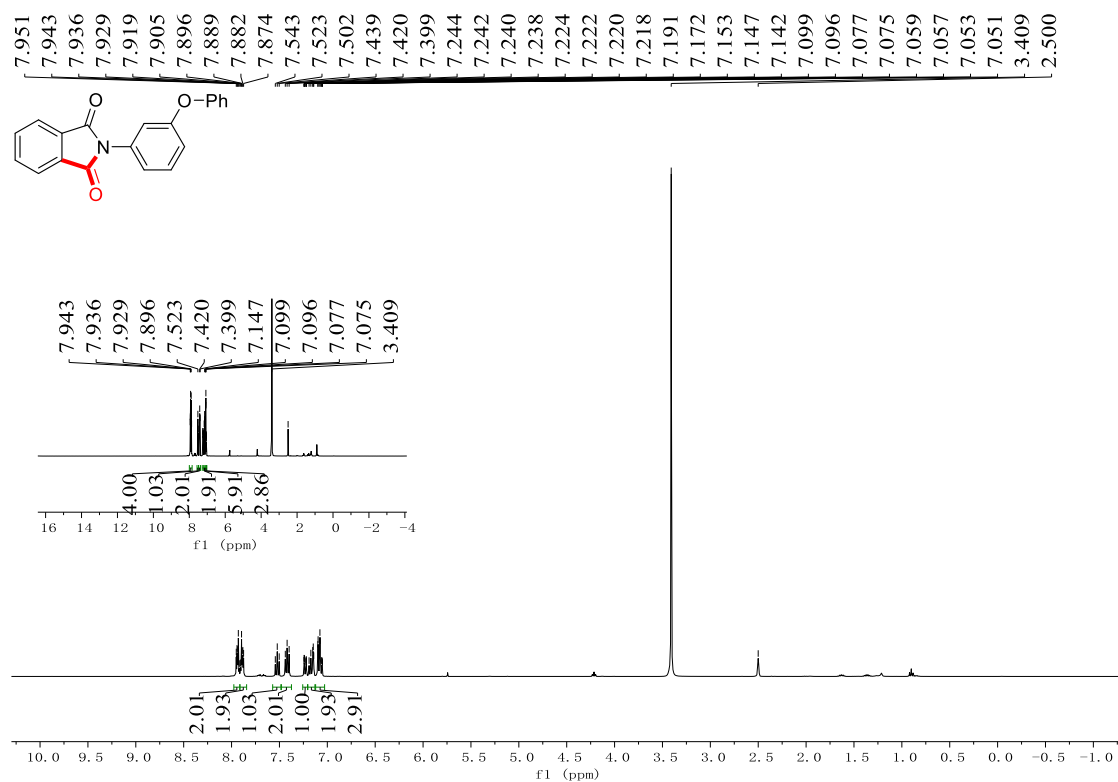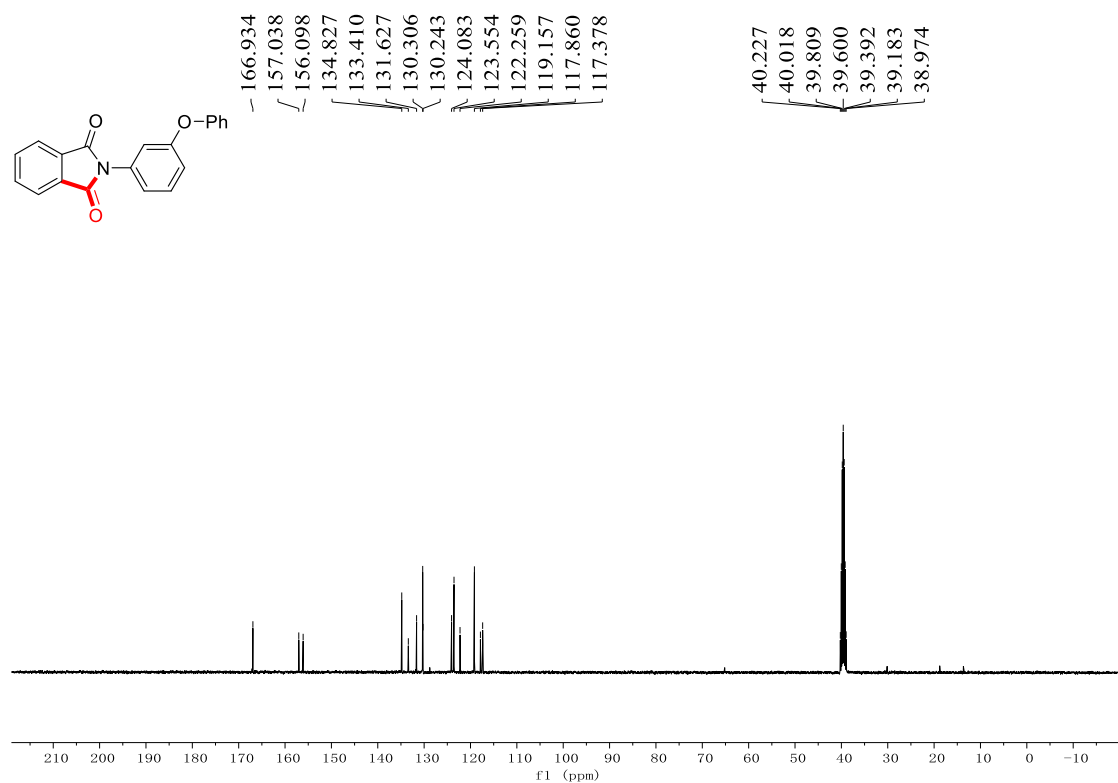

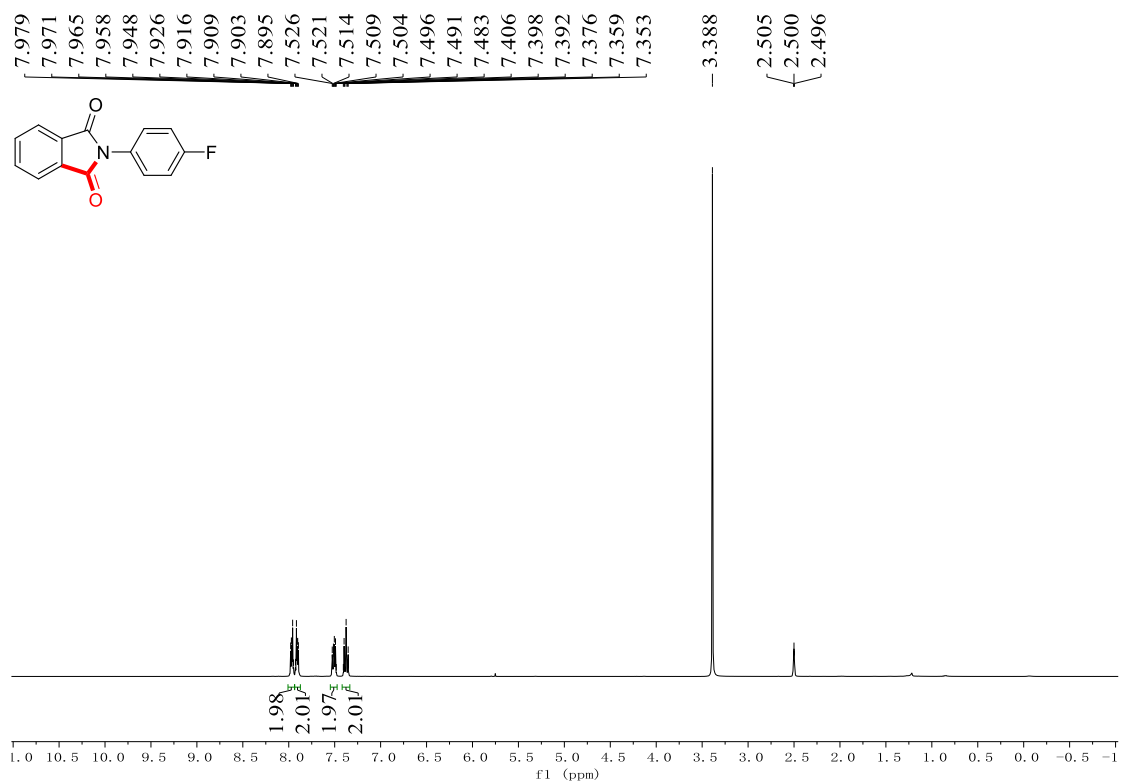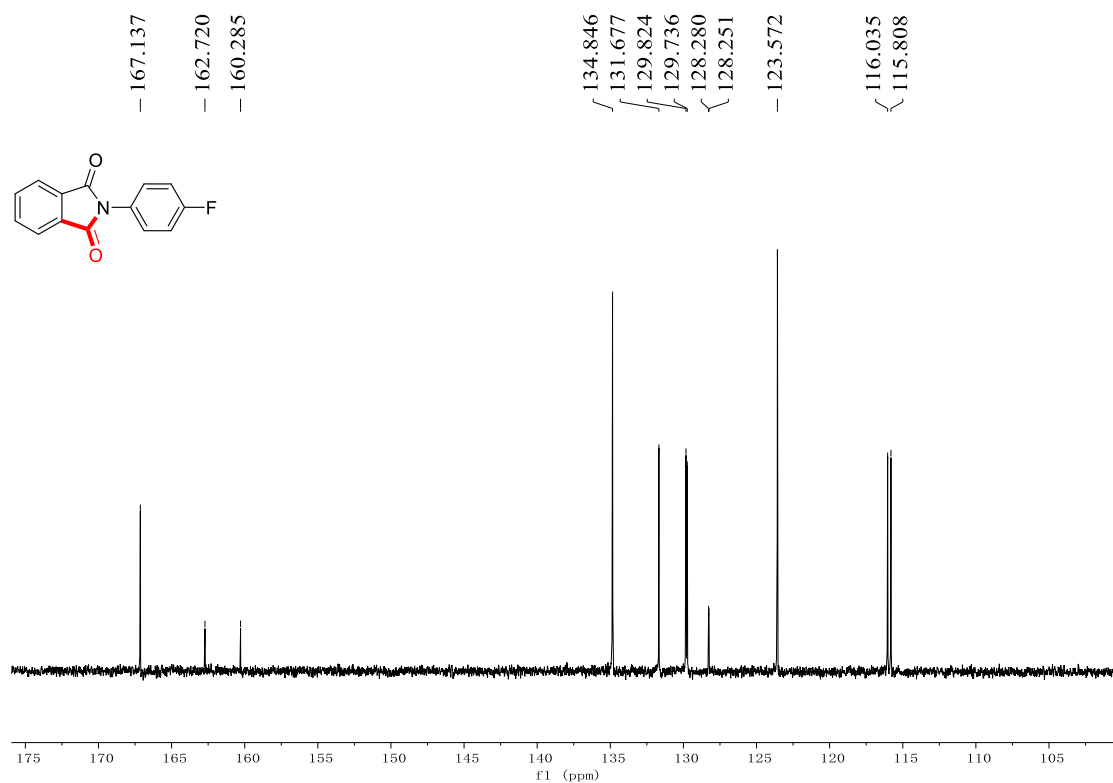



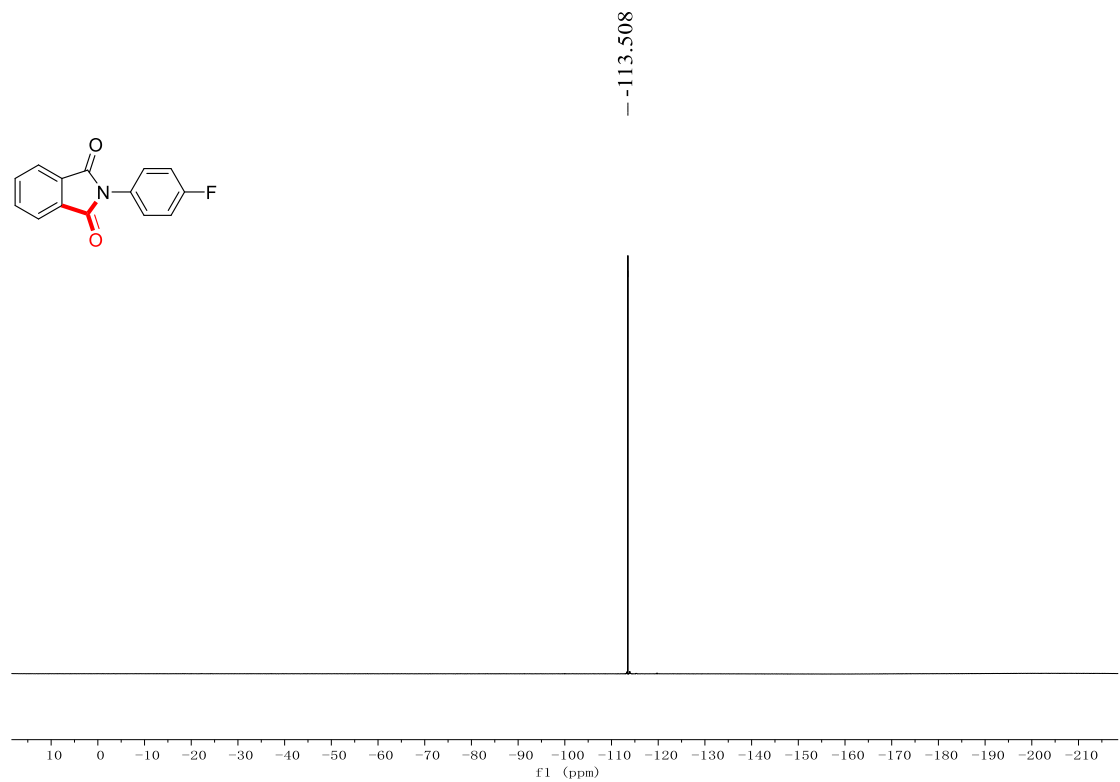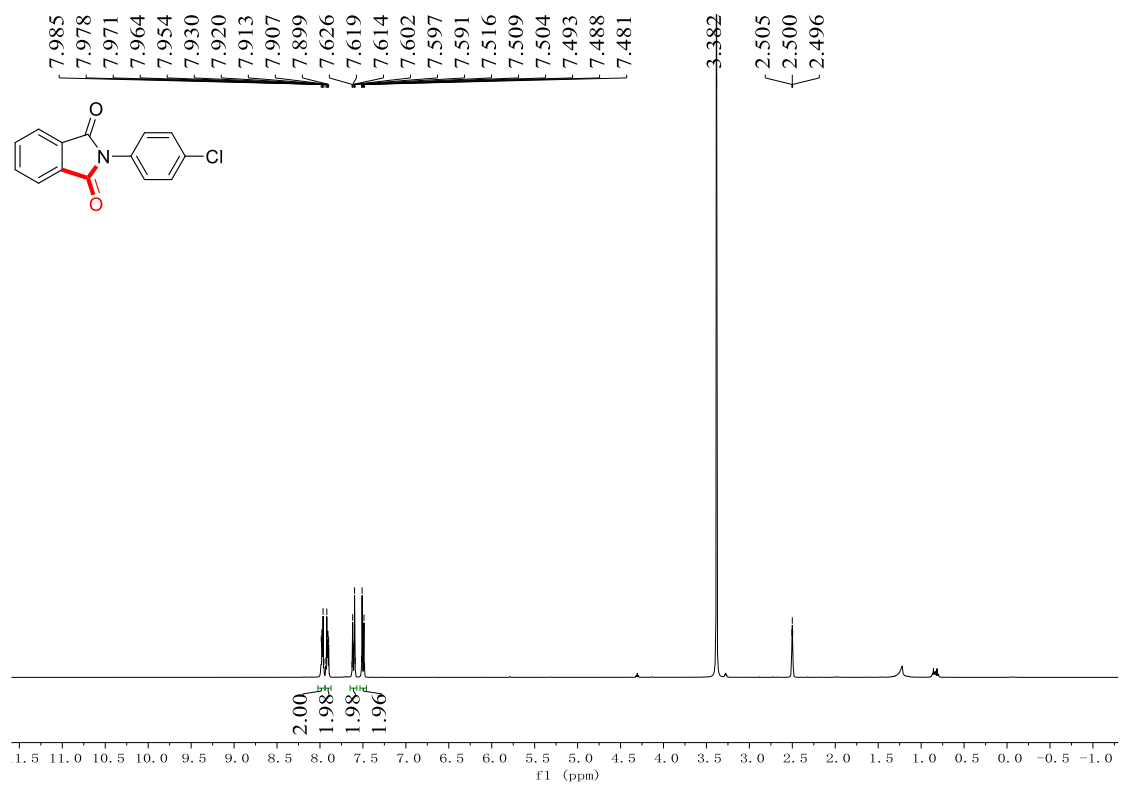

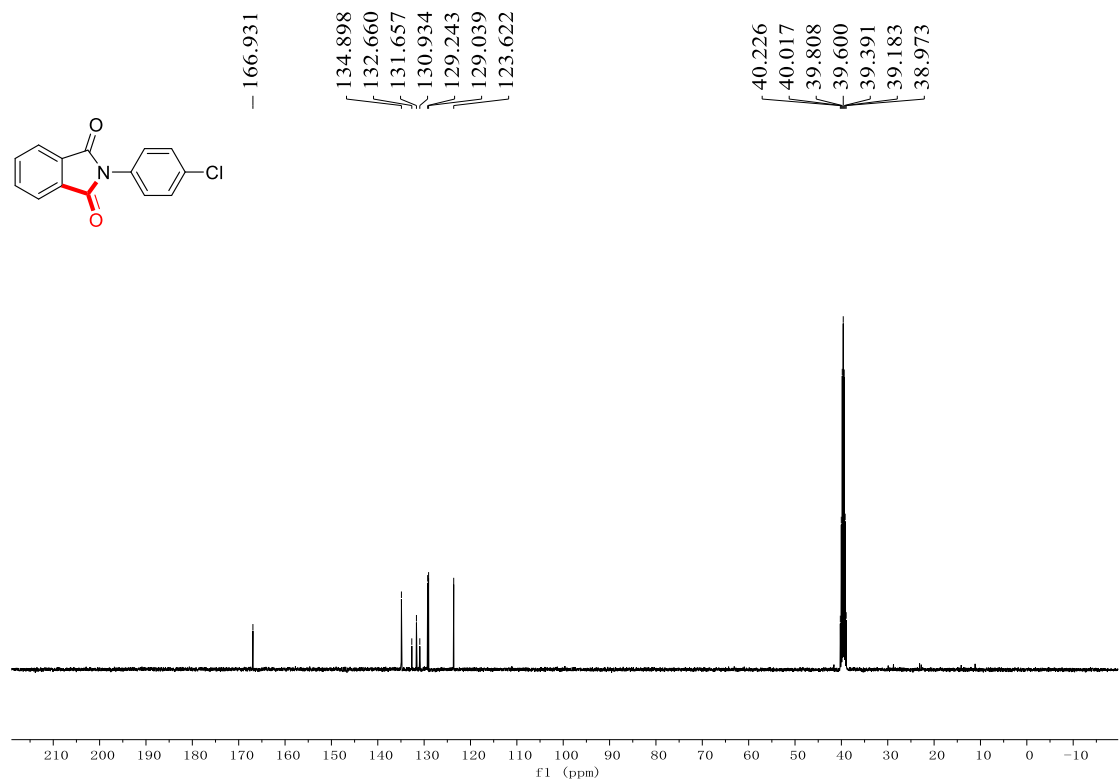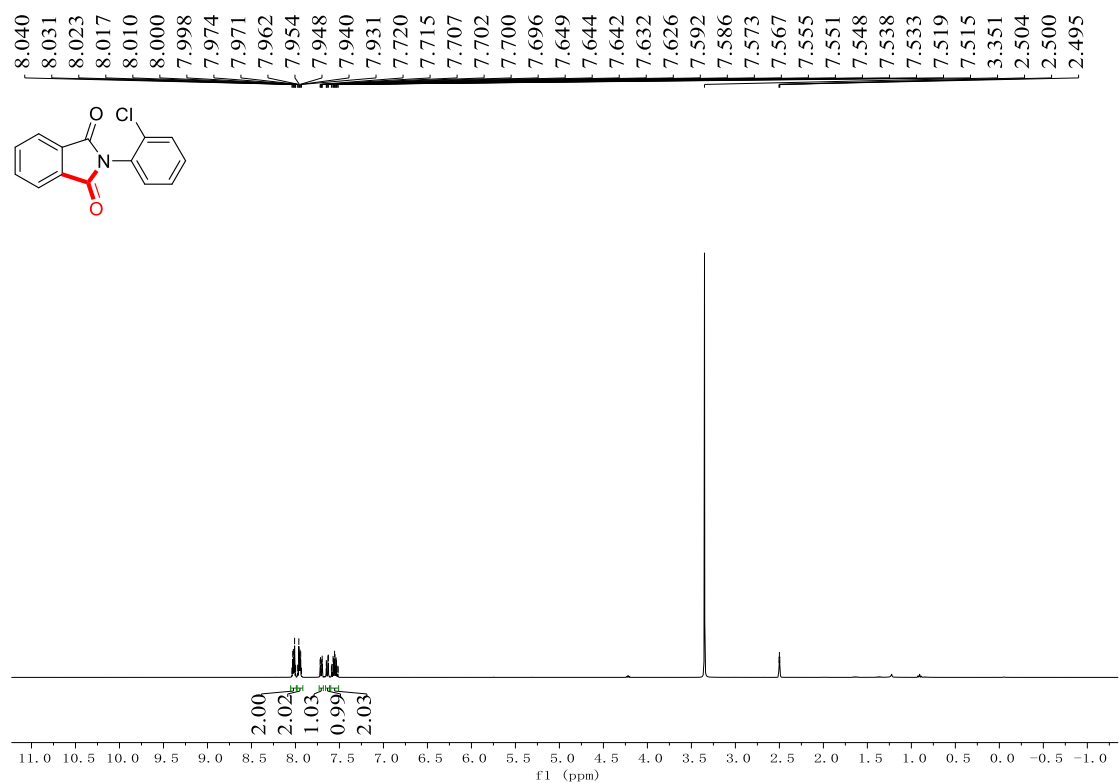

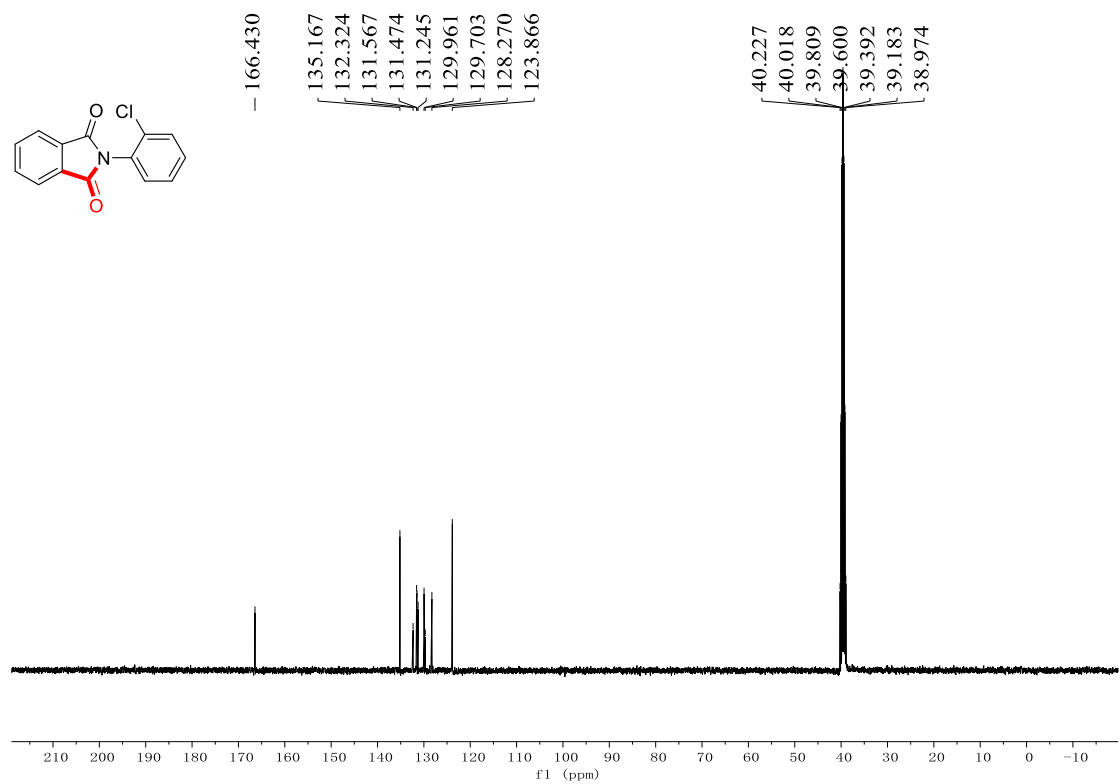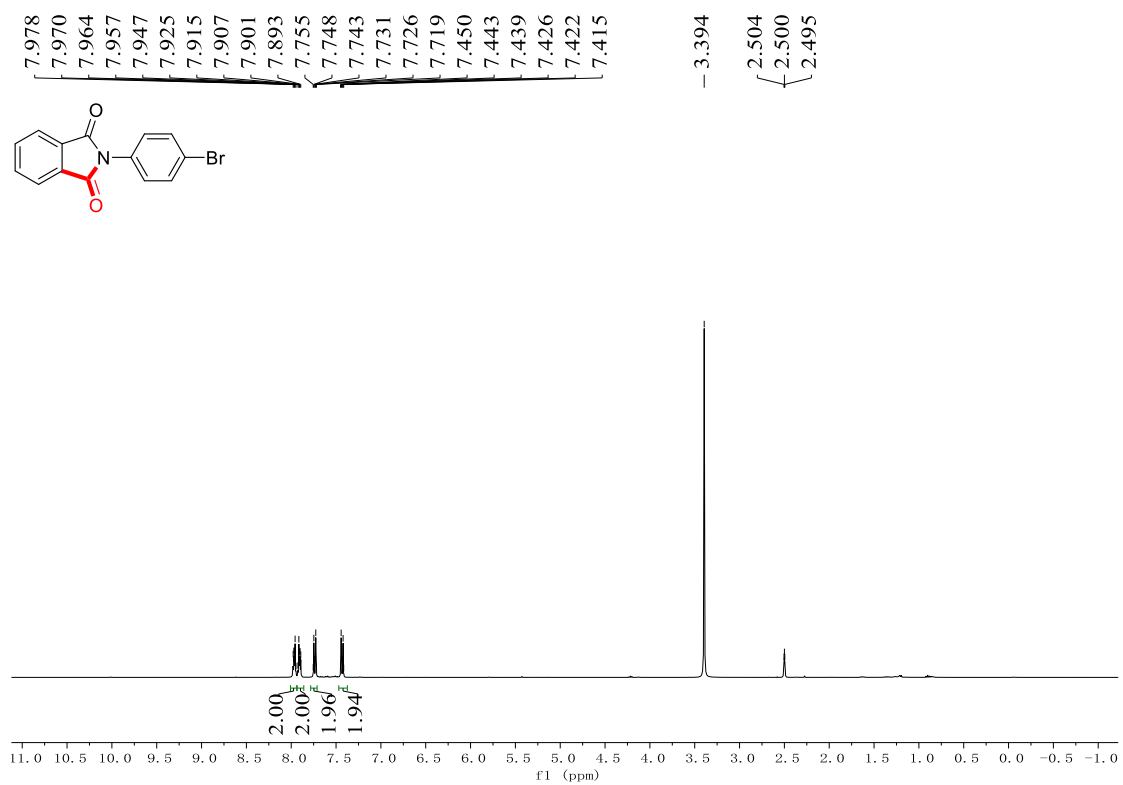

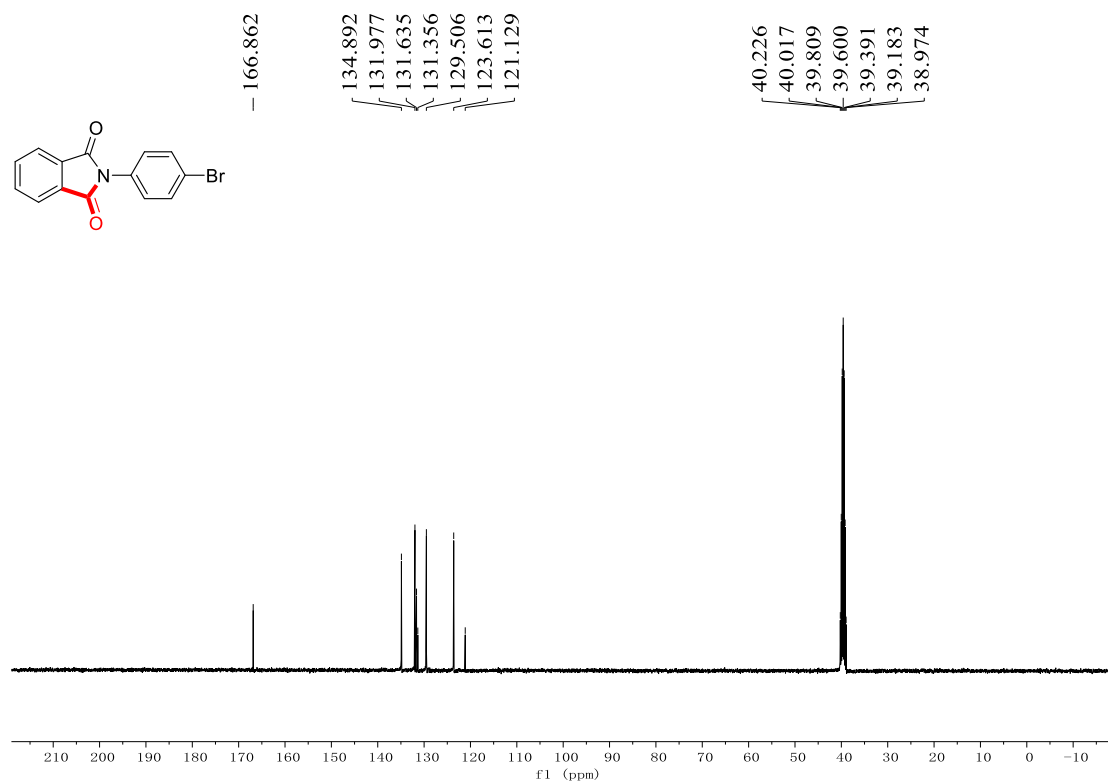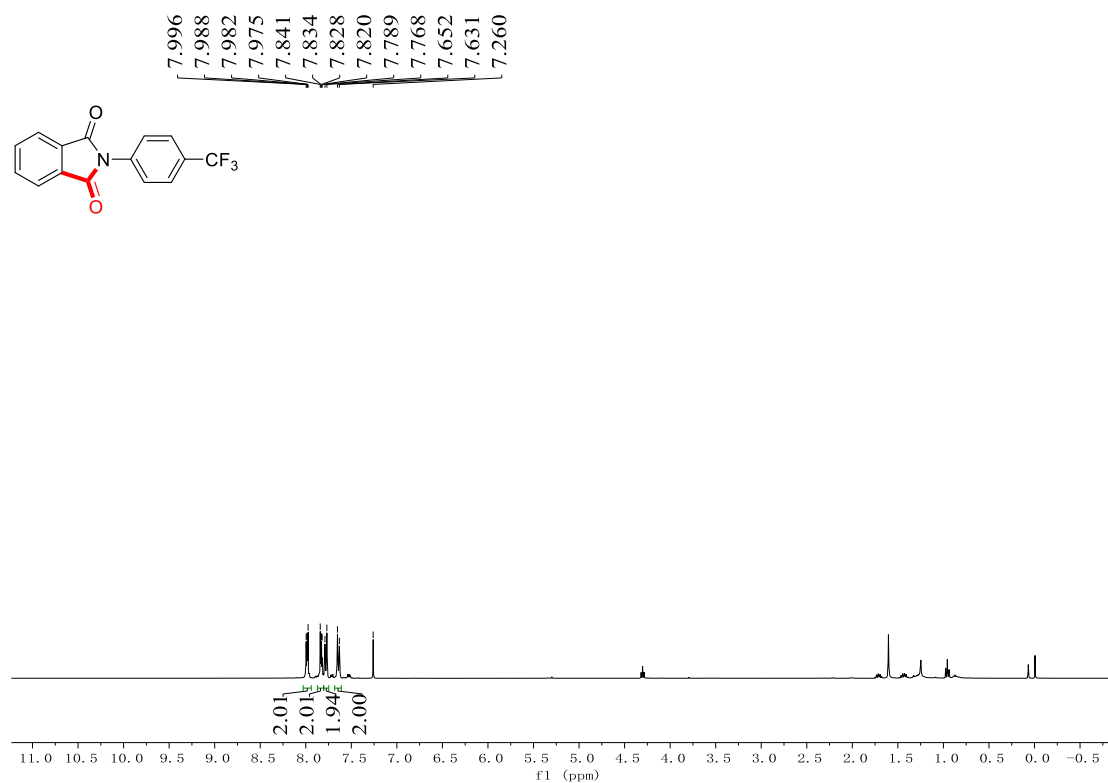

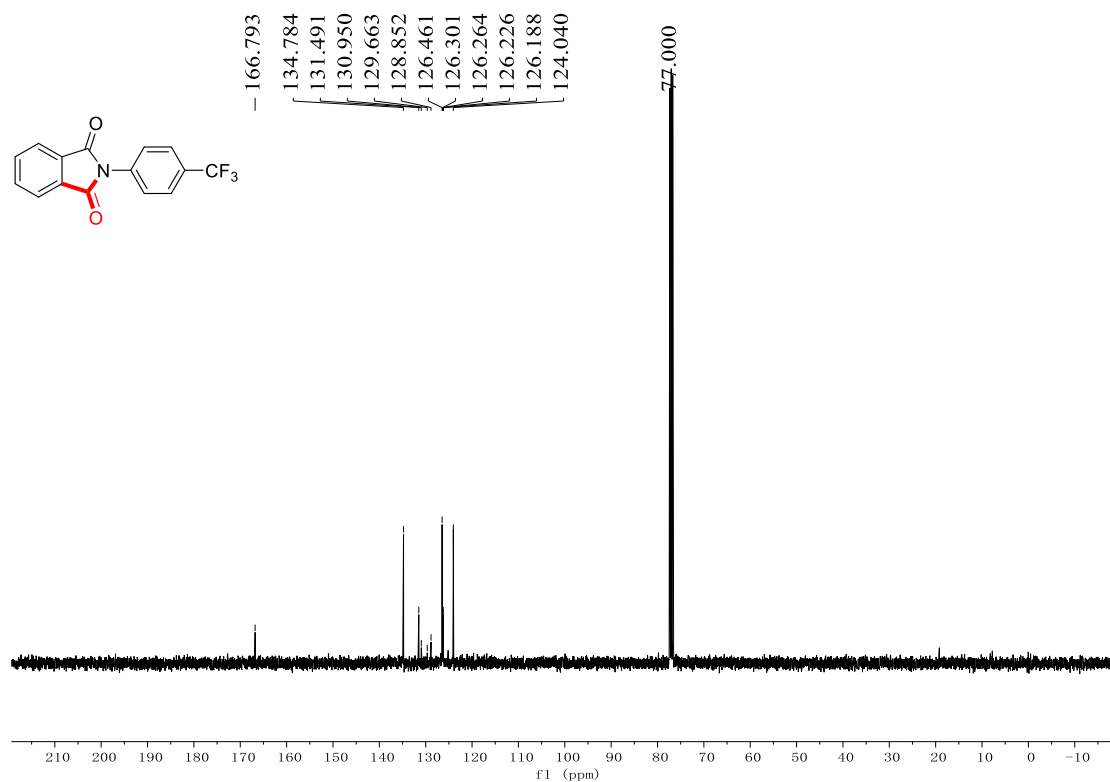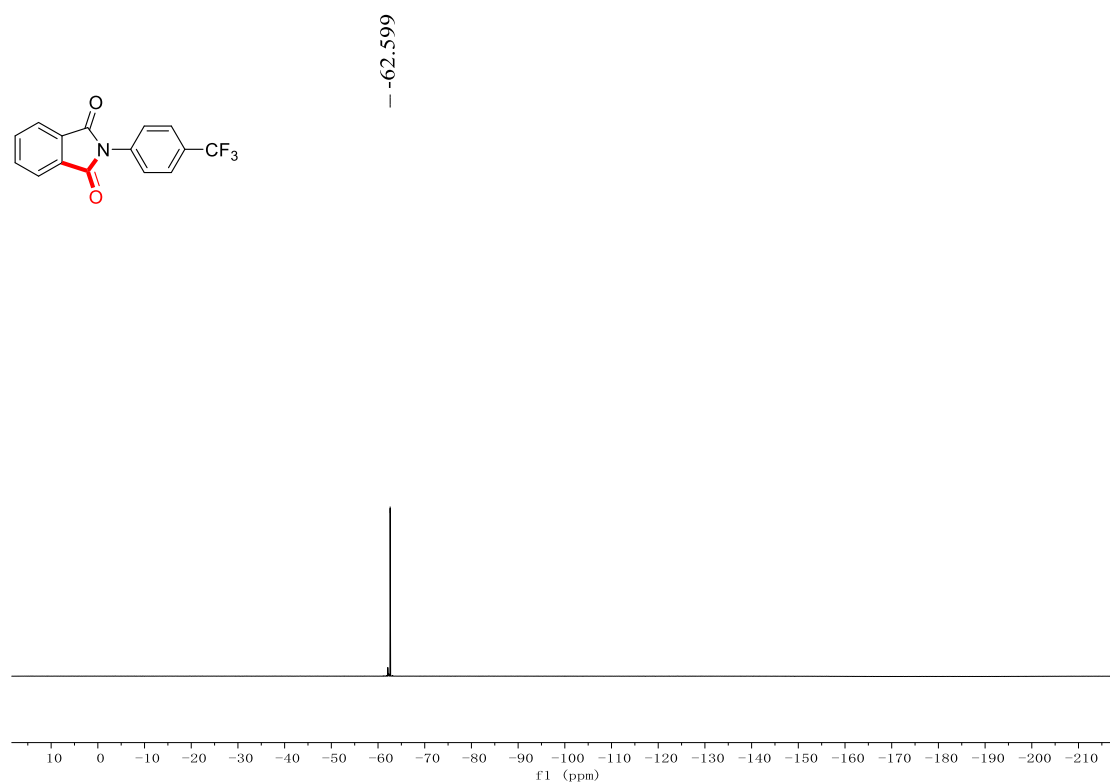

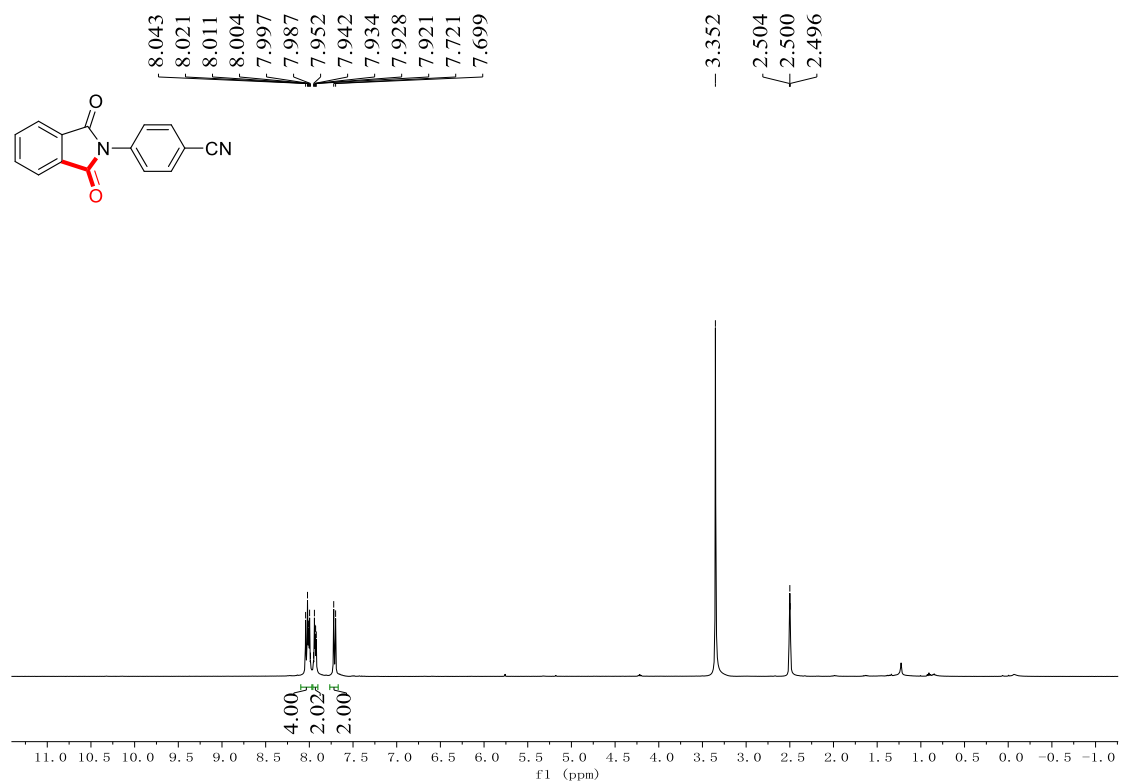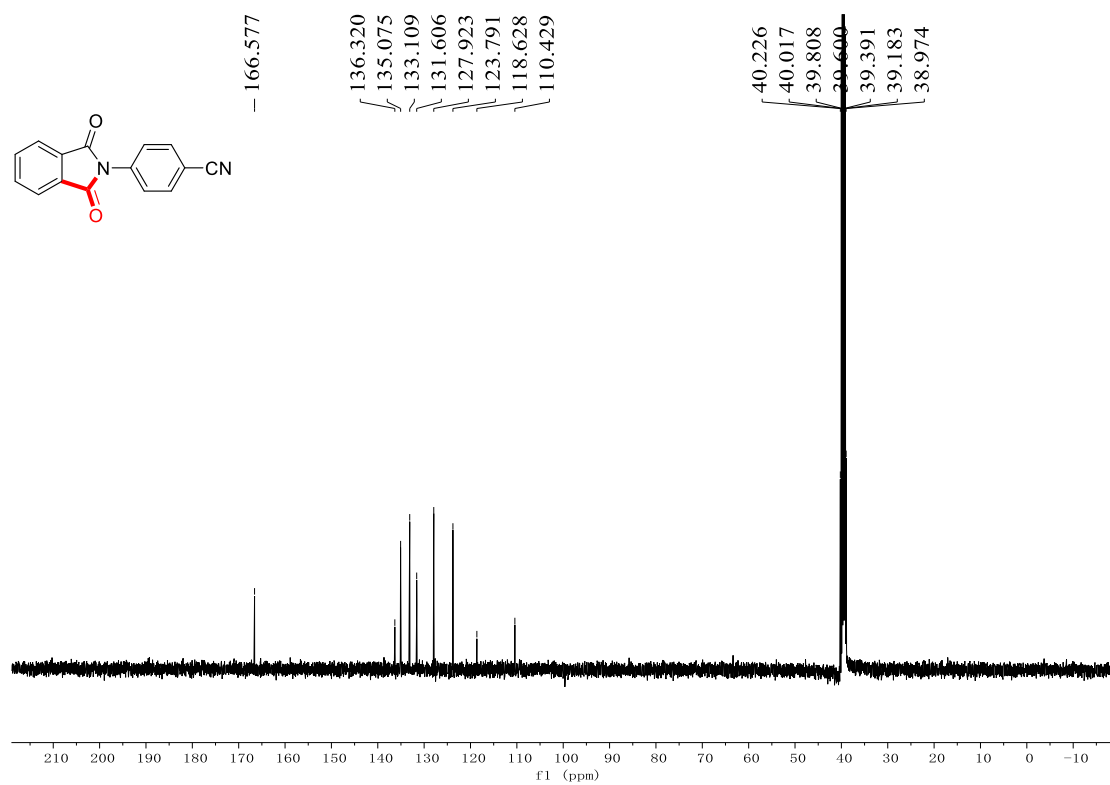

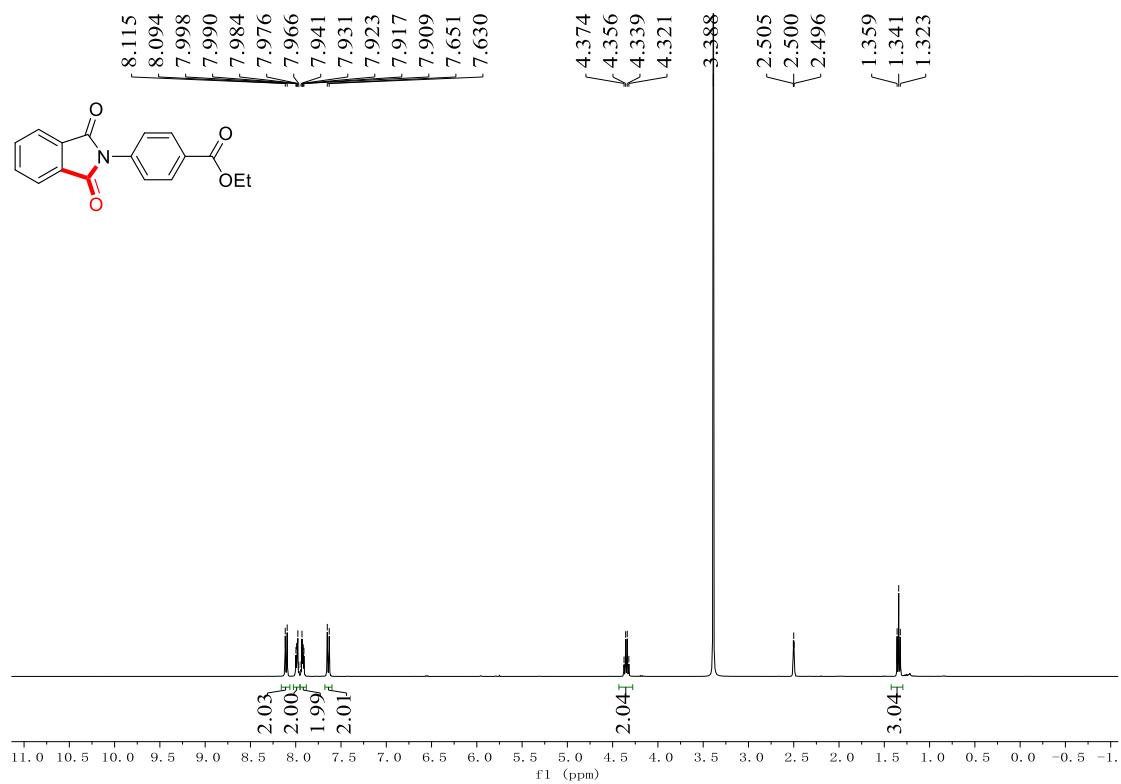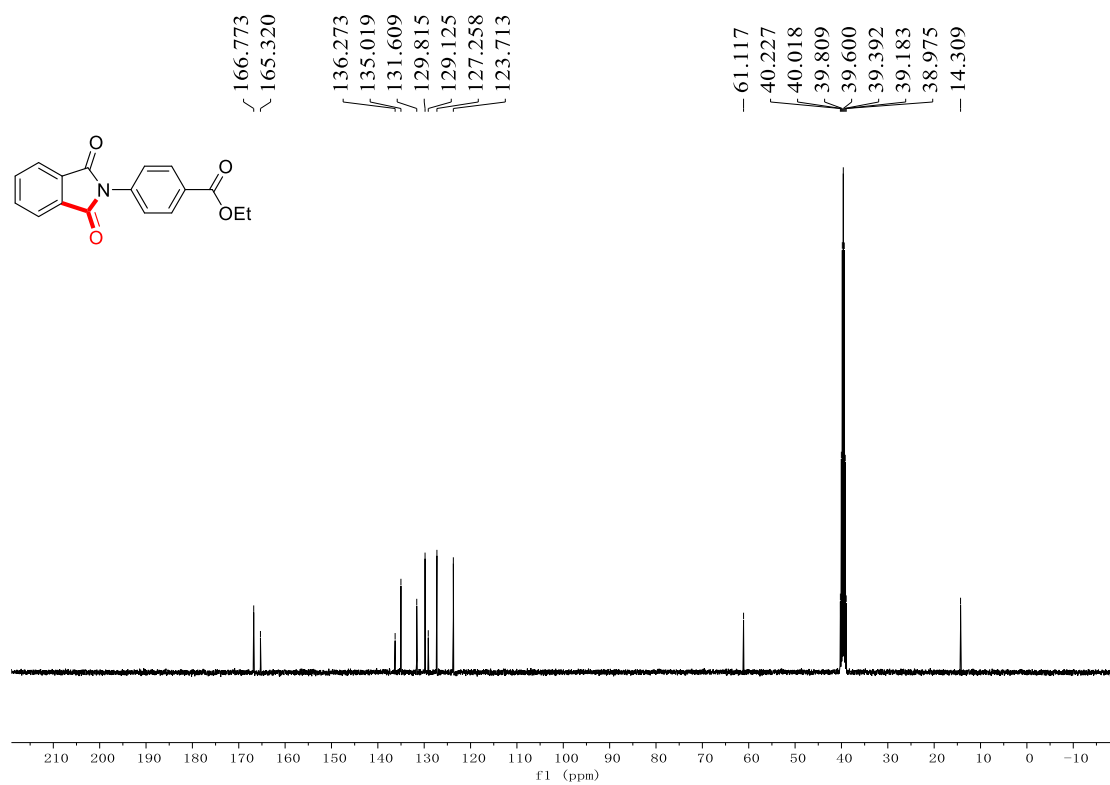

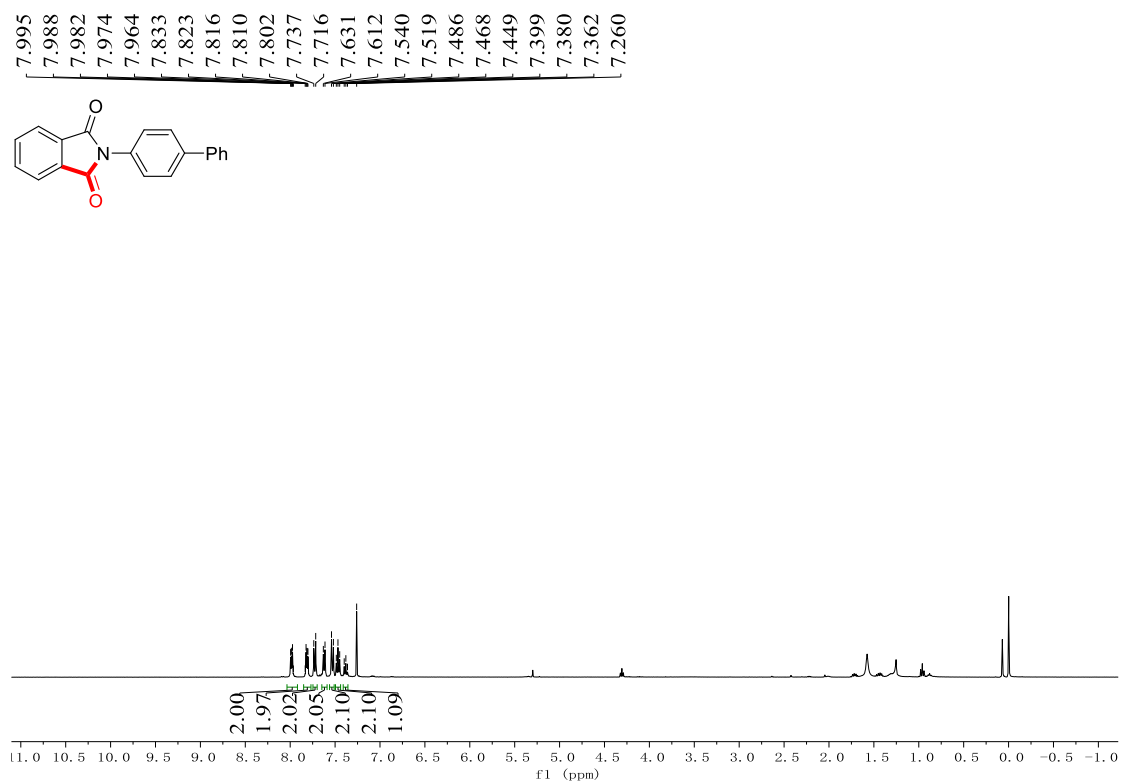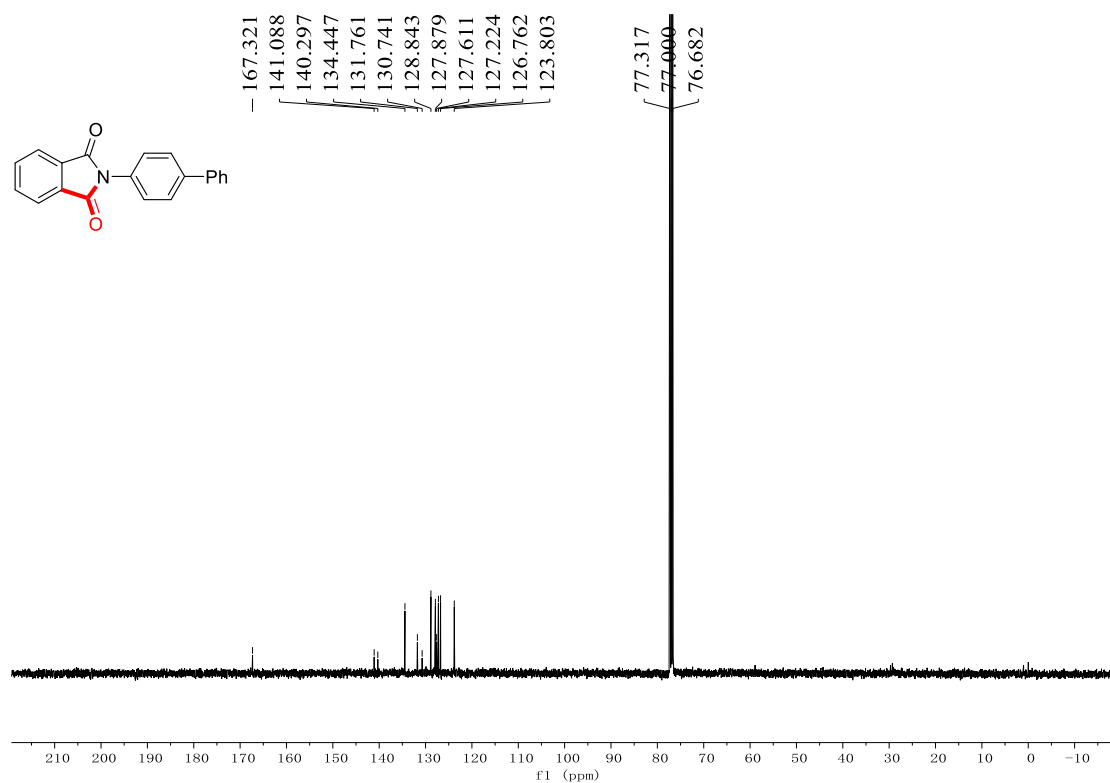



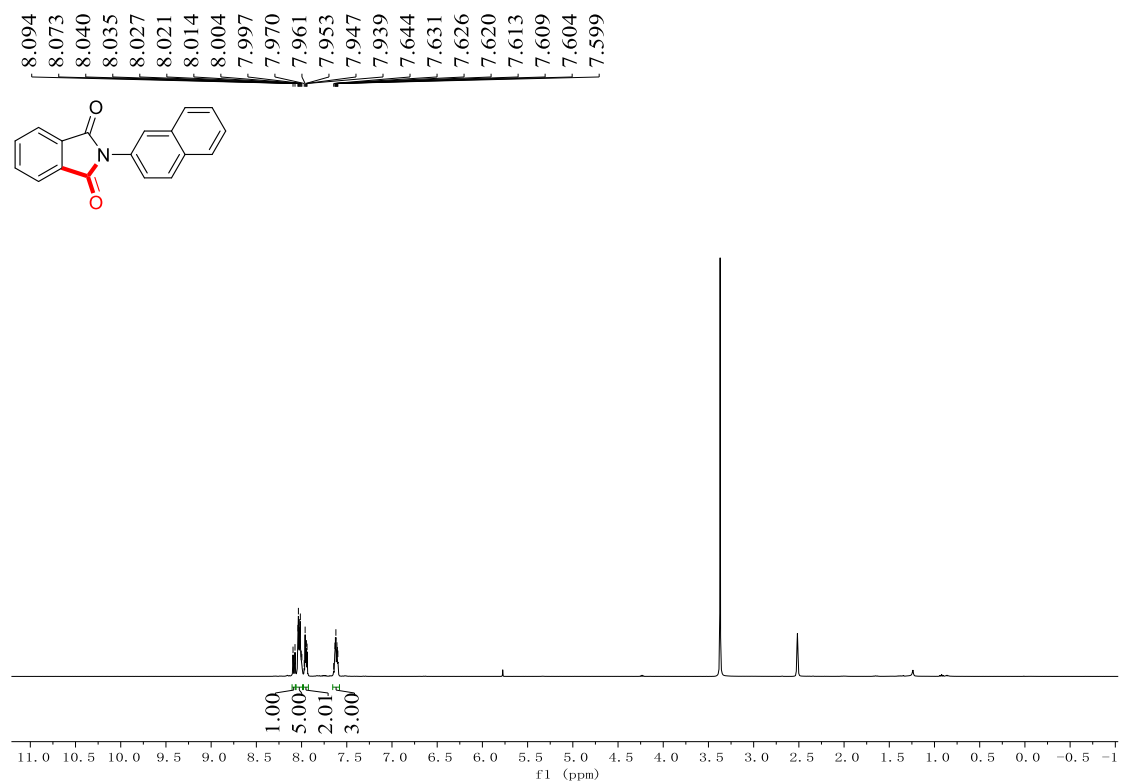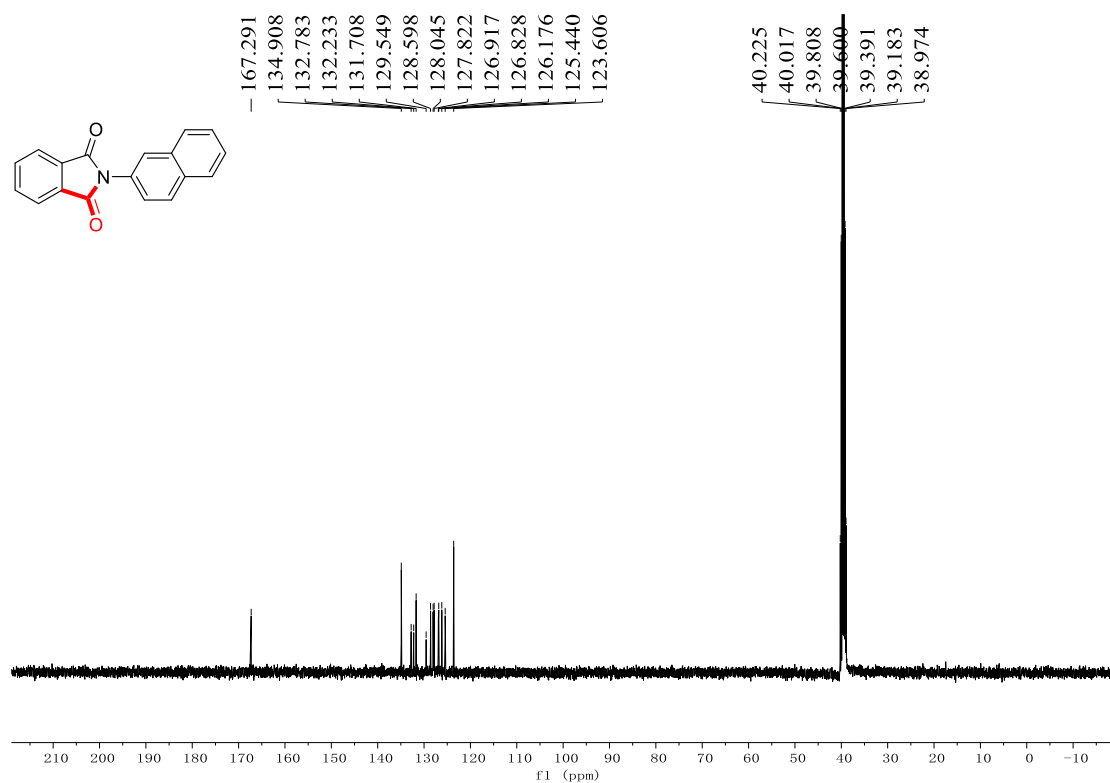

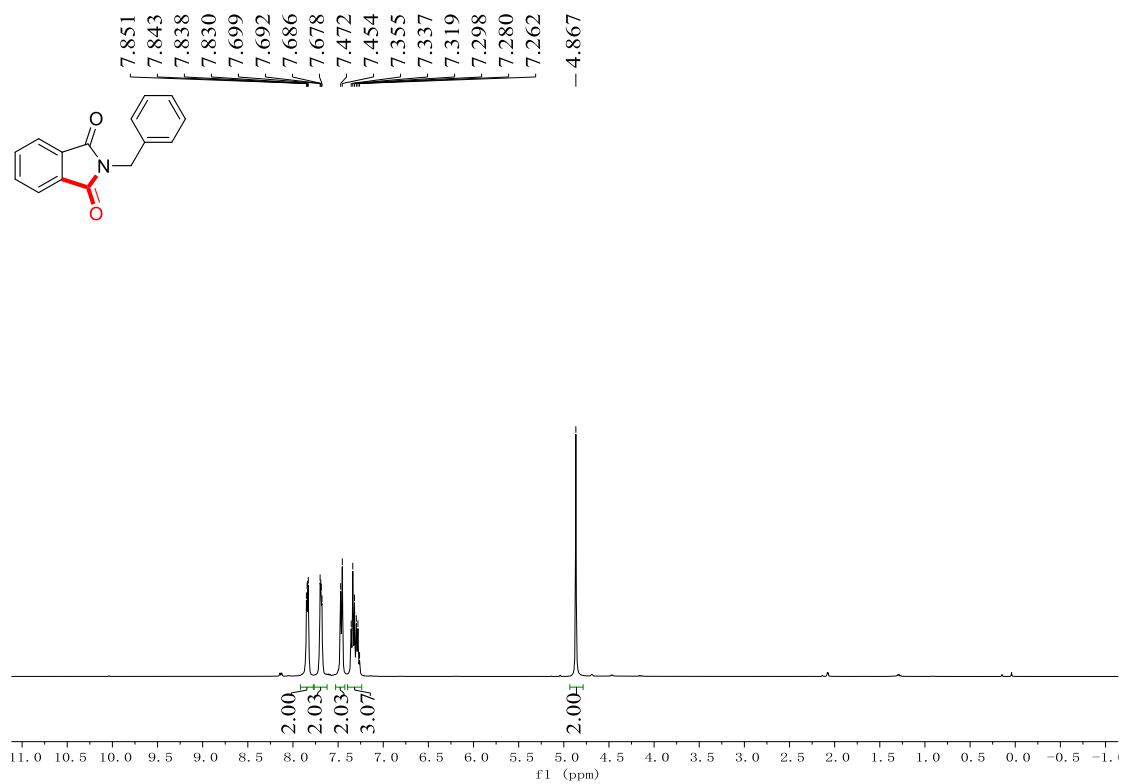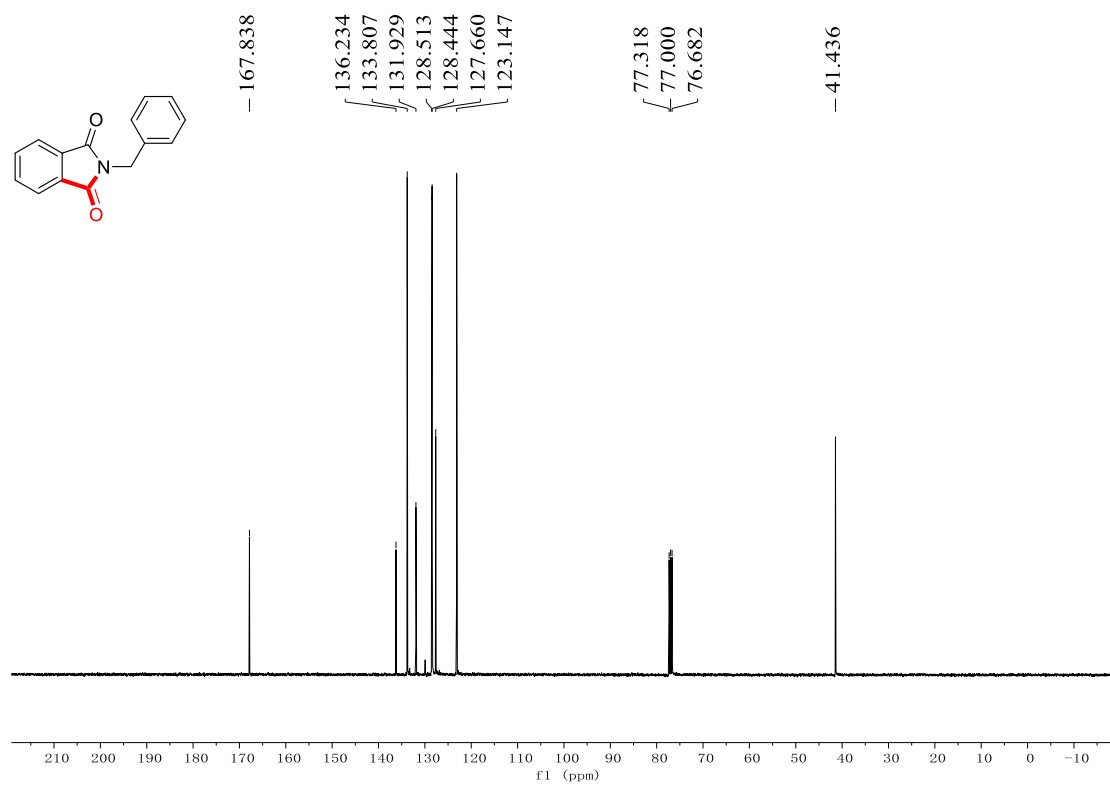

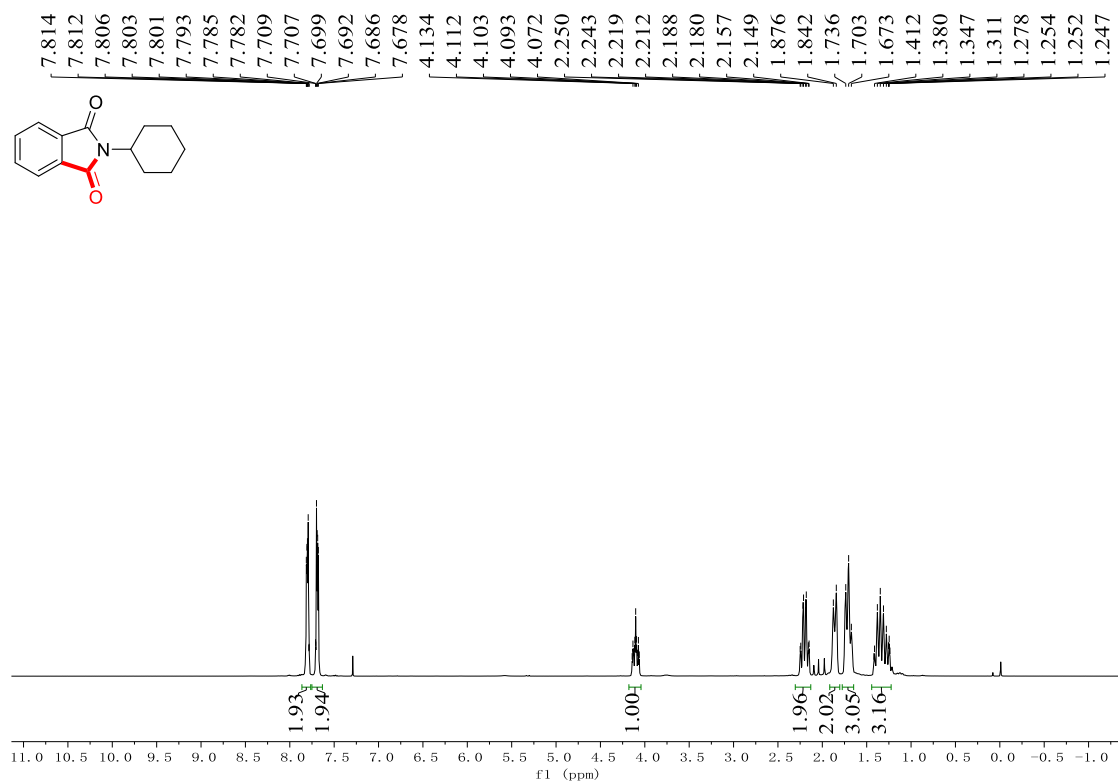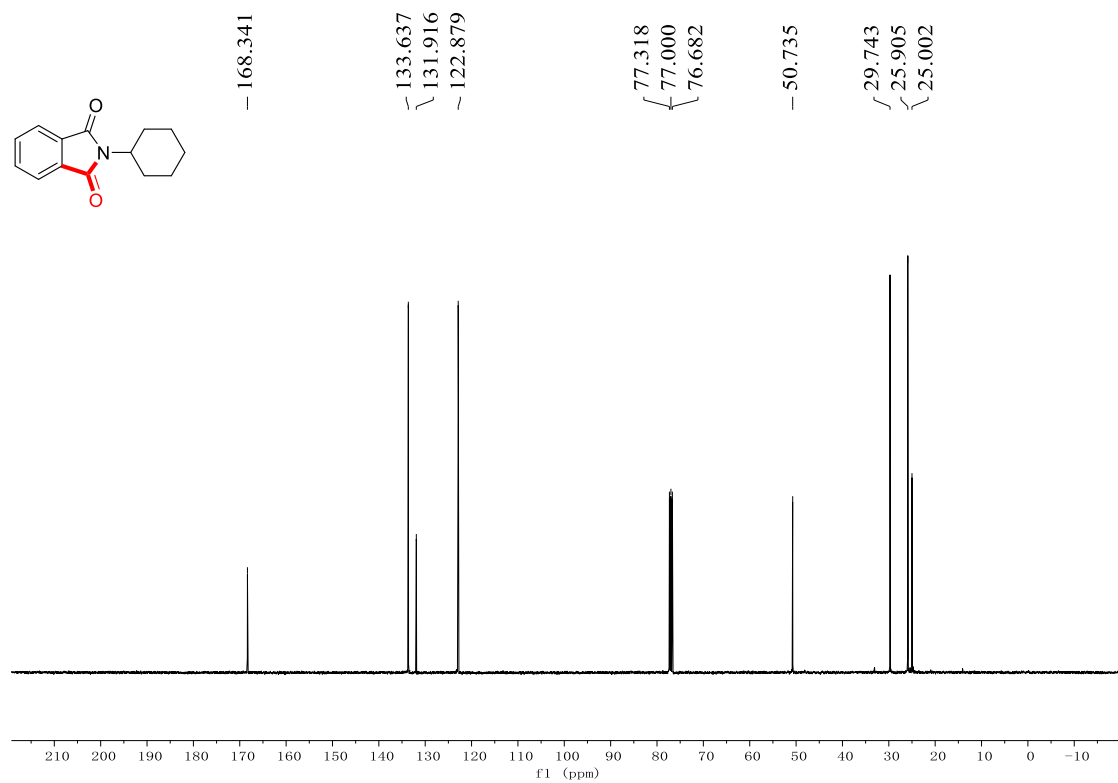

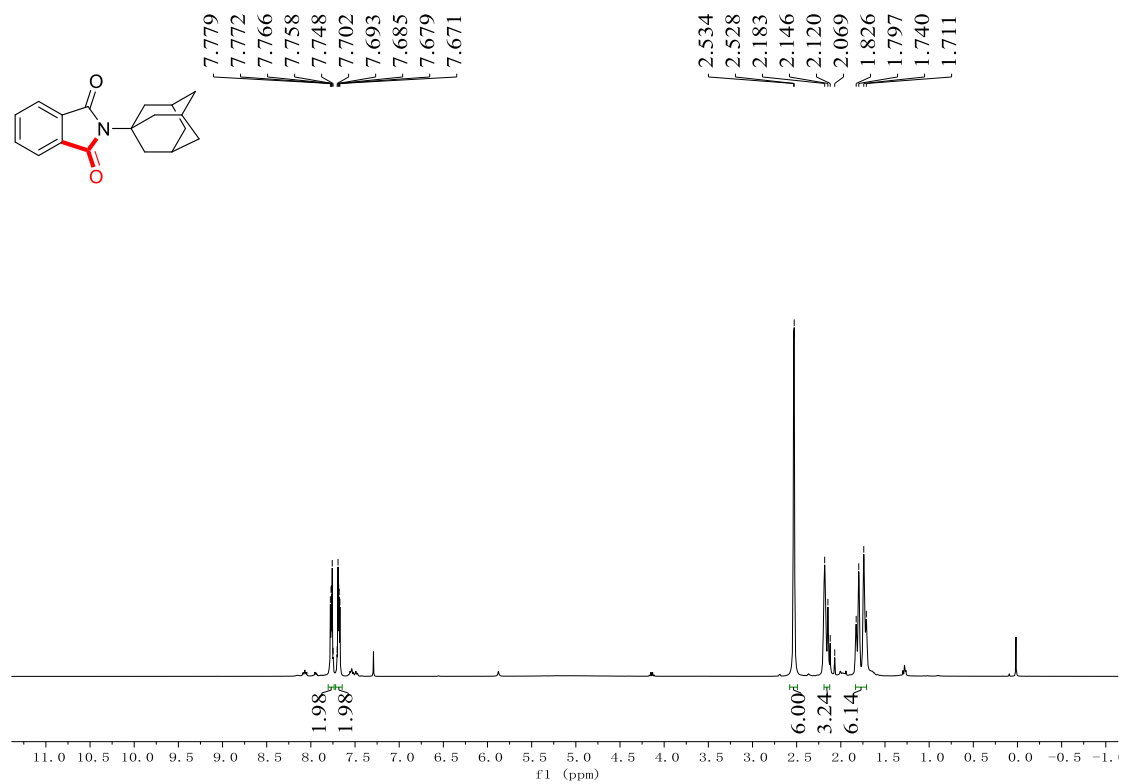

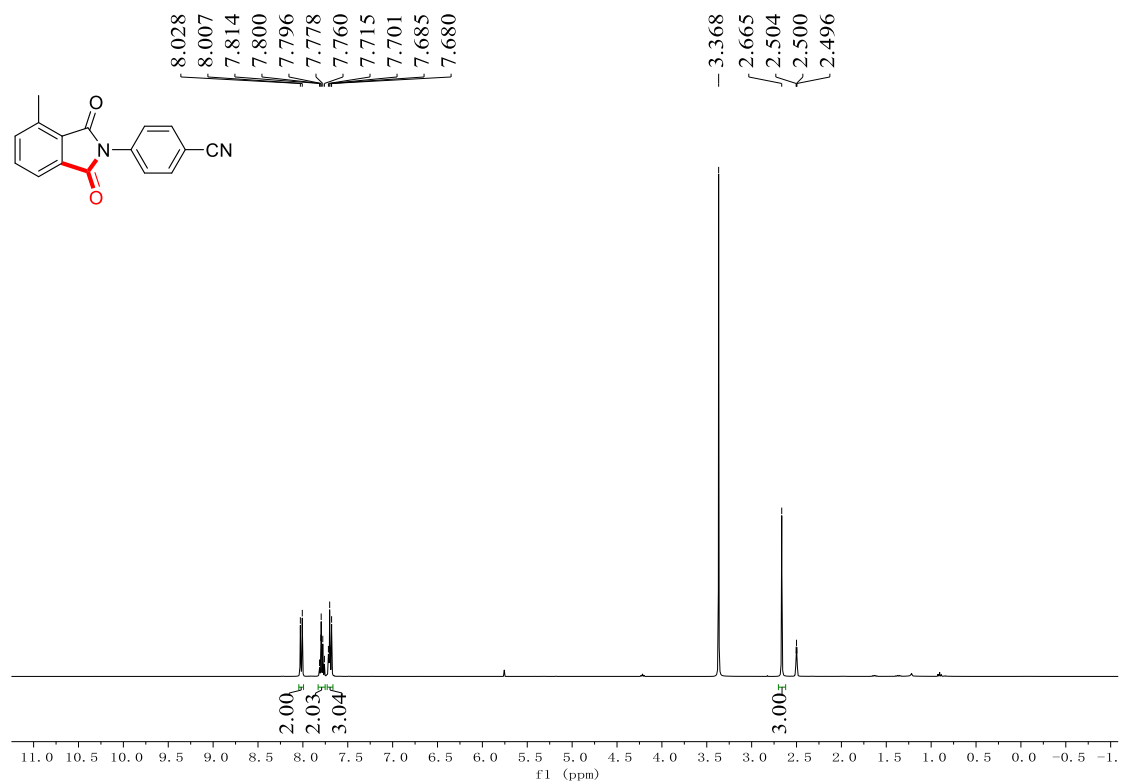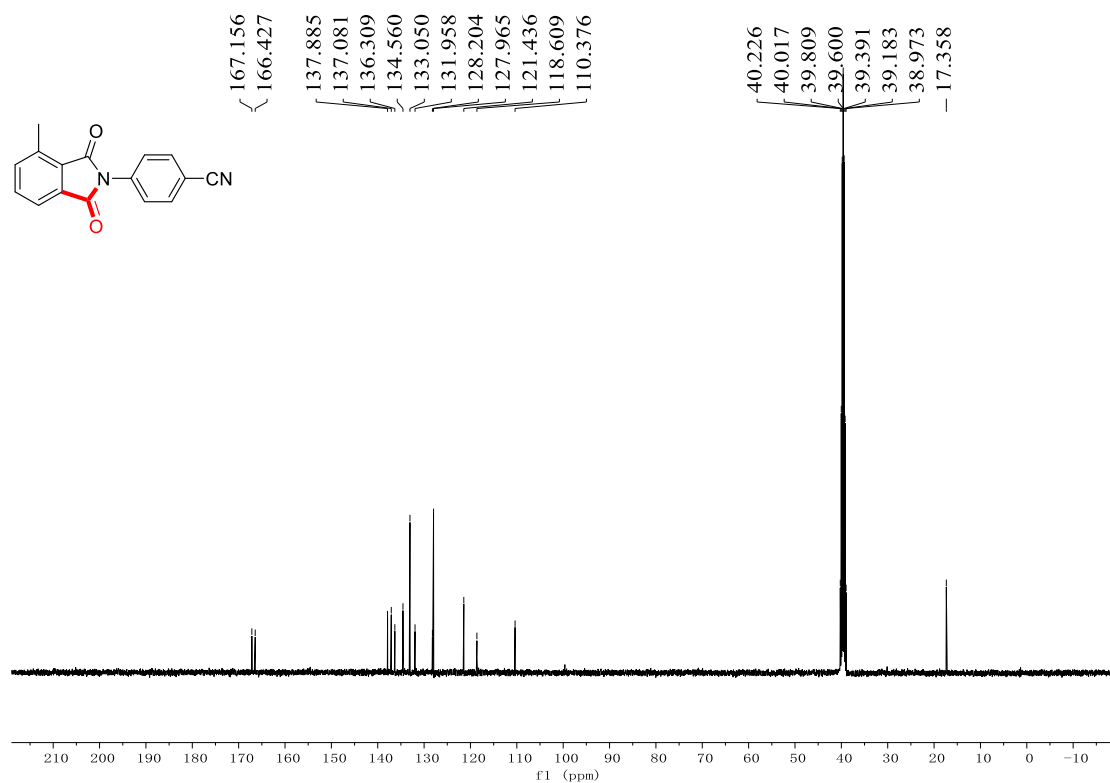

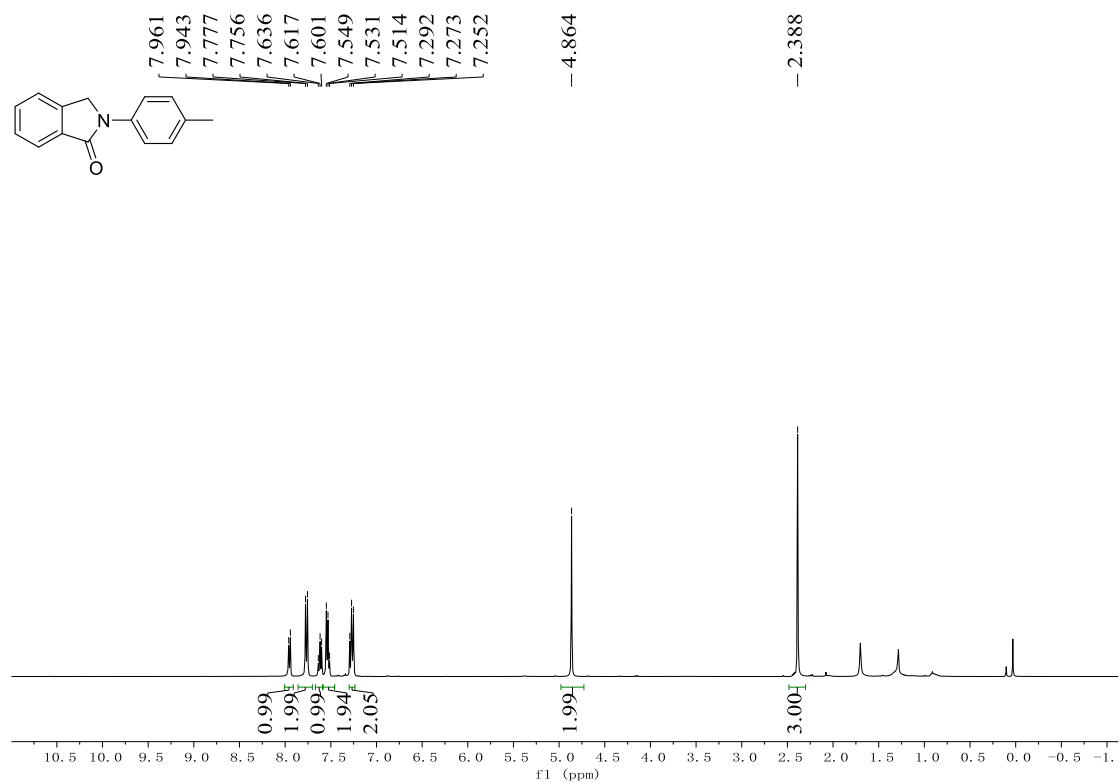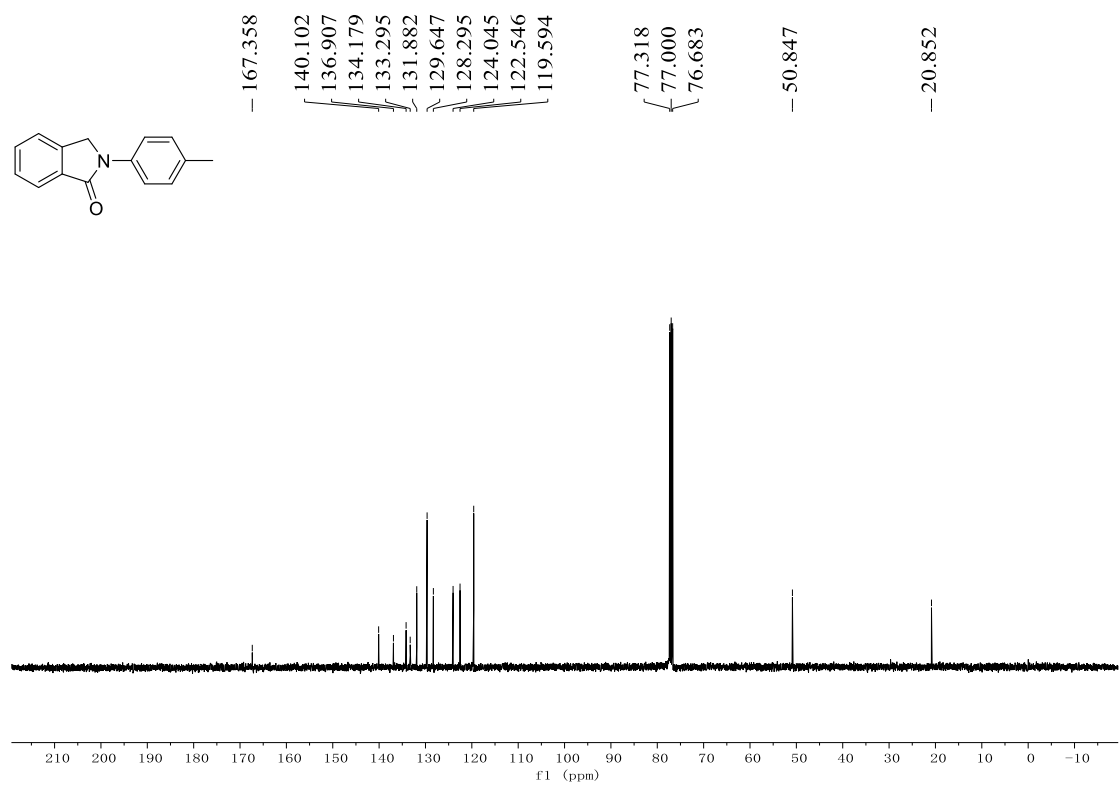

## 10. Reference

- [1] M. V. Khedkar, A. R. Shinde, T. Sasaki, B. M. Bhanage, *J. Mol. Catal. A: Chem.* **2014**, 385, 91-97.
- [2] S. Liu, Q. Deng, W. Fang, J.-F. Gong, M.-P. Song, M. Xu, T. Tu, *Org. Chem. Front.* **2014**, 1, 1261-1265.
- [3] H. Kim, T. Kim, D. G. Lee, S. W. Roh, C. Lee, *Chem. Commun.* **2014**, 50, 9273-9276.
- [4] M. Srinivas, A. D. Hudwekar, V. Venkateswarlu, G. L. Reddy, K. A. A. Kumar, R. A. Vishwakarma, S. D. Sawant, *Tetrahedron Lett.* 2015, 56, 4775-4779.
- [5] R. J. Perry, S. R. Turner, *J. Org. Chem.* **1991**, 56, 6573-6579.
- [6] G. Gardner, J. E. Semple, *J. Plant Growth Regul.* **1990**, 9, 161.
- [7] Y. Fang, S.-Y. Wang, S.-J. Ji, *Tetrahedron* **2015**, 71, 2768-2771.
- [8] L. Wan, X. Sun, S. Shi, J. Zhang, X. Li, Z. Li, K. Guo, *Catal. Commun.* **2017**, 88, 30-34.
- [9] S. Mangani, L. Cancian, R. Leone, C. Pozzi, S. Lazzari, R. Luciani, S. Ferrari, M. P. Costi, *J. Med. Chem.* **2011**, 54, 5454-5467.
- [10] J. Wan, B. Wu, Y. Pan *Tetrahedron* **2007**, 63, 9338-9344.
- [11] M. Schlosser, H. C. Jung, S. Takagishi, *Tetrahedron* **1990**, 46, 5633-5648.
- [12] A. Demeter, T. Berces, L. Biczok, V. Wintgens, P. Valat, J. Kossanyi, *J. Chem. Soc., Faraday Trans.* **1994**, 90, 2635-2641.
- [13] Elwell, C. E.; Gagnon, N. L.; Neisen, B. D.; Dhar, D.; Spaeth, A. D.; Yee, G. M.; Tolman, W. B. *Chem. Rev.* **2017**, 117, 2059.
- [14] Lu, X. In *Handbook of Organopalladium Chemistry for Organic Synthesis*; John Wiley & Sons, Inc.: 2003, p 2267.
